# Supplementary material for: Probing the Therapeutic Potential of Marine Phyla by SPE Extraction
Source: MDPI journal article supplement (doi:10.3390/md19110640), 2021-11-16

**MTT assay of the in-house library of Marine Natural Products on PNT2 (prostate epithelium immortalized with SV40), A549 (pulmonary adenocarcinoma) and A2780 (ovarian carcinoma) cell lines after 48h of incubation.** The results were expressed as percentage of vitality after treatment with extracts (X) and related SPE fractions (B-E), compared to untreated cells at 1 (orange bars), 10 (green bars), and 100  $\mu\text{g/mL}$  (brown bars).

CBC 1 A: (Porifera)

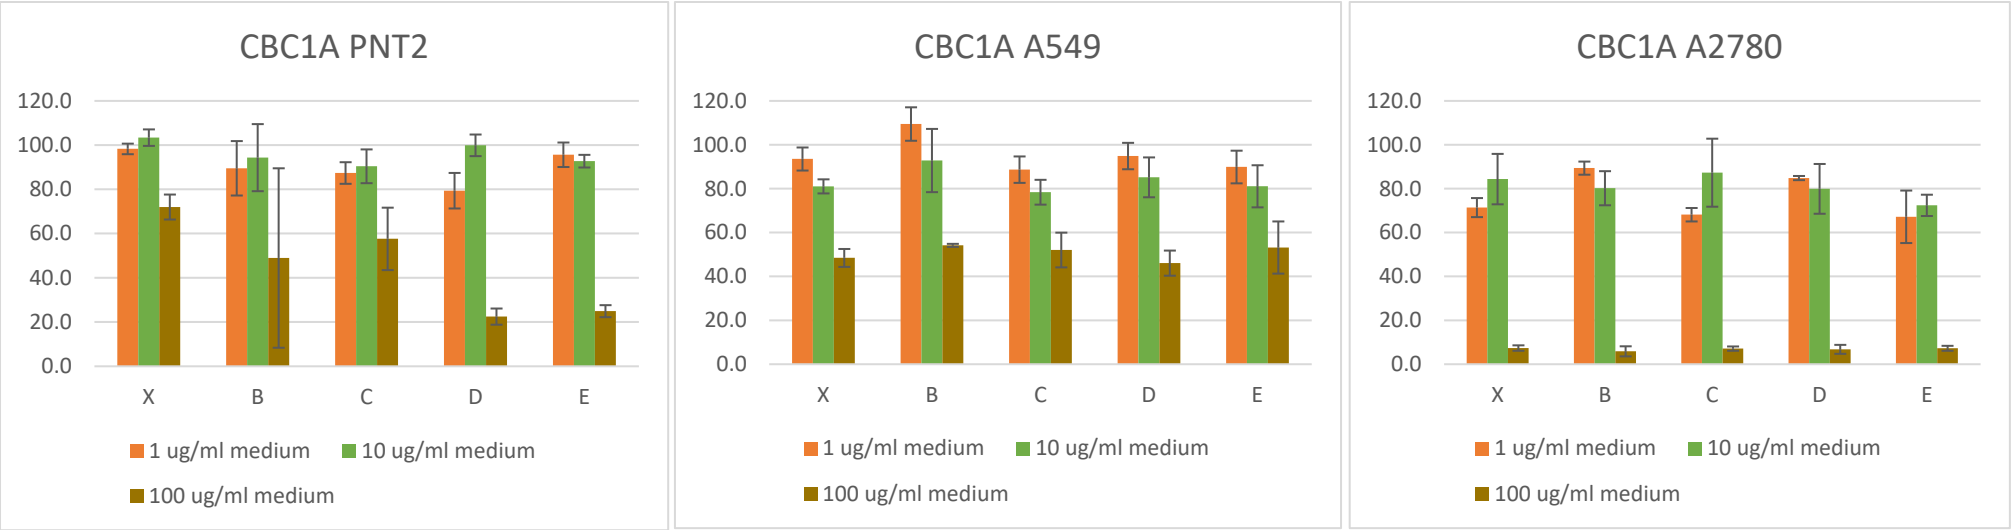

## CBC 2 A: (Porifera)

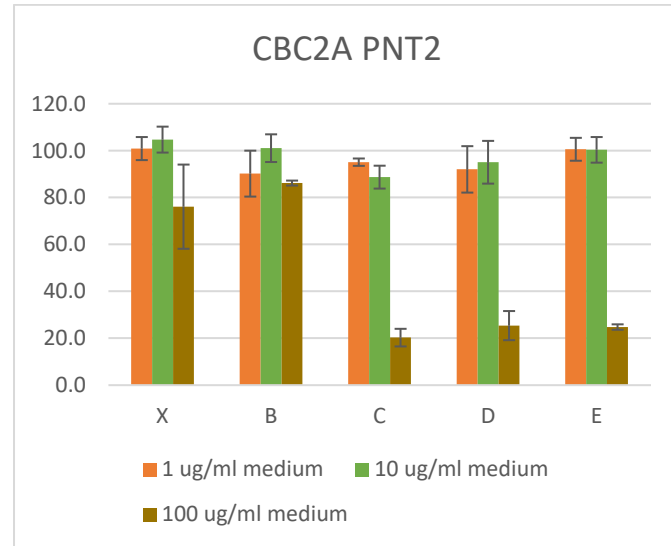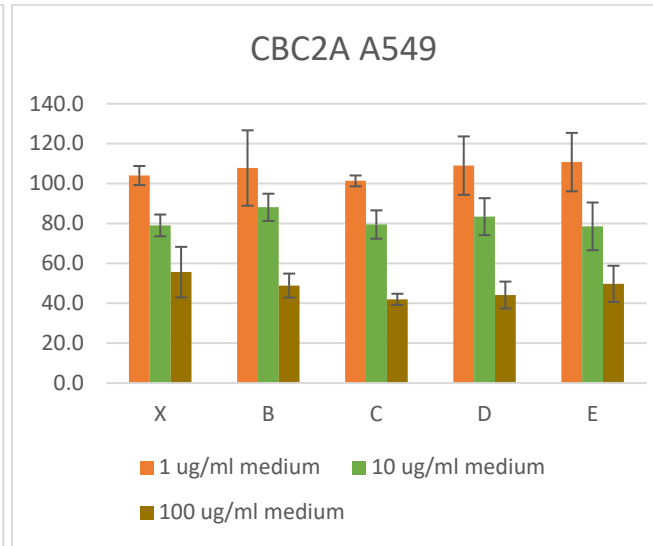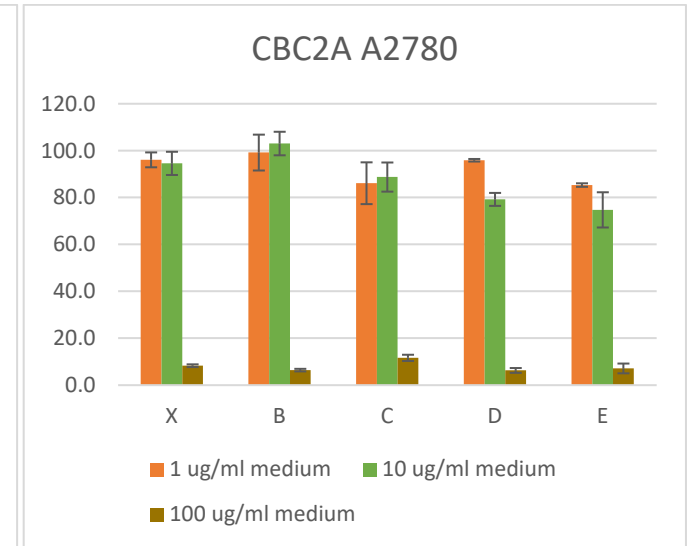

## CBC 3 A: (Porifera)

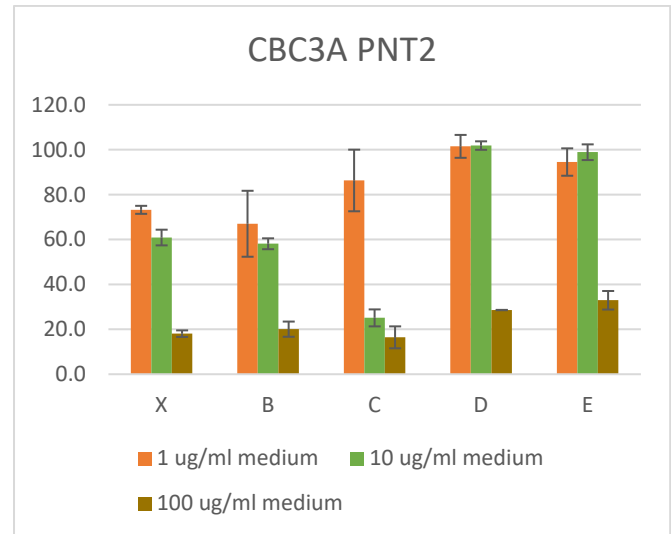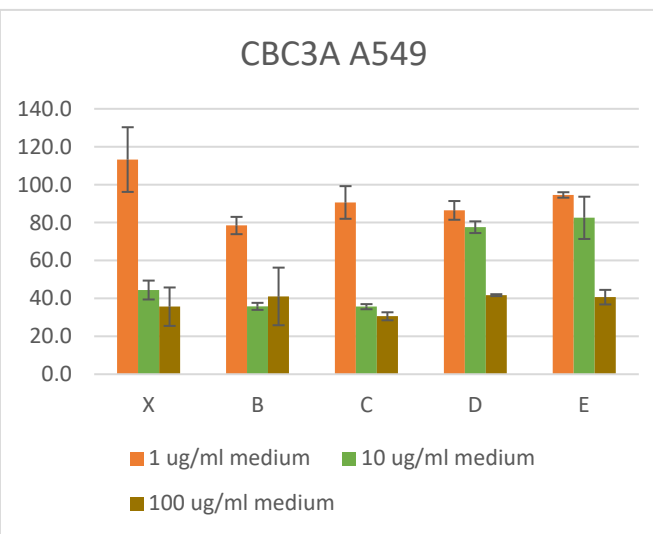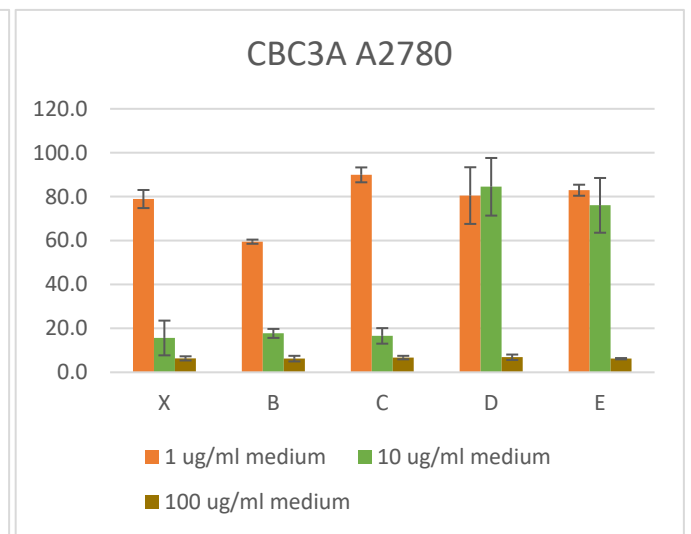

## CBC 4 A: (Porifera)

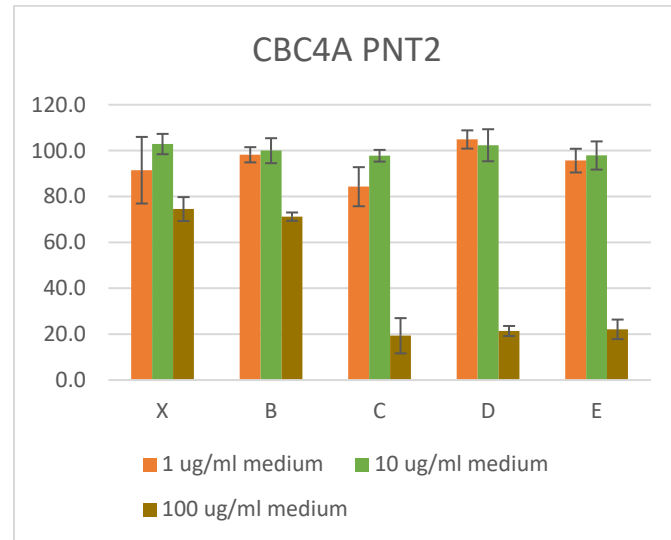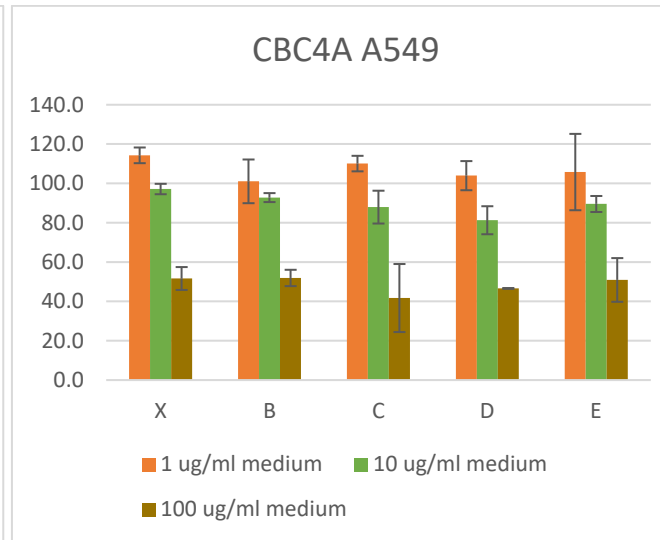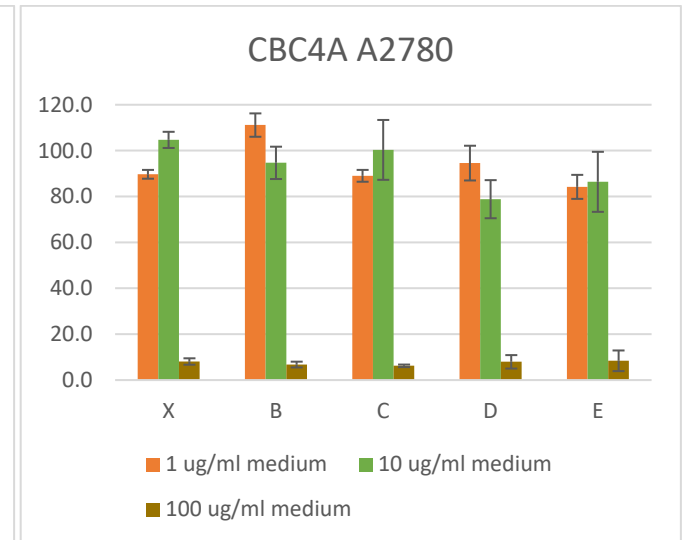

## CBC 10 A: (Porifera)

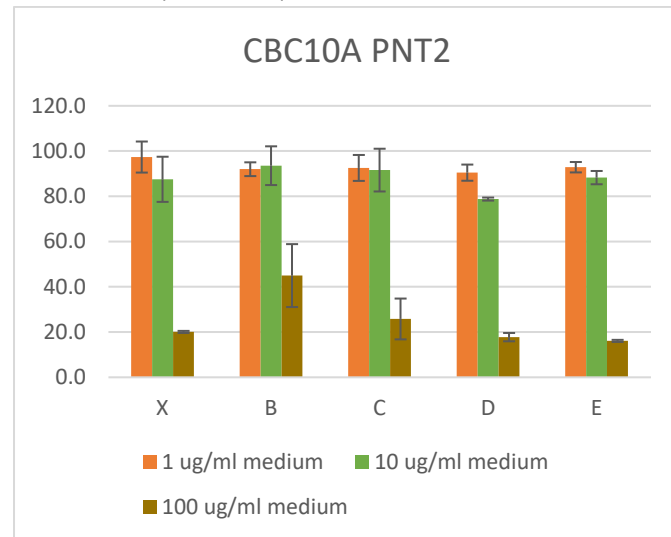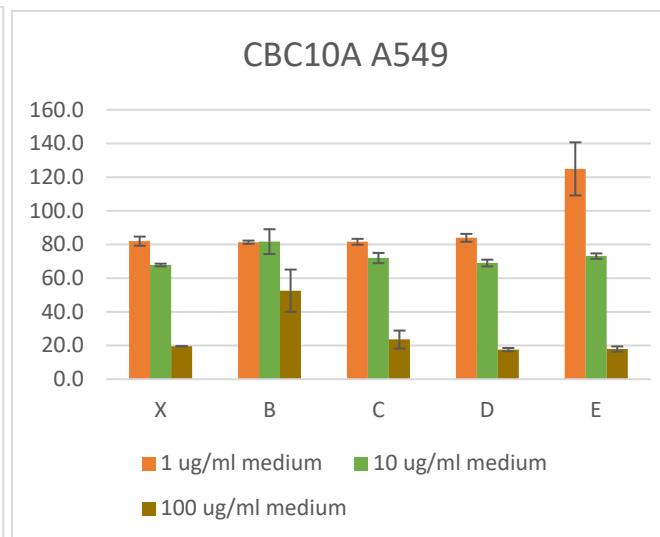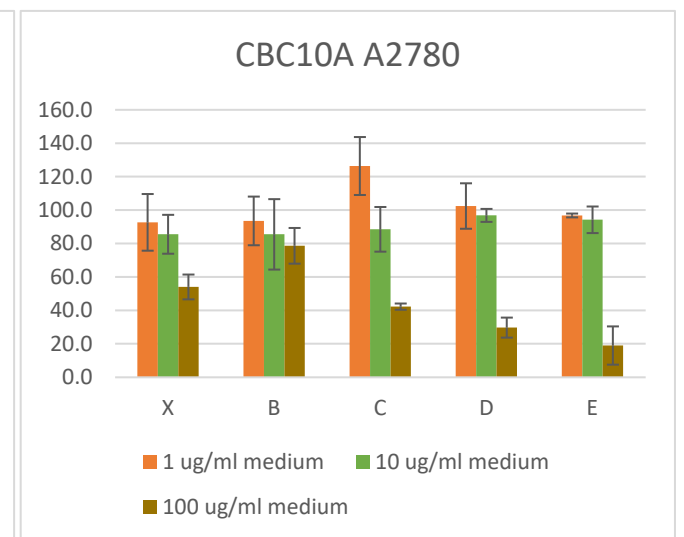

## CBC 11 A: (Porifera)

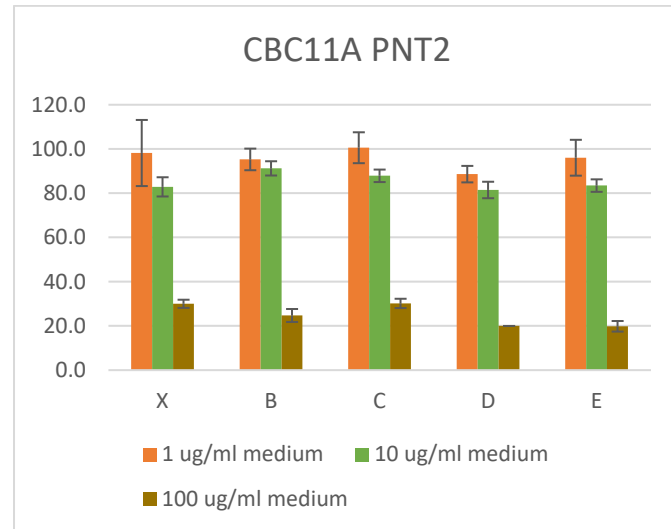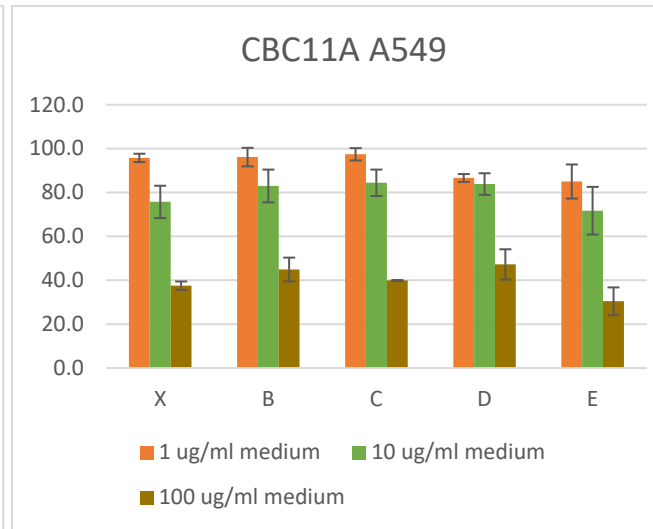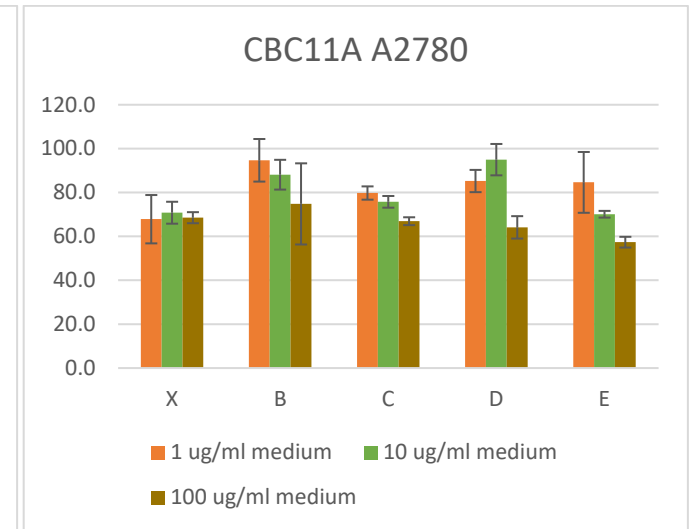

## CBC 12 A: (Porifera)

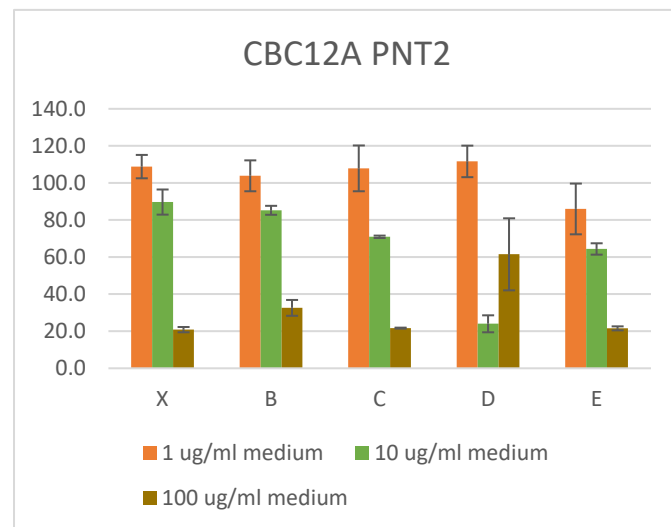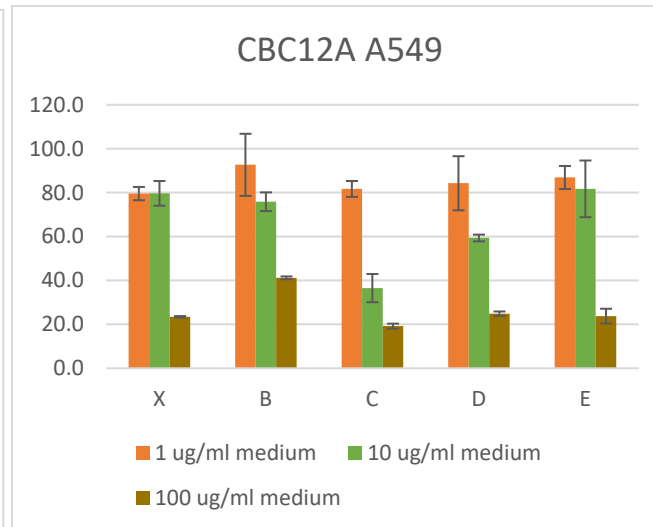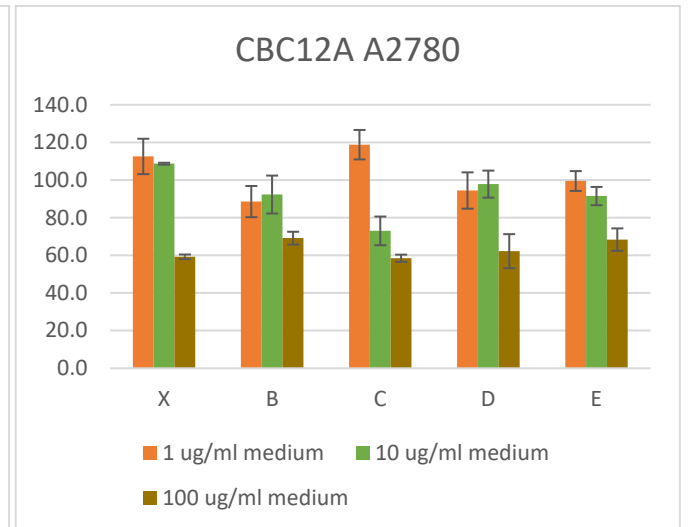

## CBC 13 A: (Porifera)

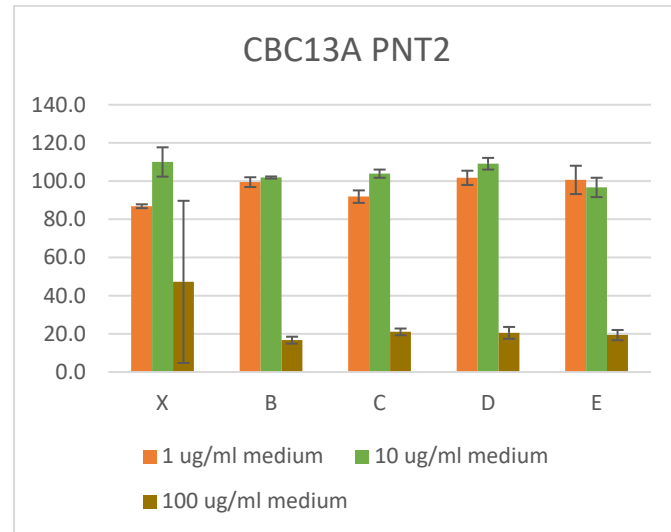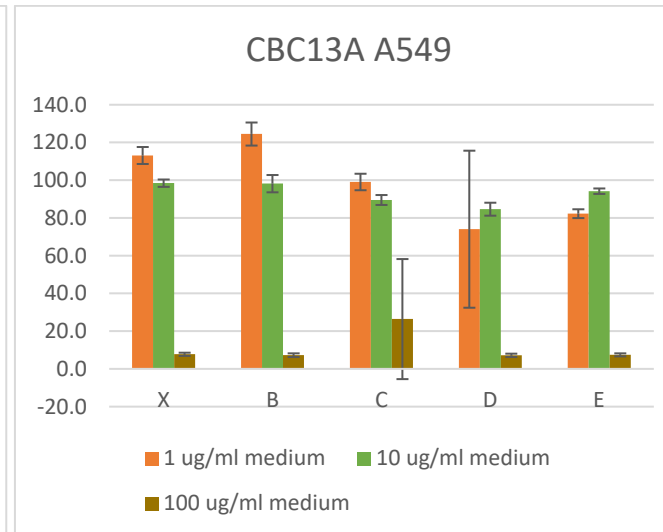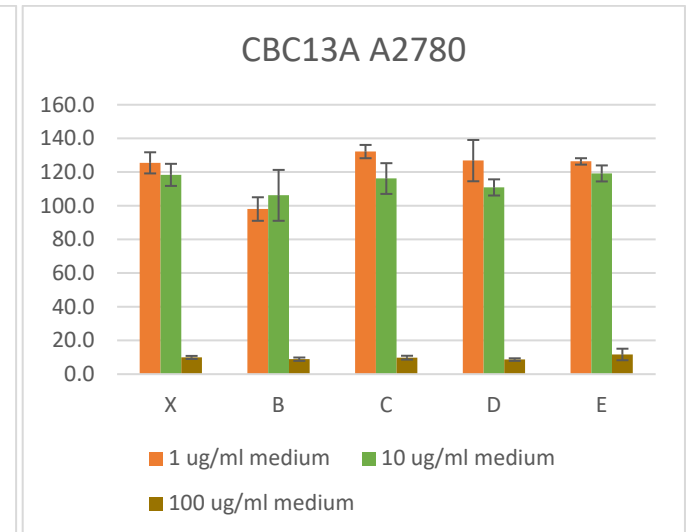

## CBC 14 A: (Porifera)

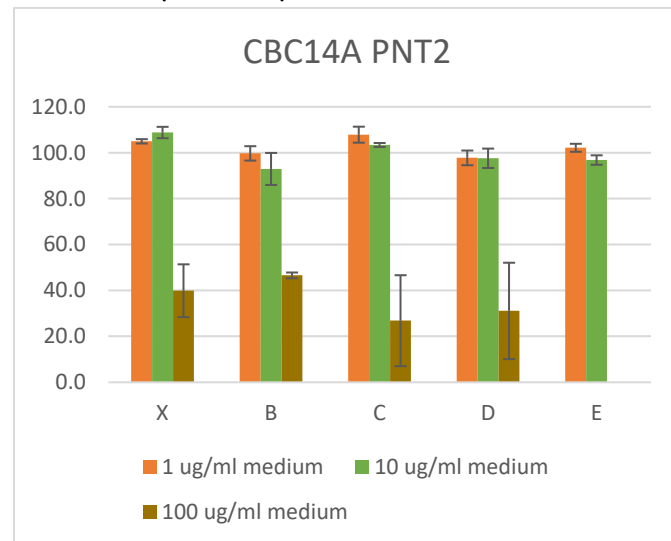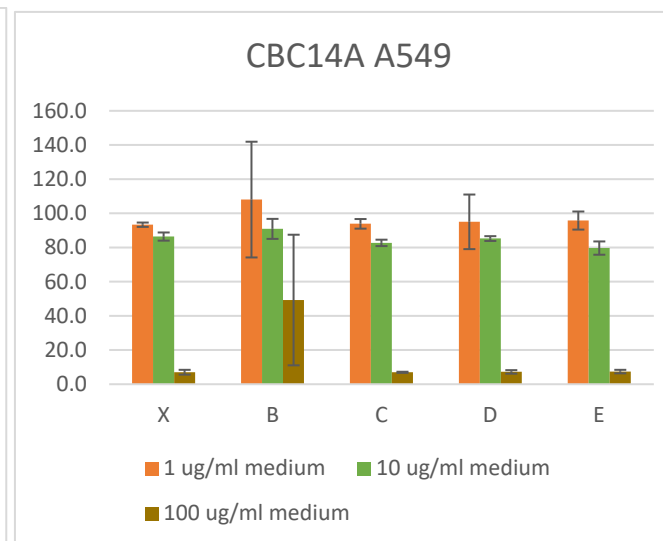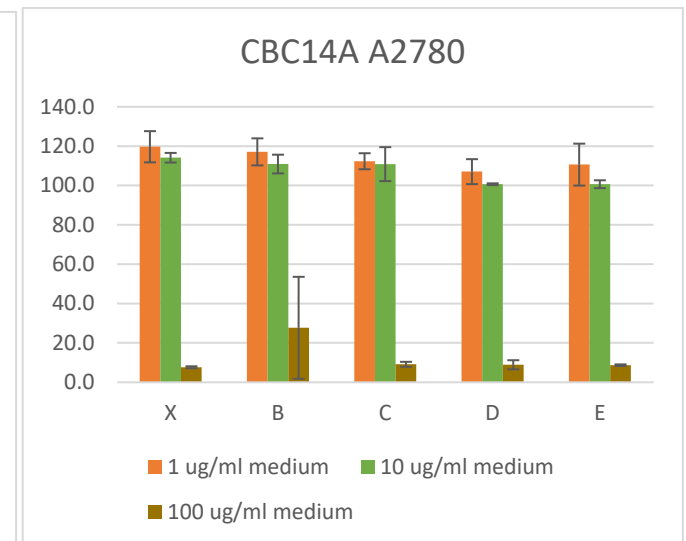

## CBC 15 A: (Porifera)

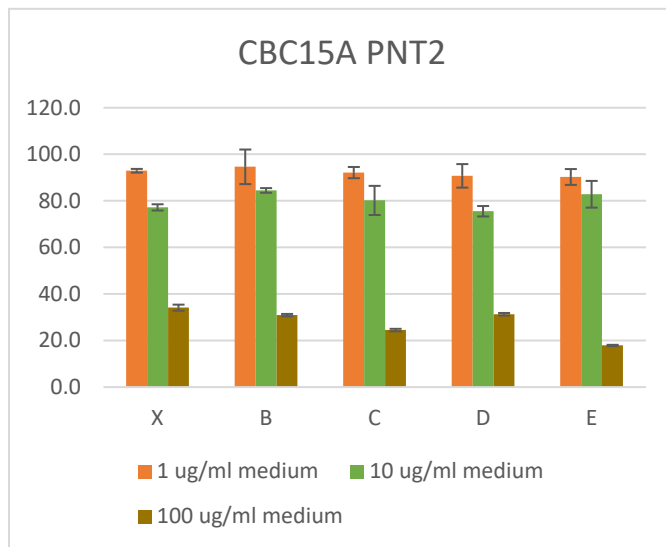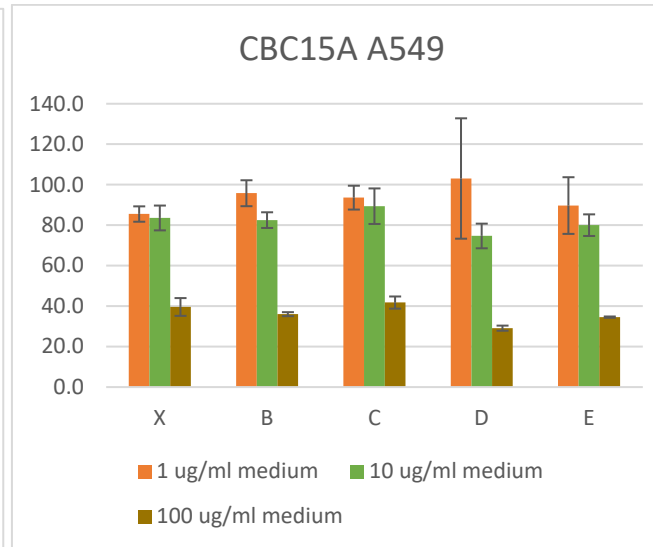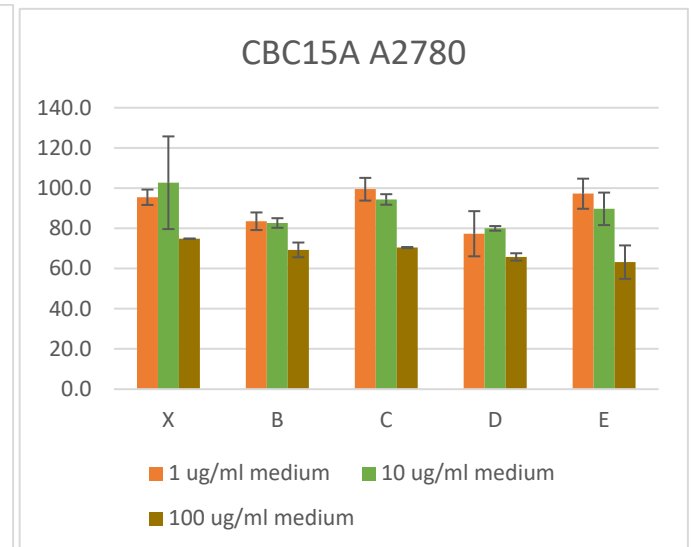

## CBC 16 A: (Porifera)

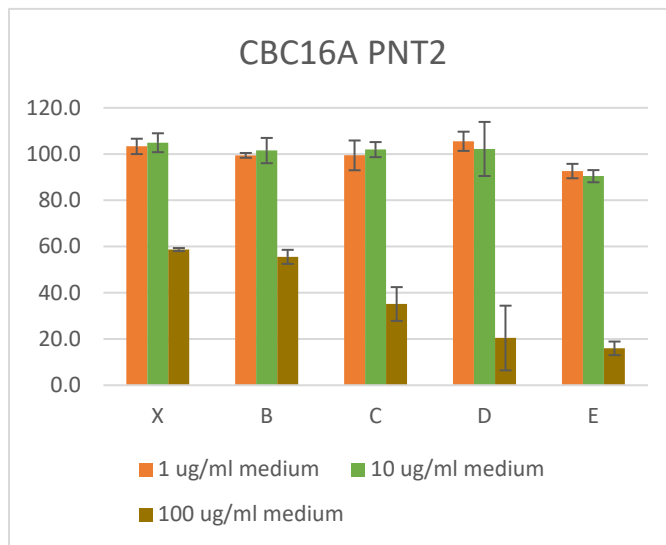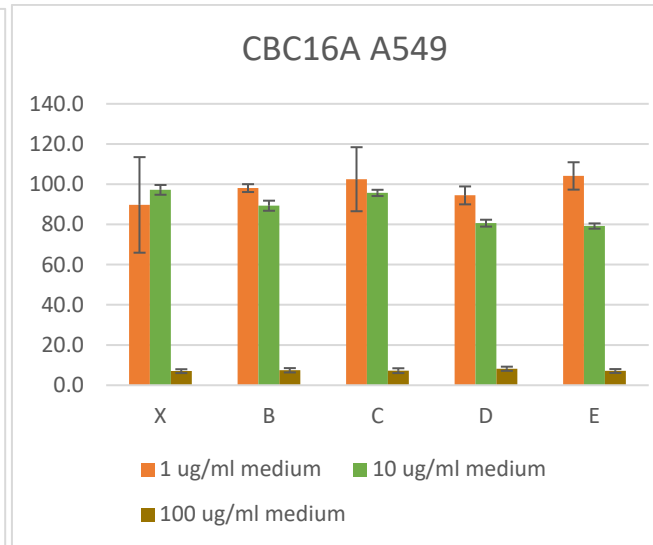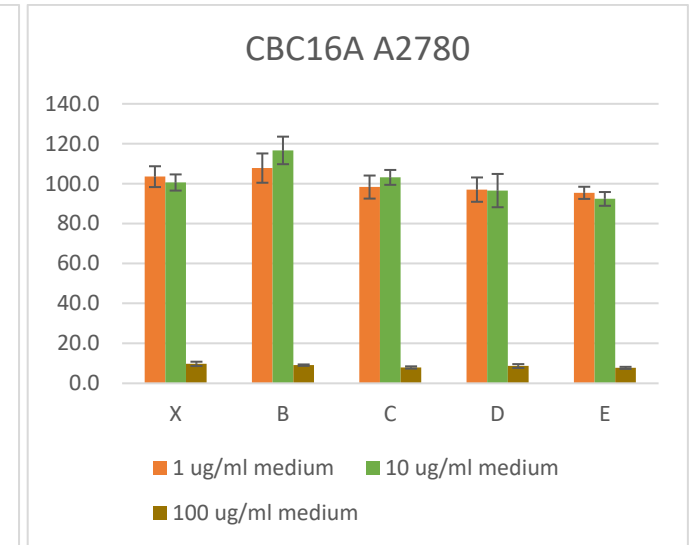

## CBC 17 A: (Porifera)

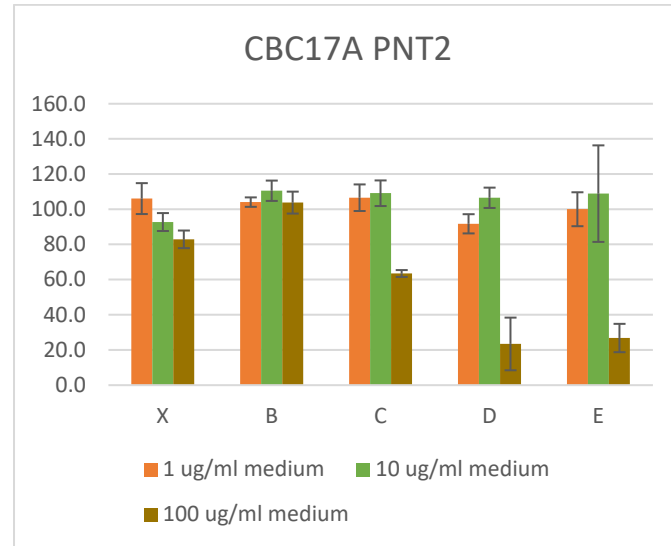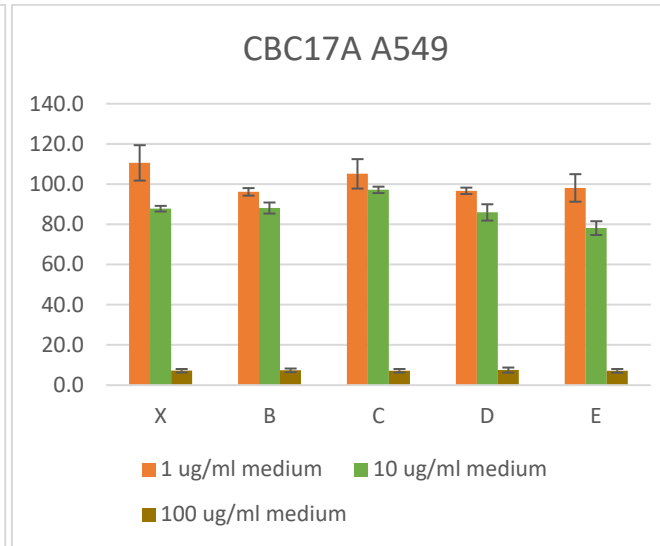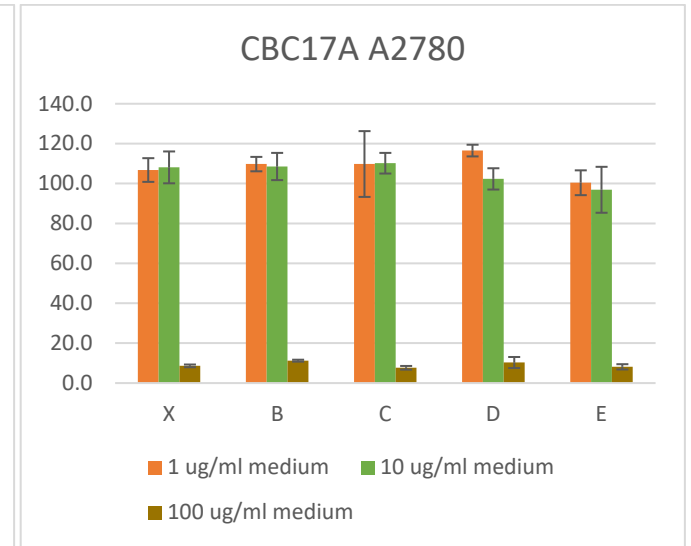

## CBC 18 A: (Chordata)

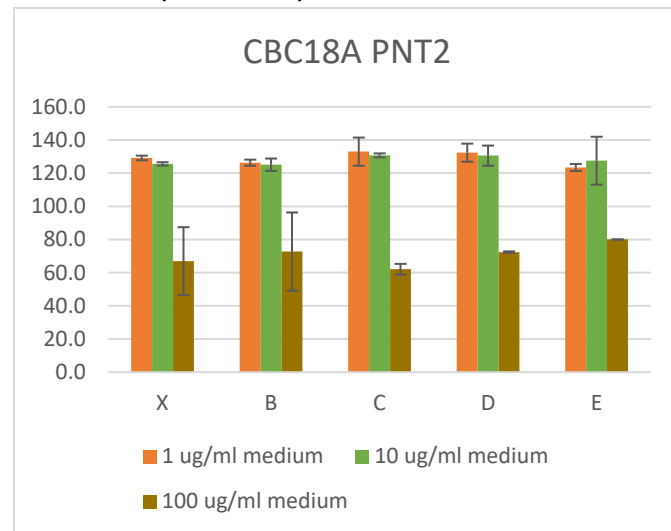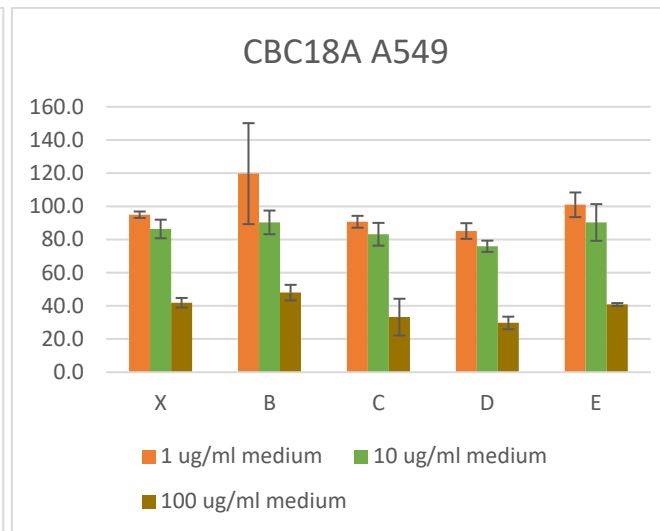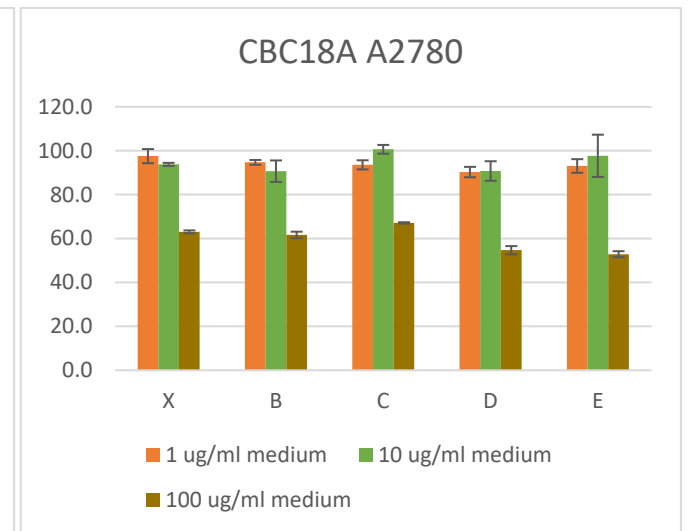

## CBC 19 A: (Chordata)

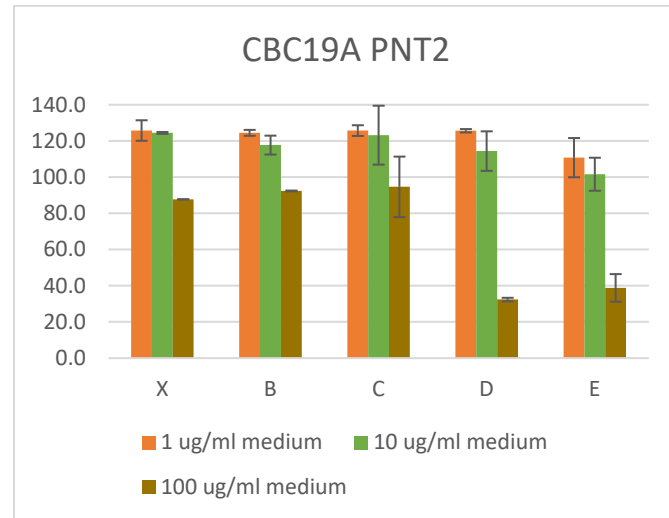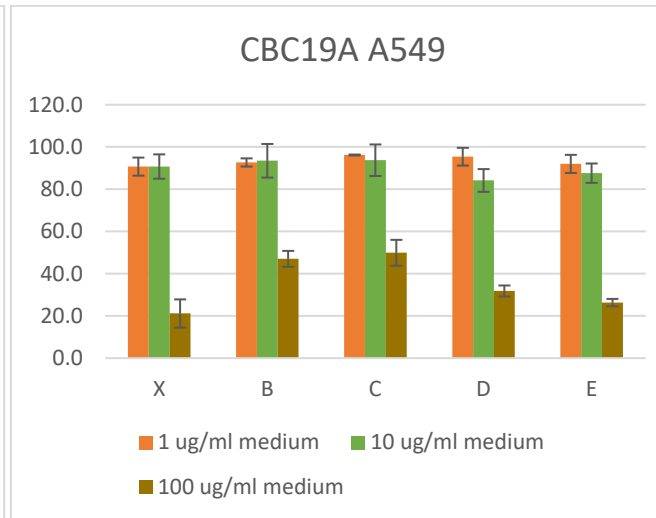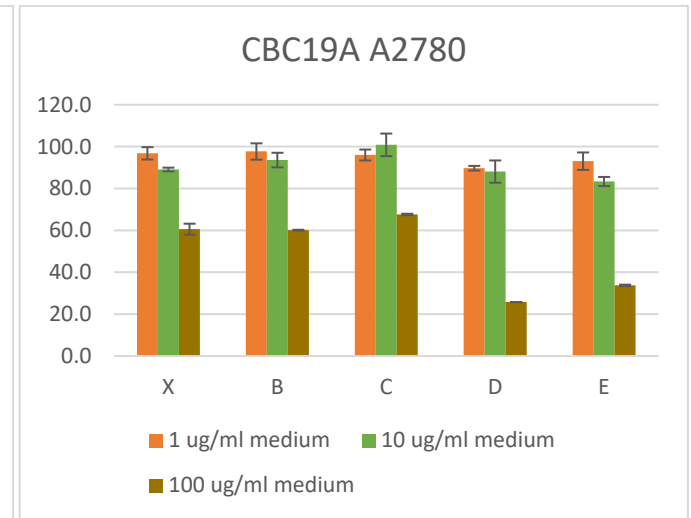

## CBC 20 A: (Chlorophyta)

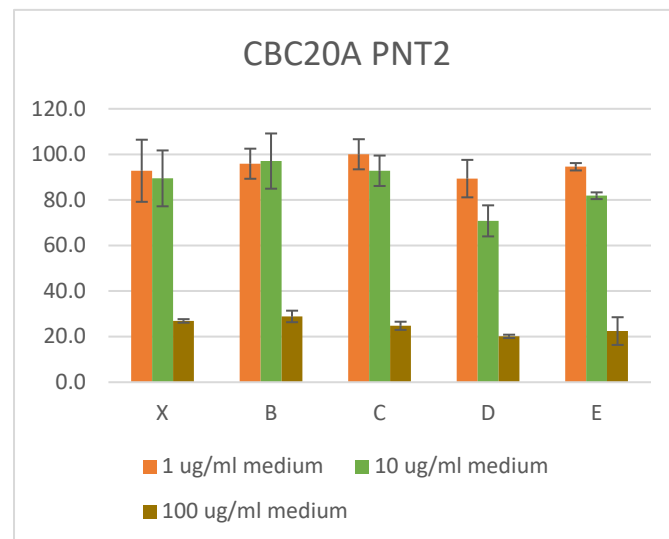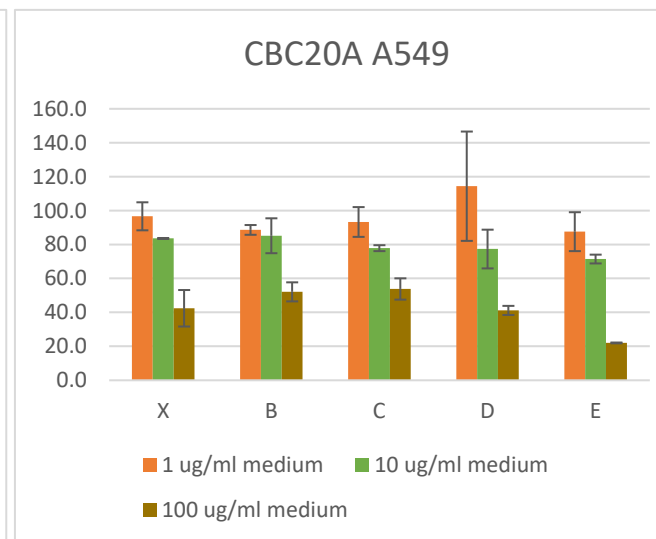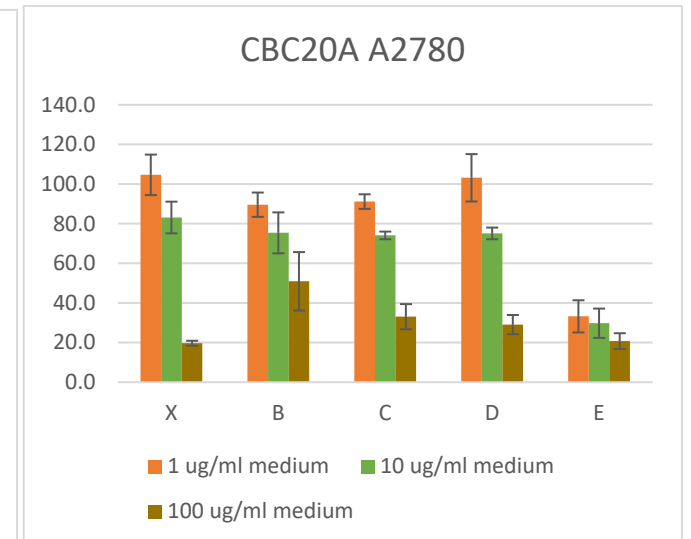



CBC 21 A: (Haptophyta)

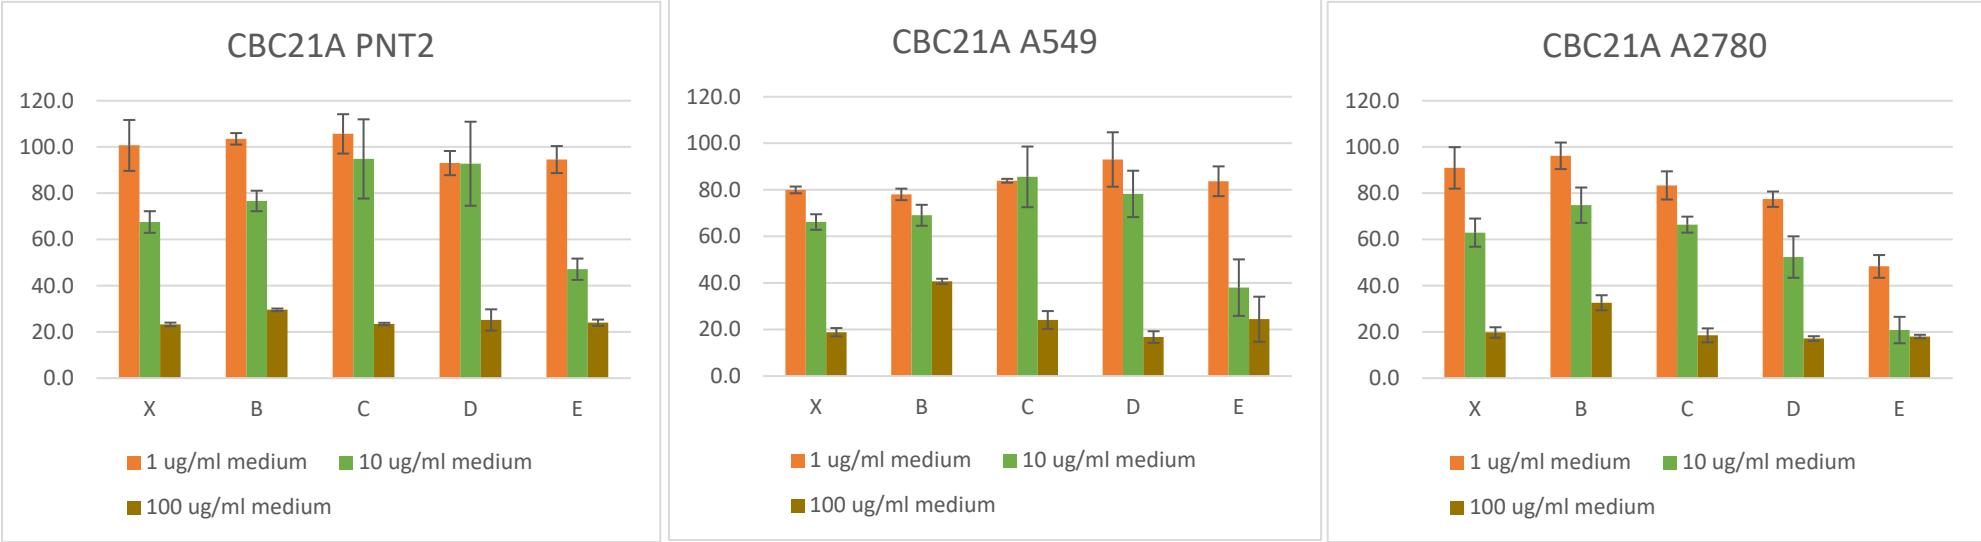

CBC 22 A: (Chordata)

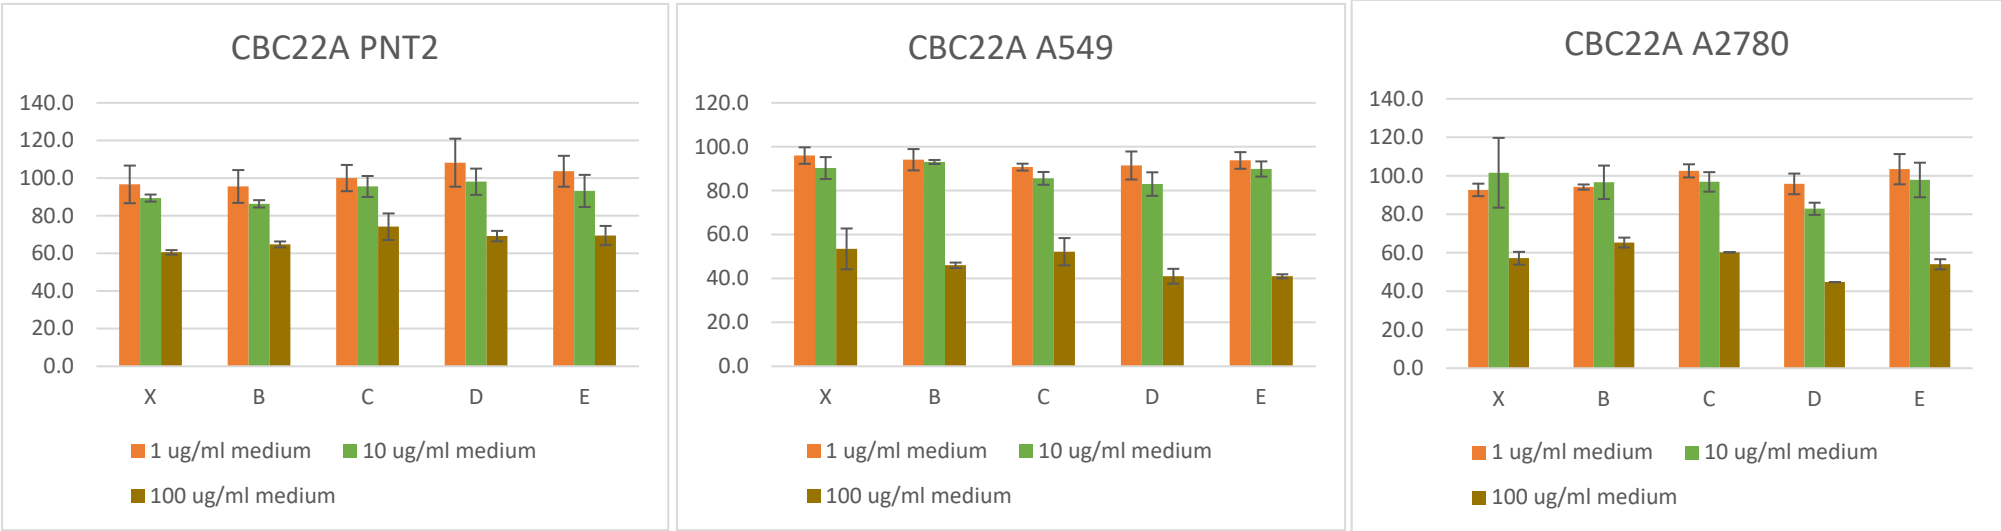

## CBC 23 A: (Cnidaria)

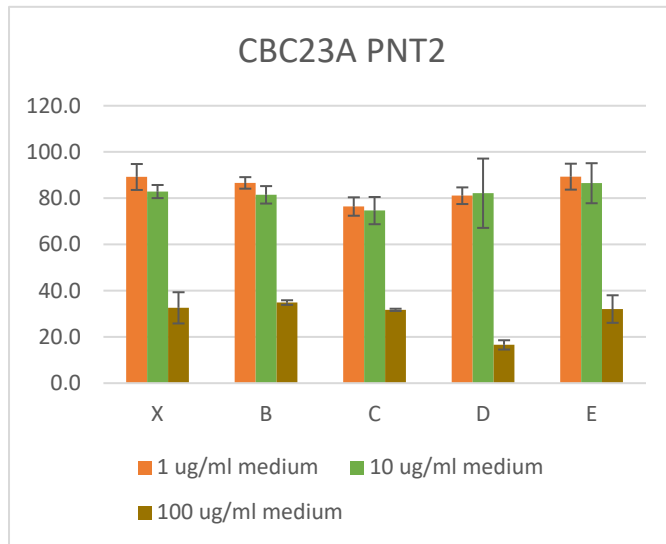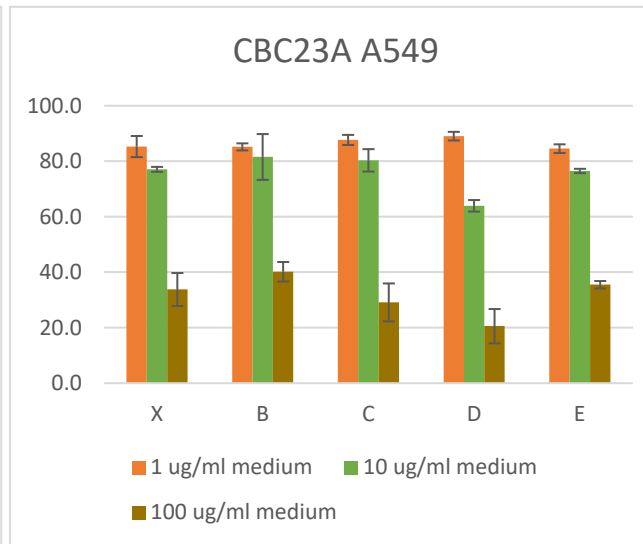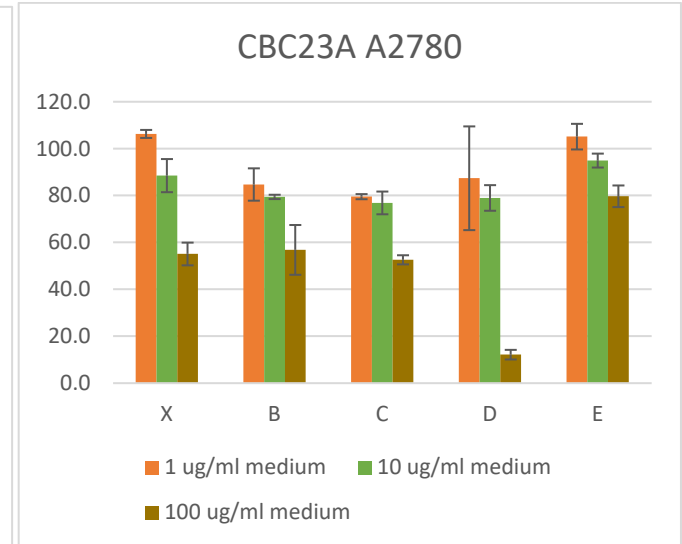

## CBC 24 A: (Ochrophyta)

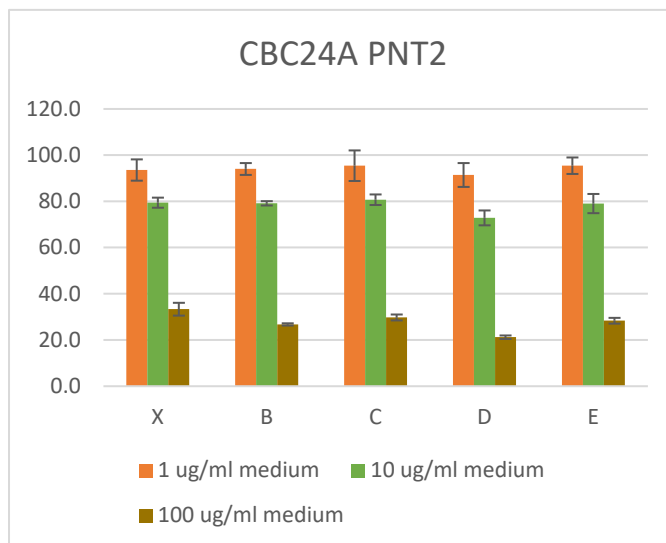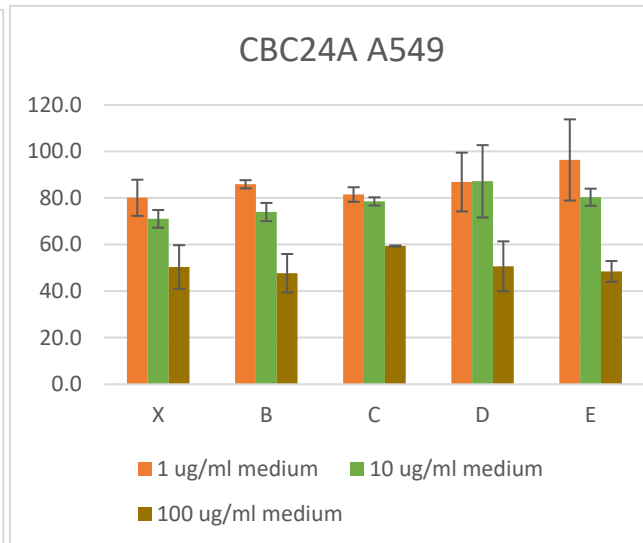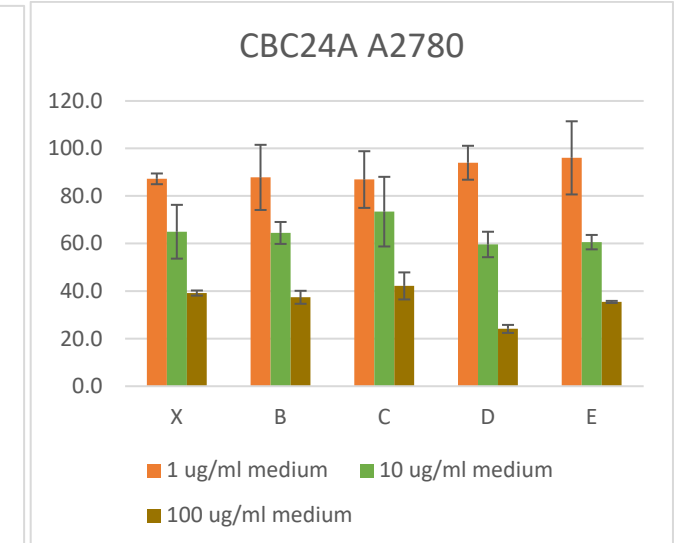

## CBC 25 A: (Bacillariophyta)

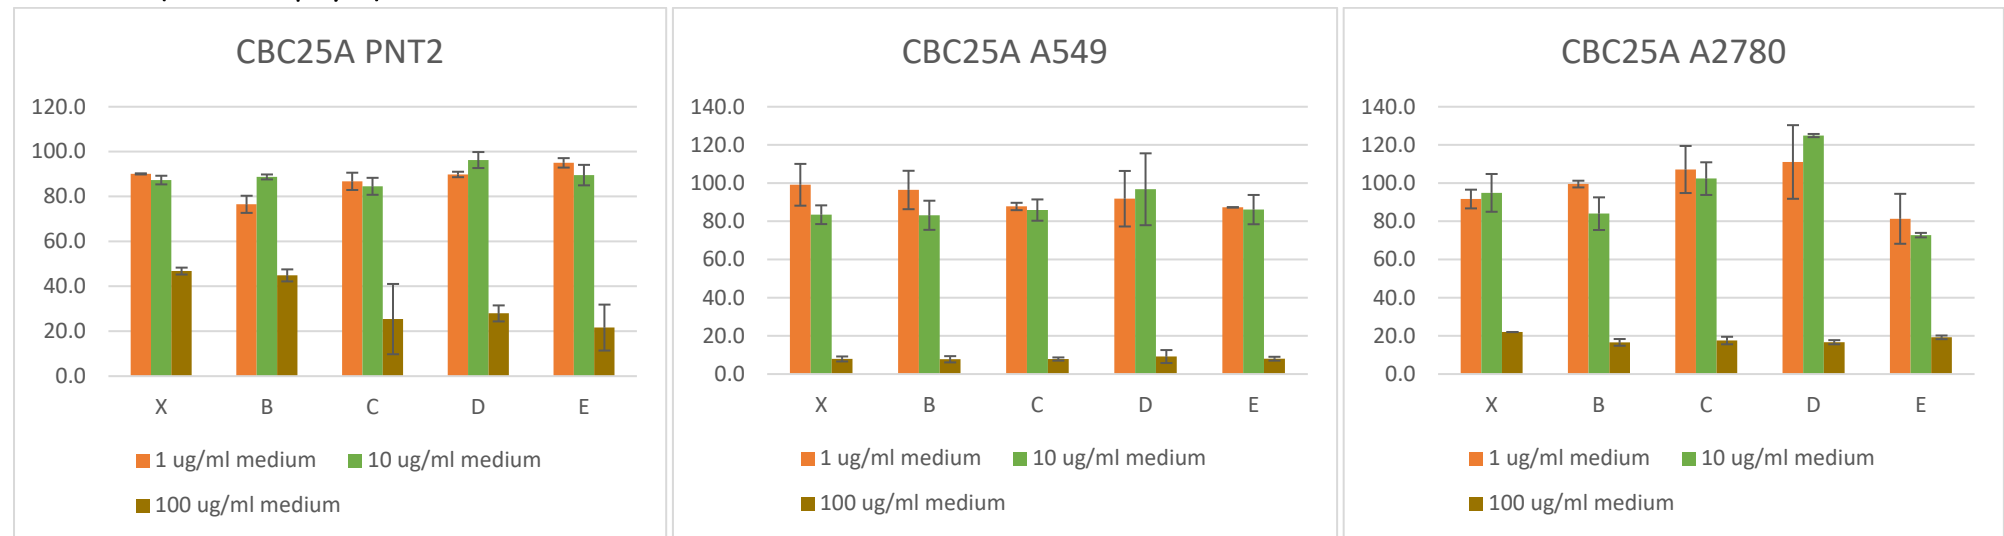

## CBC 26 A: (Mollusca)

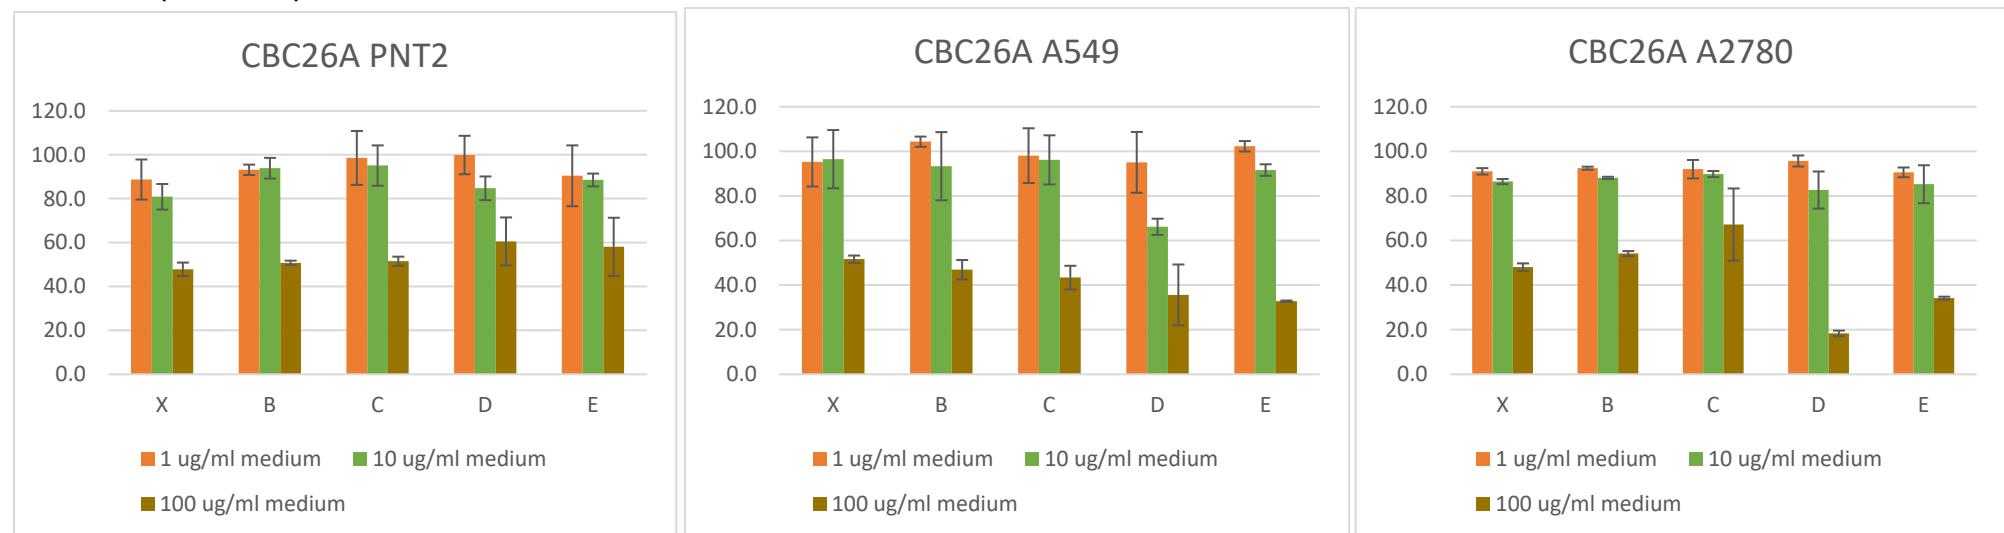

## CBC 27 A: (Chlorophyta)

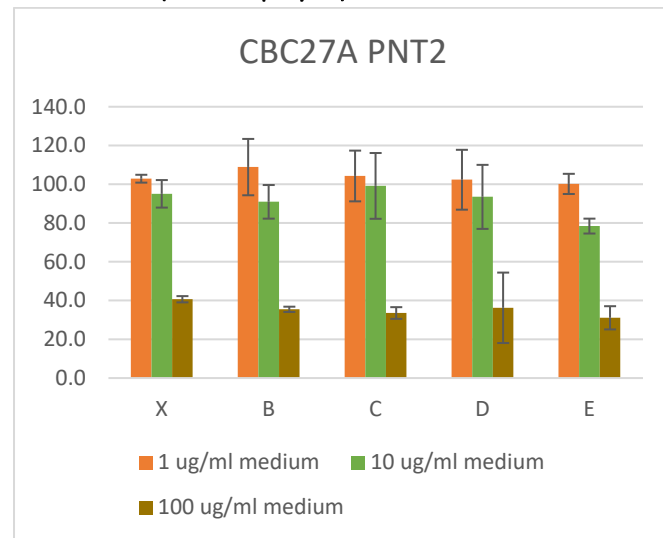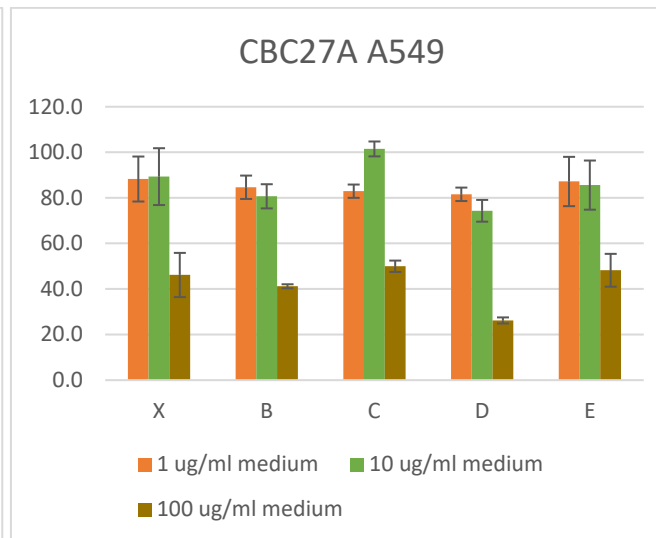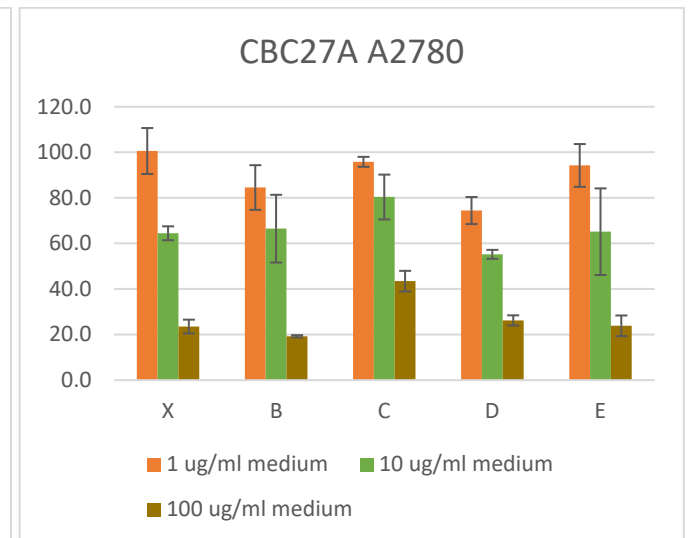

## CBC 28 A: (Briozoa)

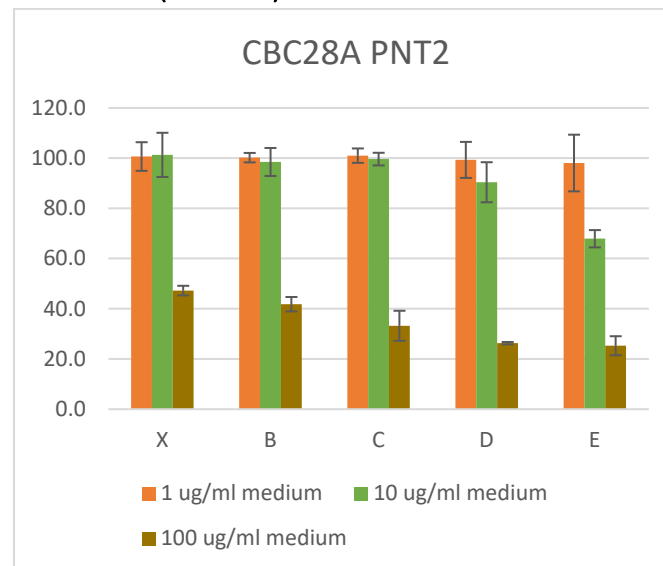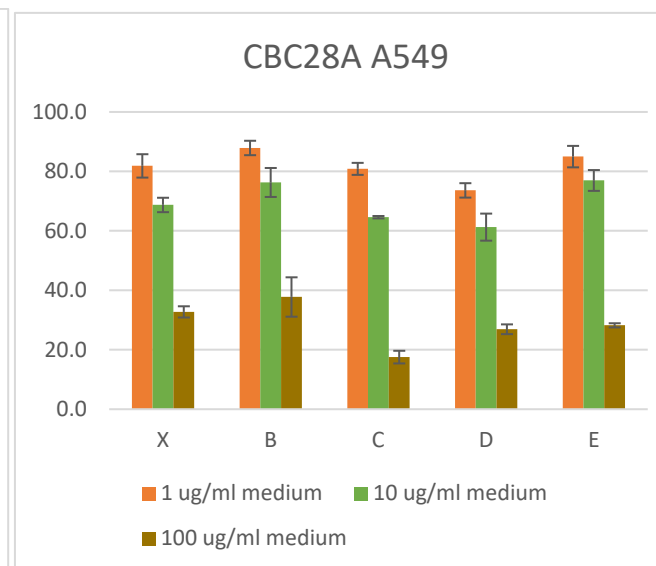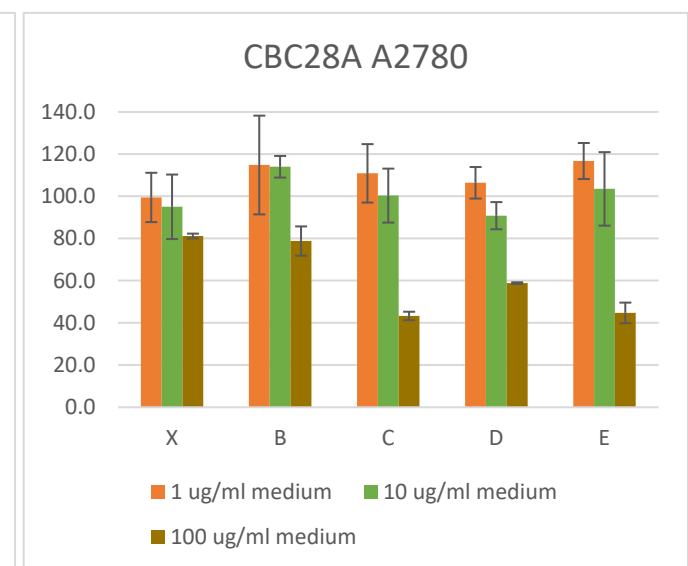

## CBC 29 A: (Chordata)

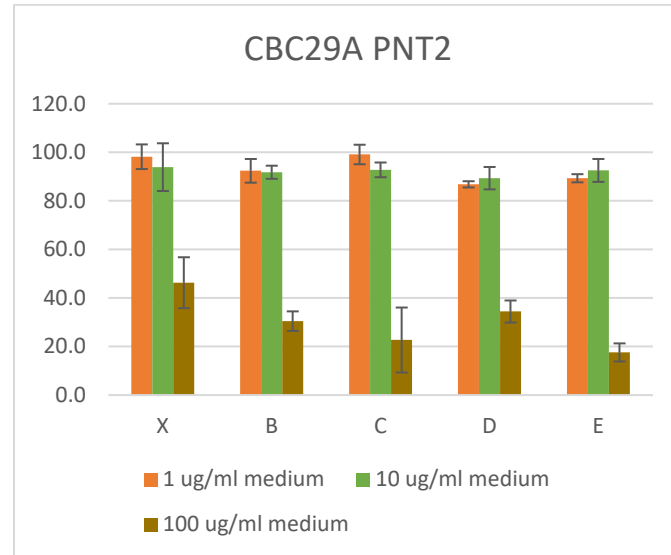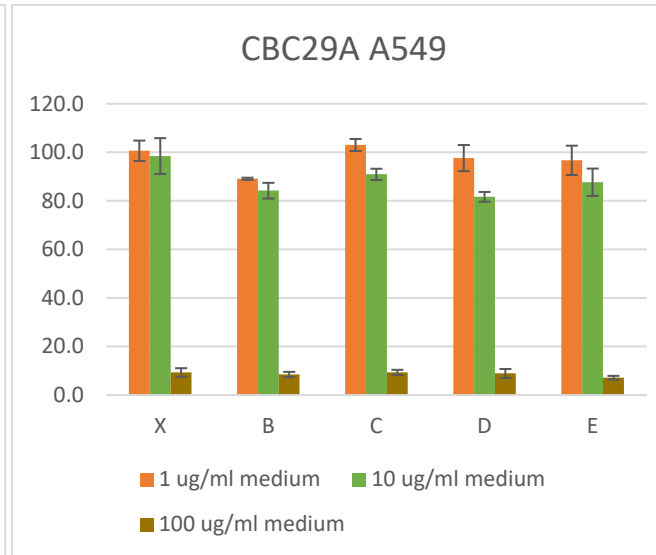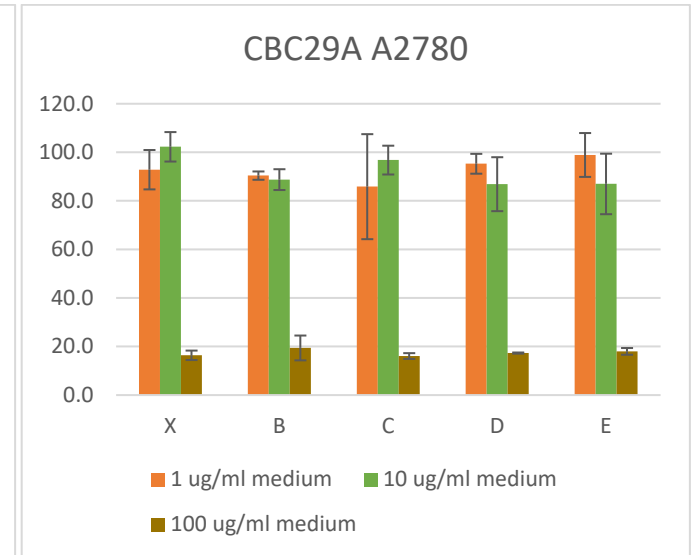

## CBC 30 A: (Briozoa)

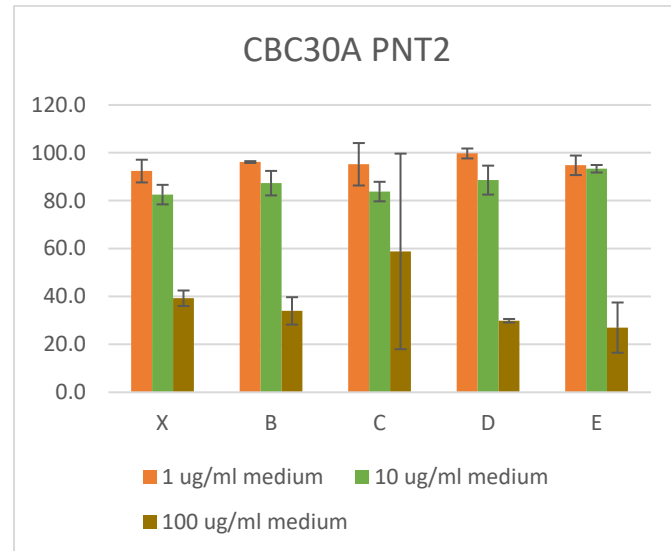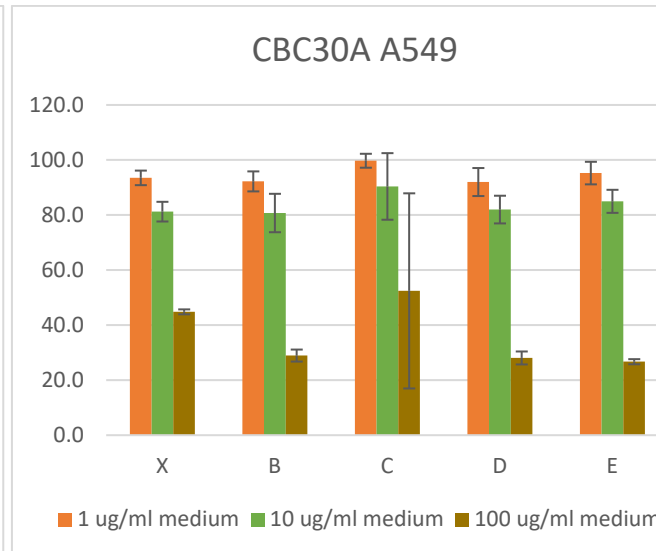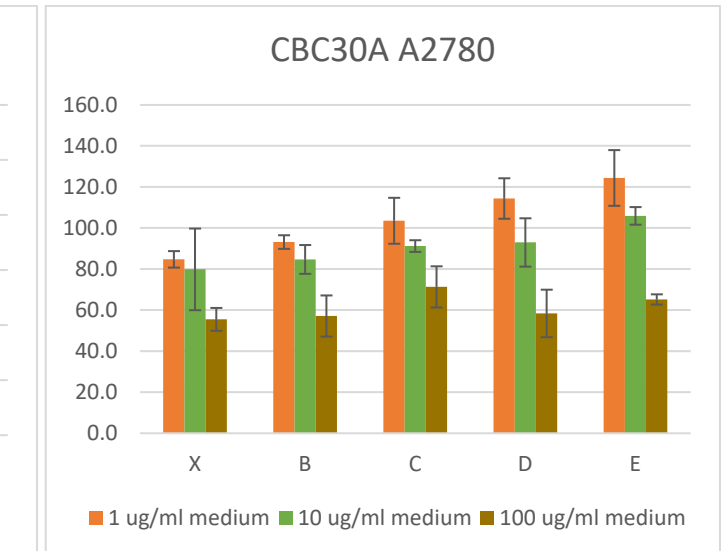

## CBC 31 A: (Briozoa)

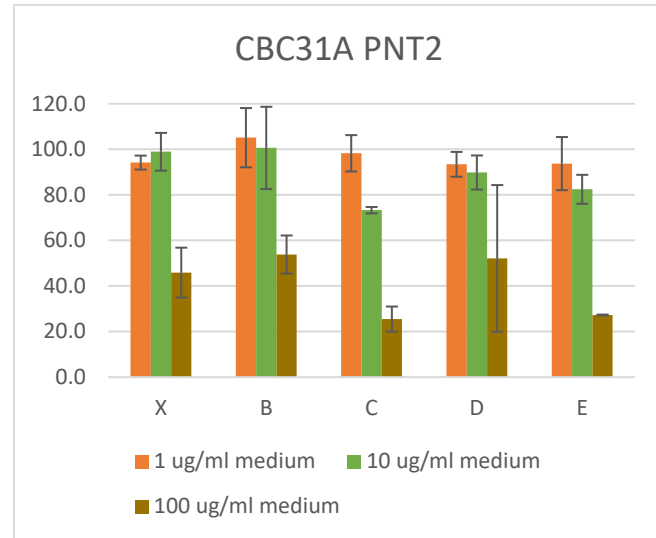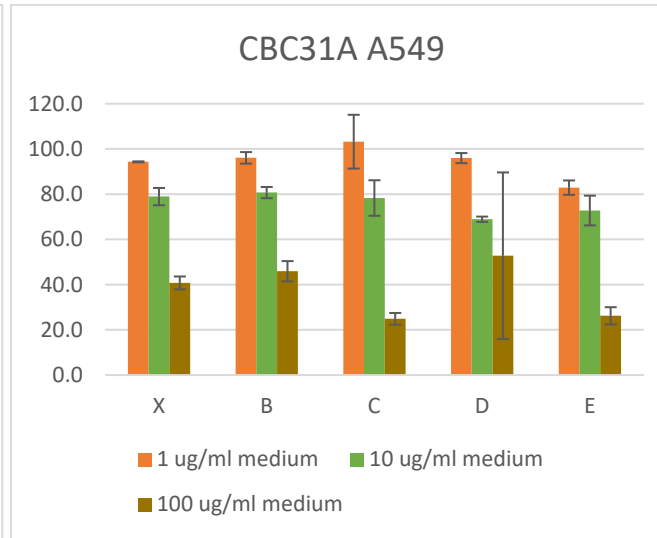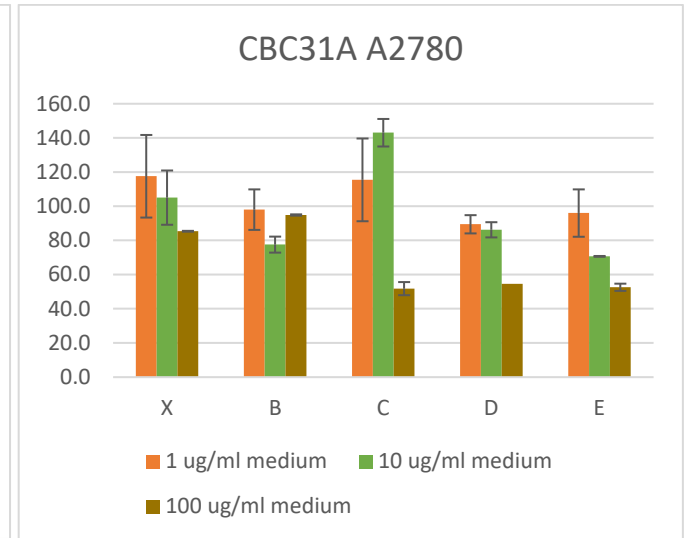

## CBC 32 A: (Porifera)

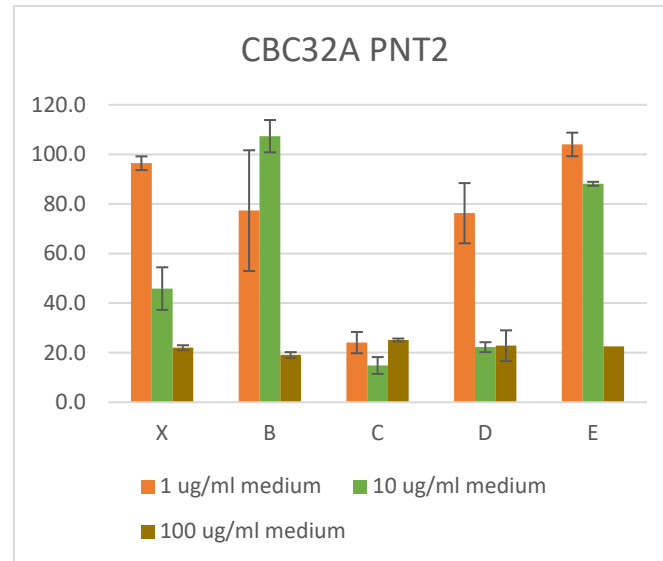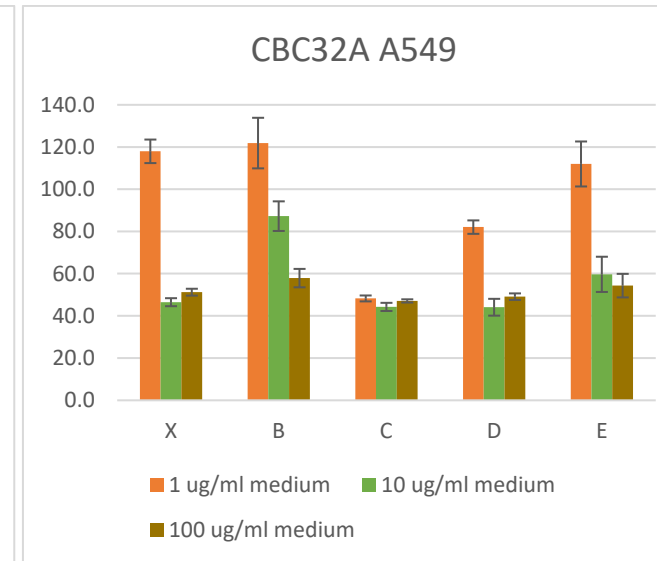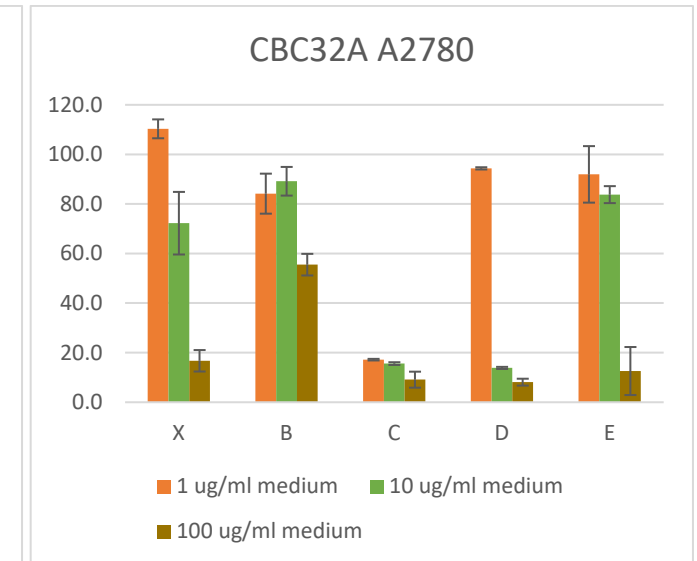

## CBC 33 A: (Chlorophyta)

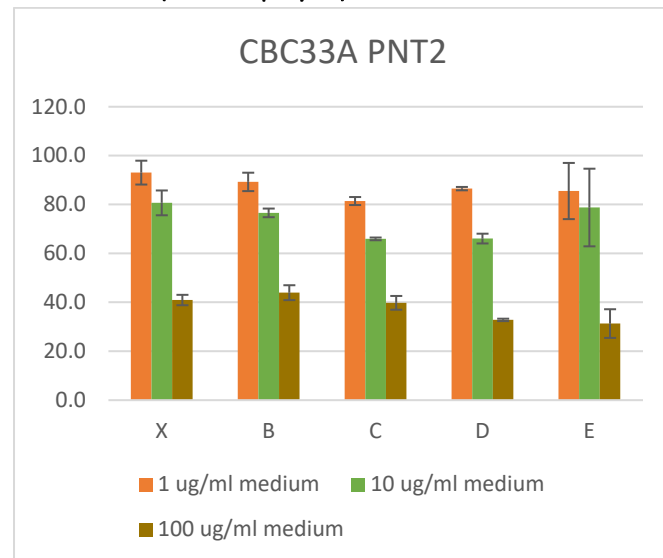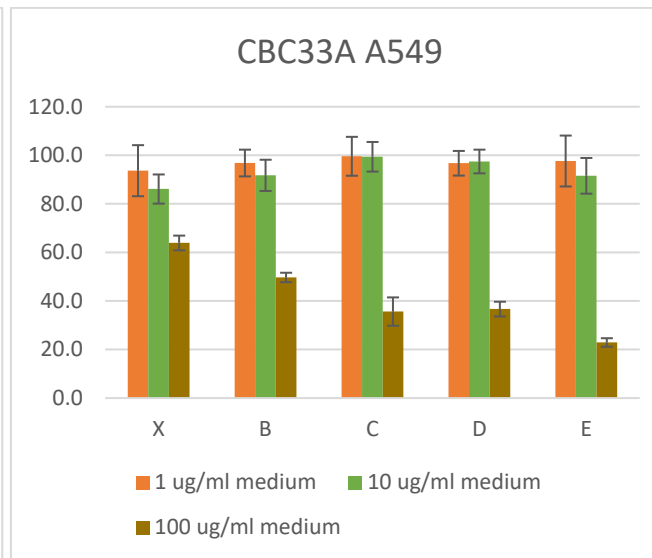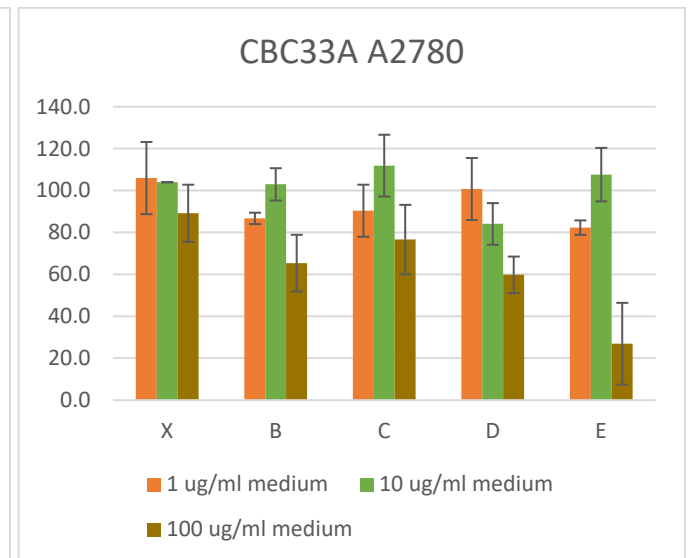

## CBC 34 A: (Mollusca)

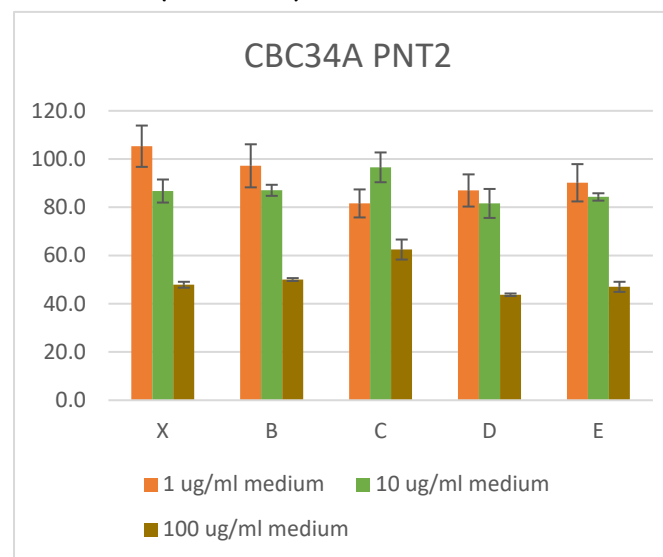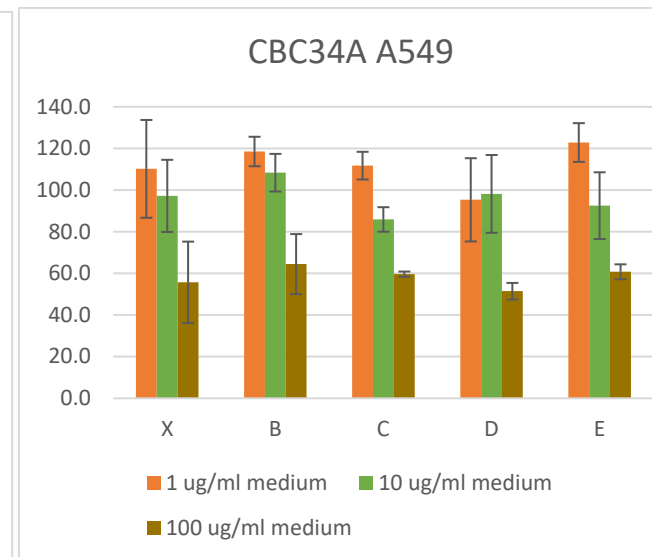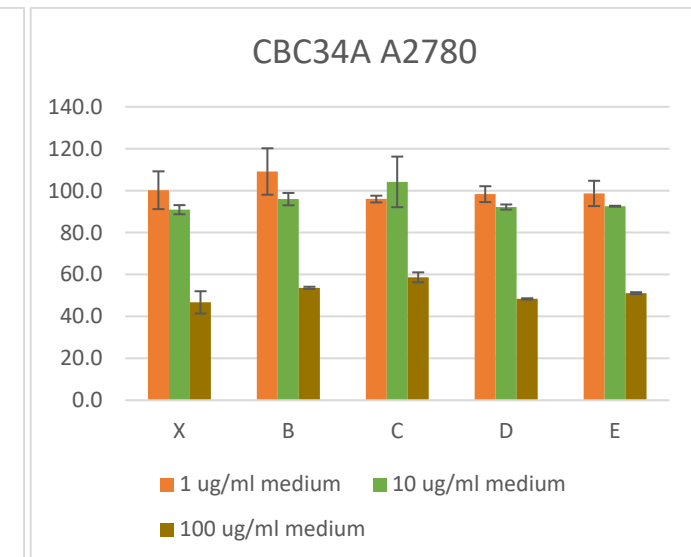

## CBC 35 A: (Miozoa)

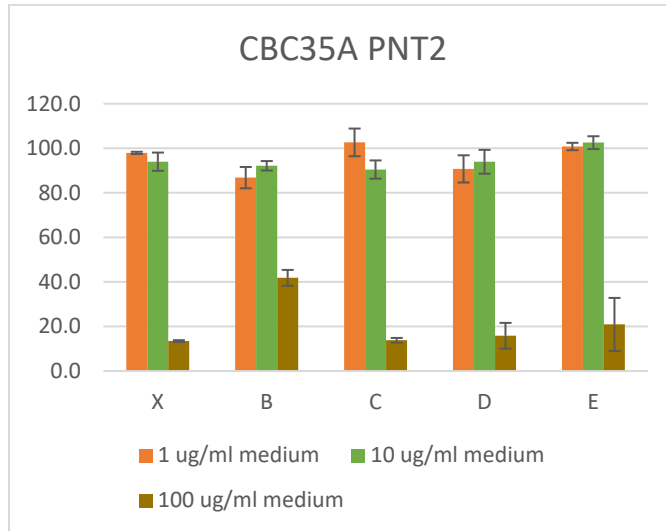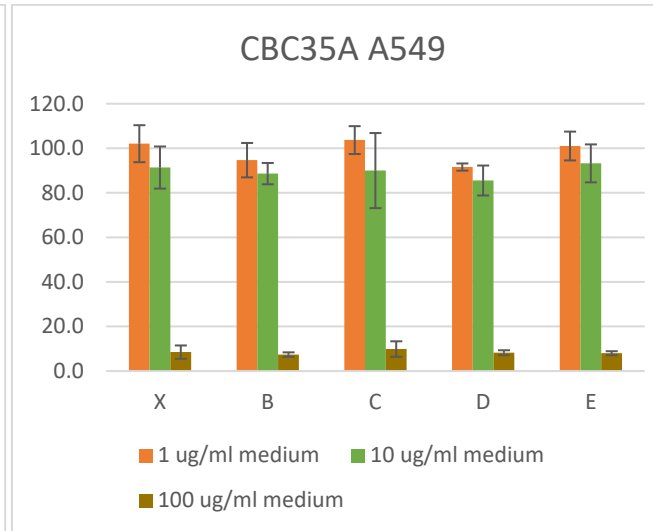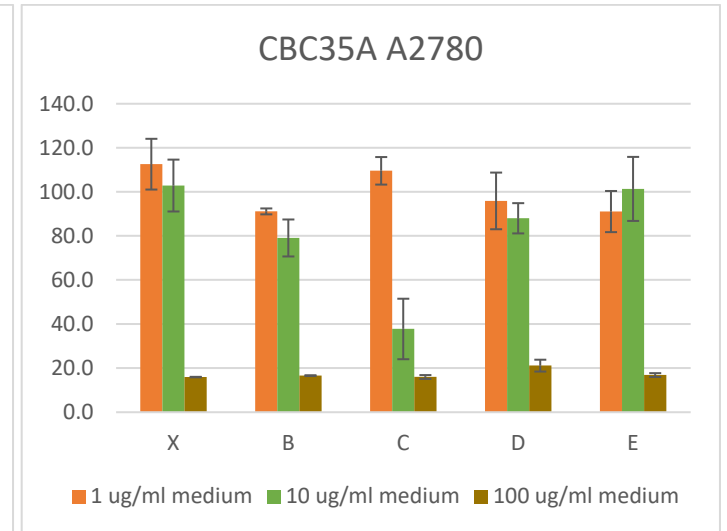

## CBC 36 A: (Bacillariophyta)

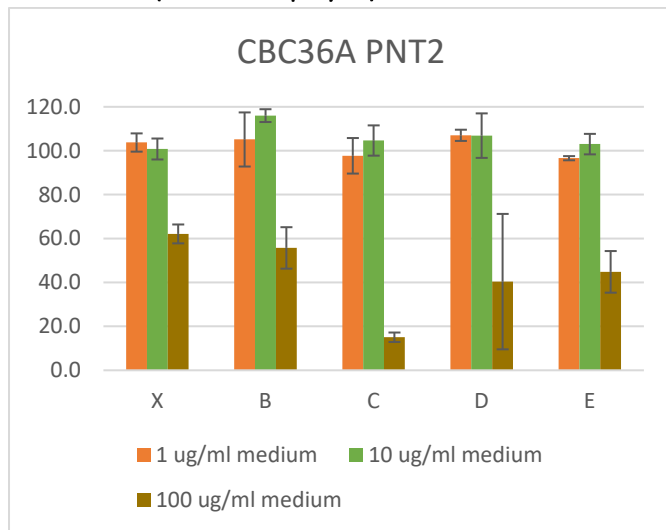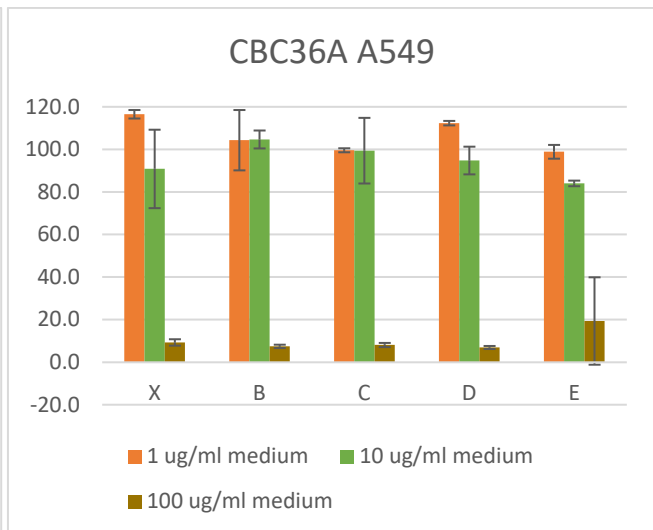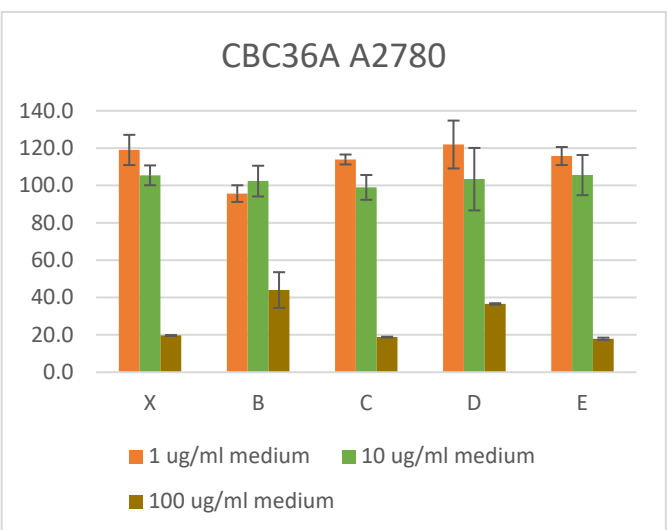



## CBC 37 A: (Chordata)

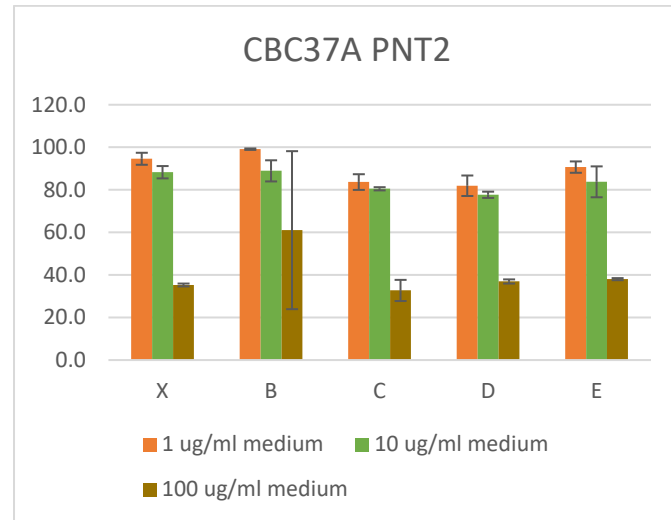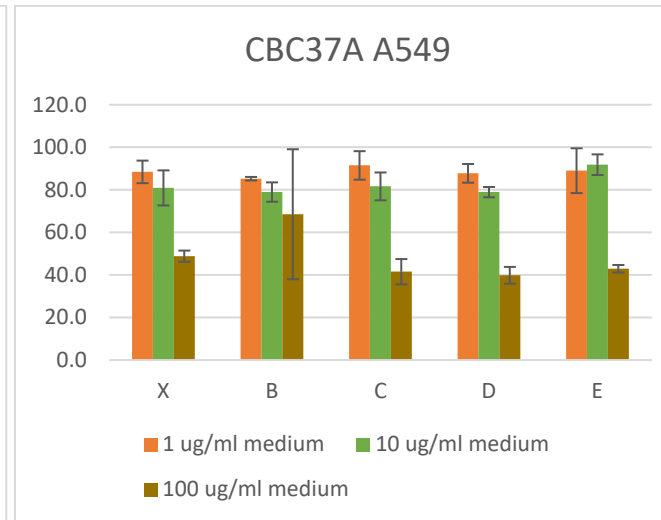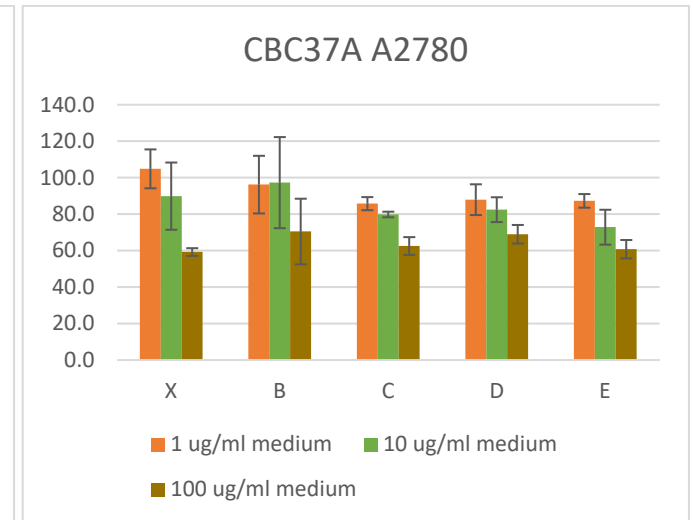

## CBC 38 A: (Mollusca)

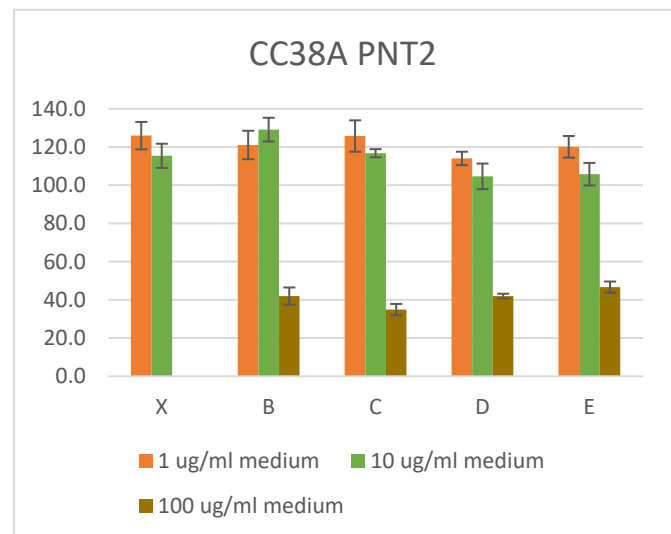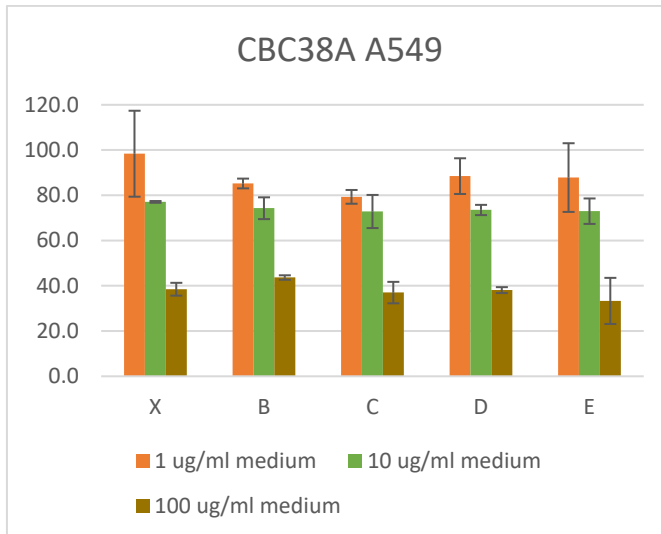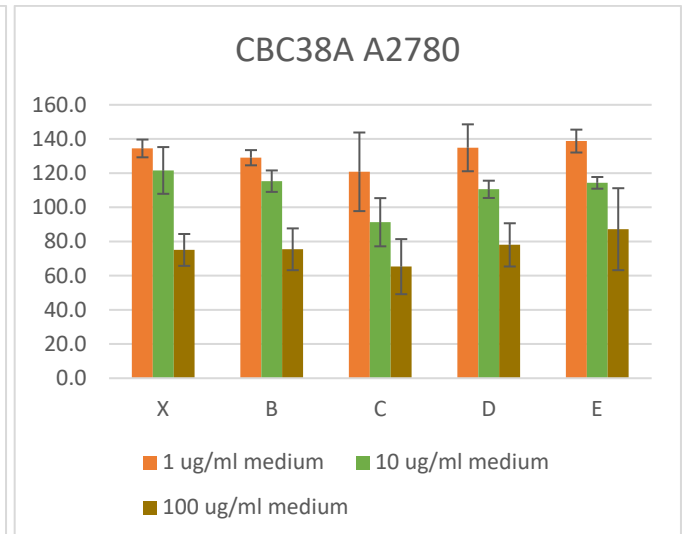

## CBC 39 A: (Miozoa)

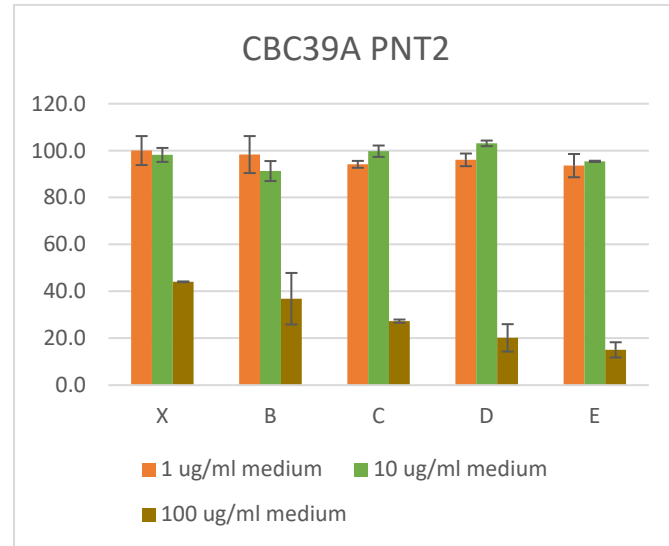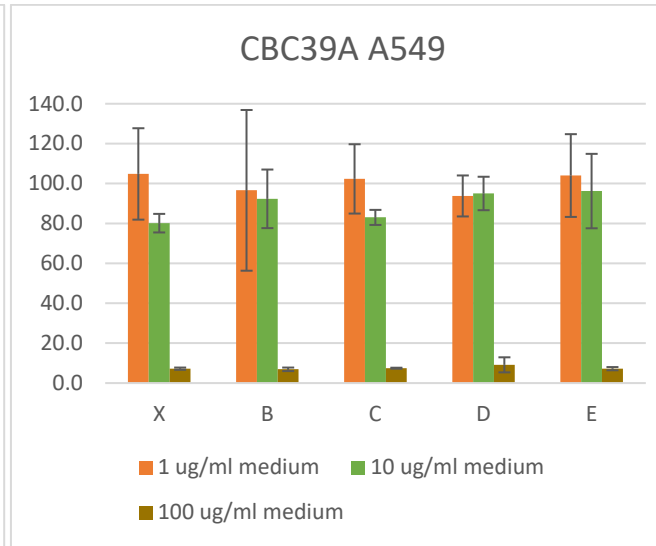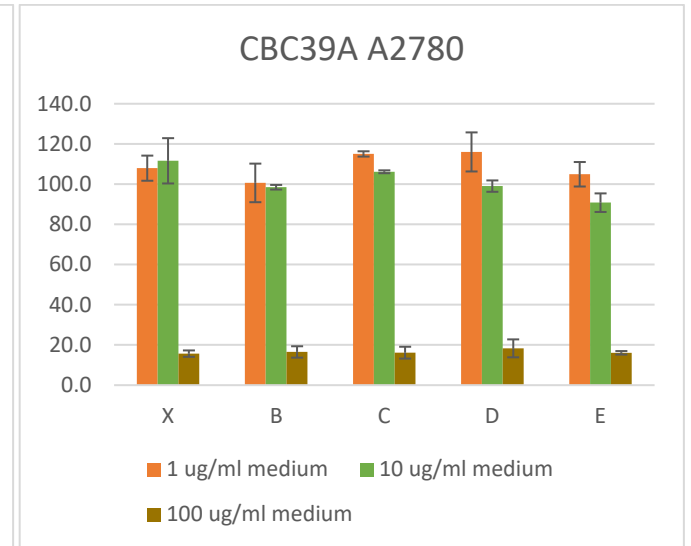

## CBC 40 A: (Bacillariophyta)

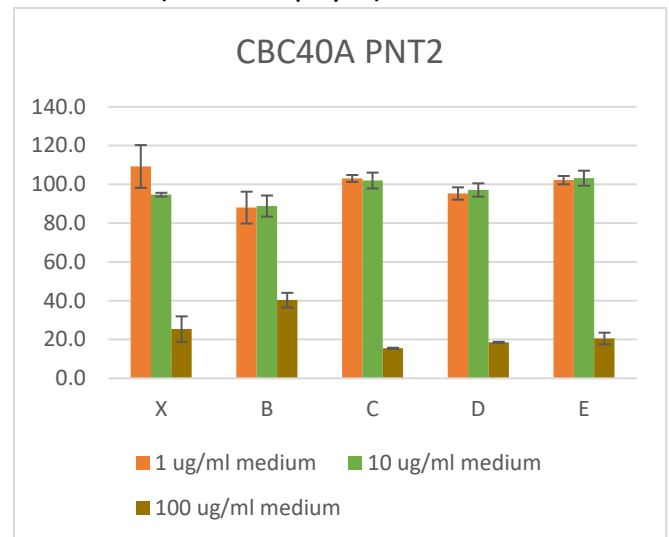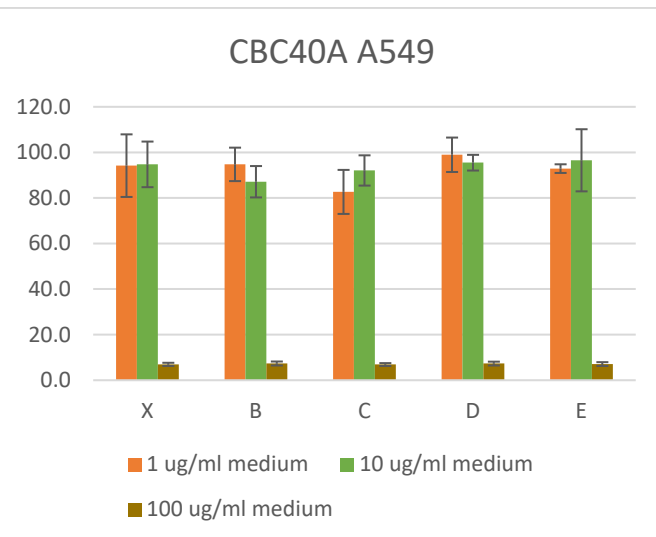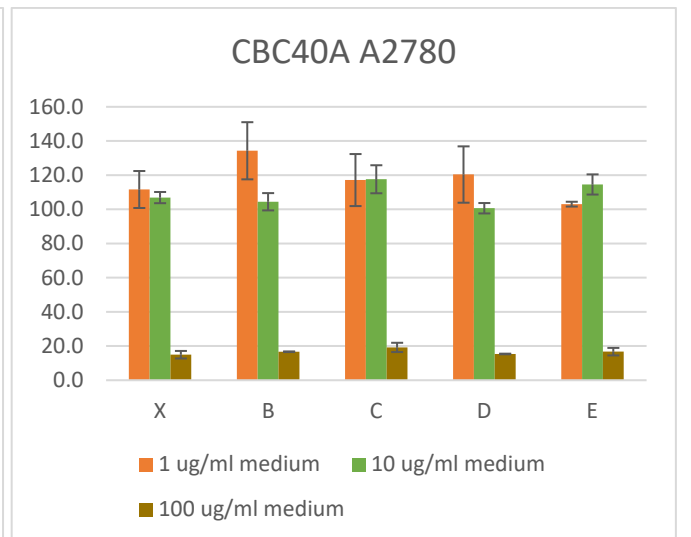

## CBC 41 A: (Bacillariophyta)

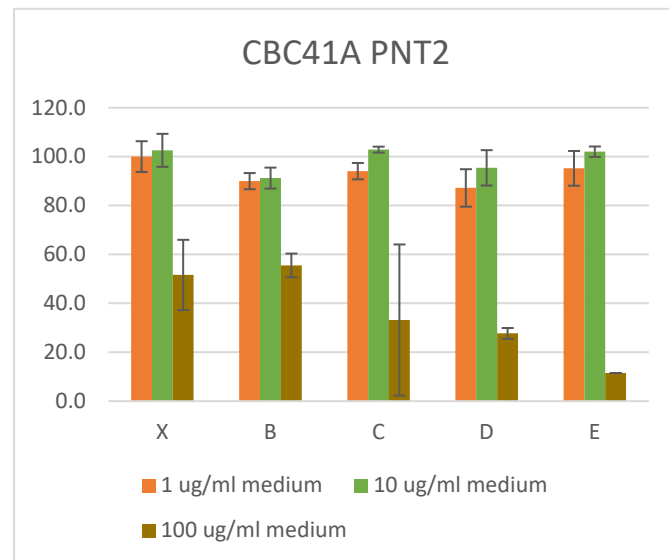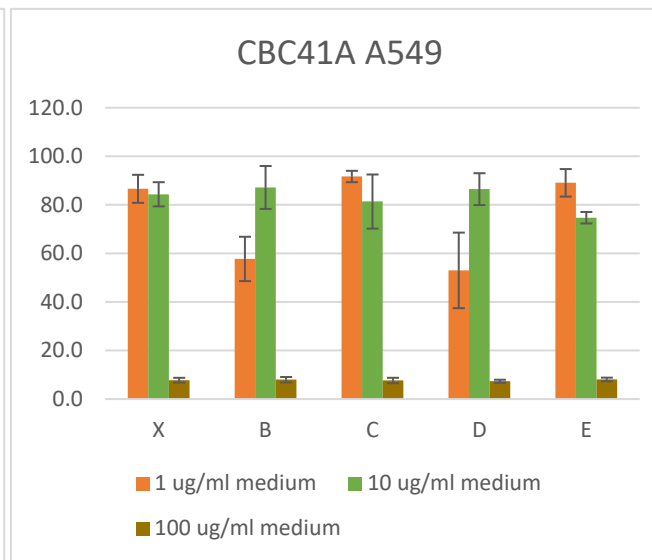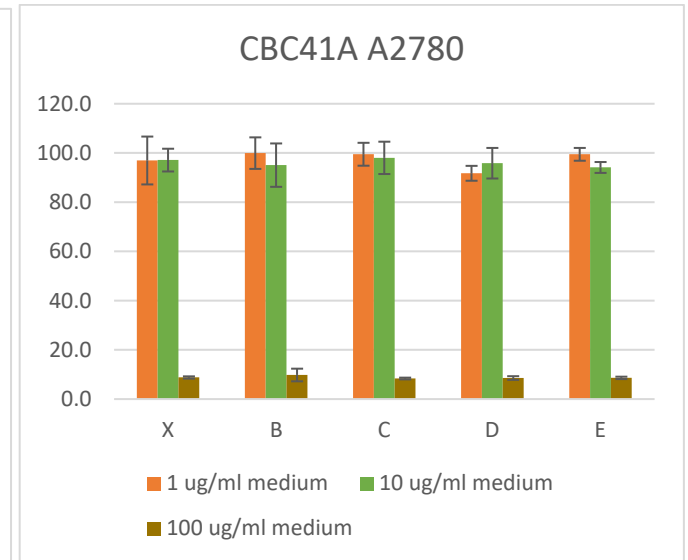

## CBC 42 A: (Bacillariophyta)

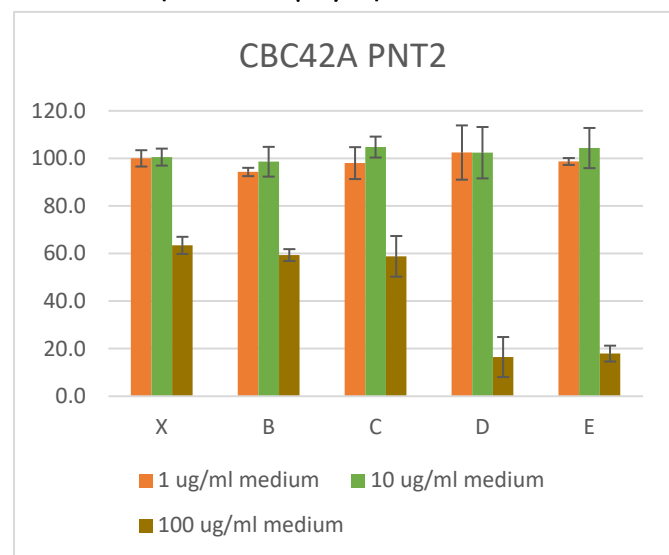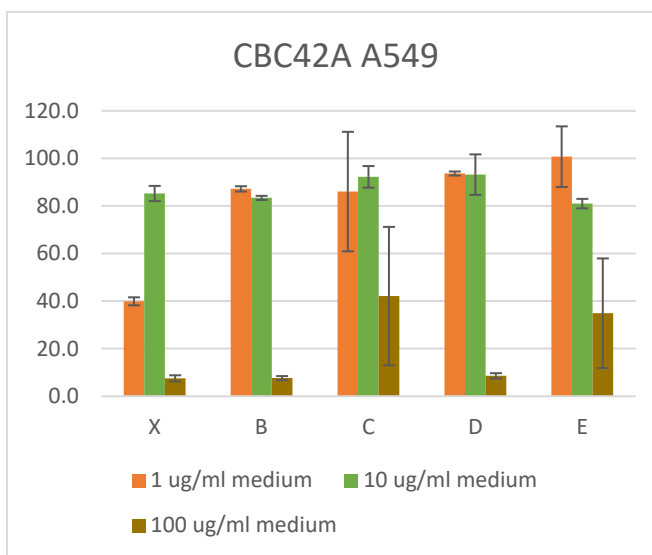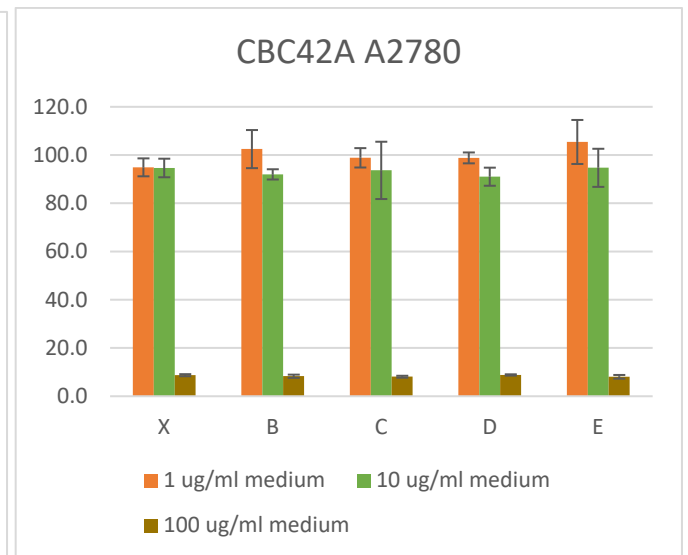

## CBC 43 A: (Rhodophyta)

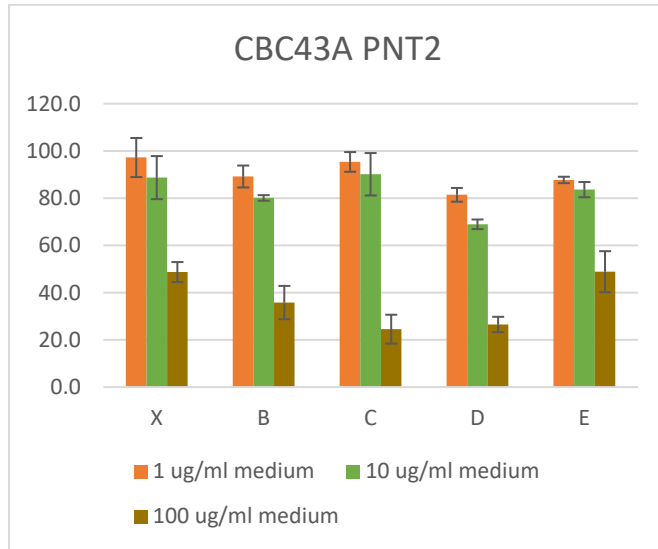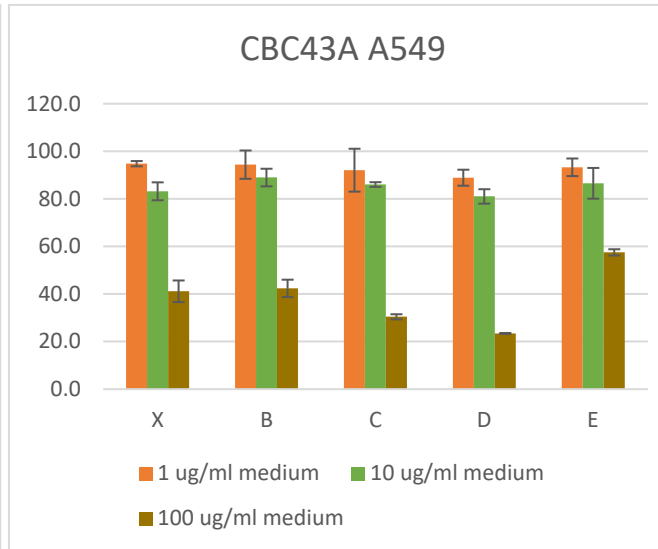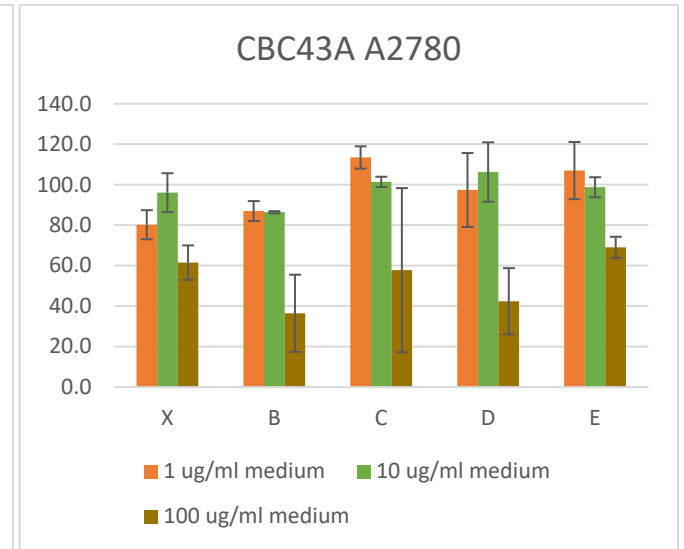

## CBC 44 A: (Briozoa)

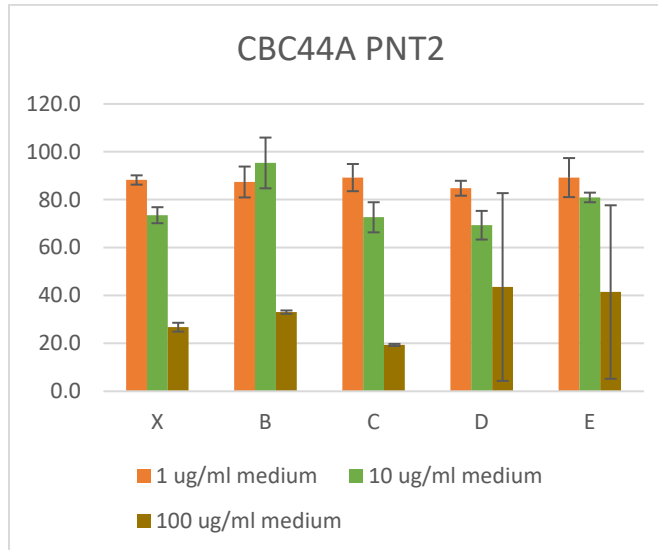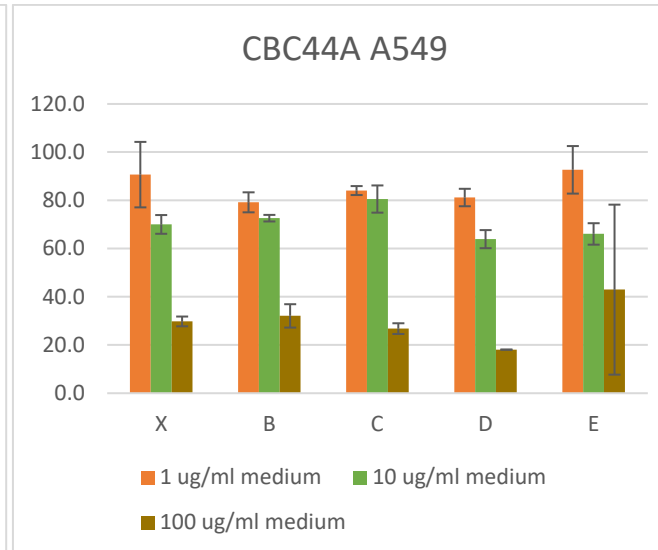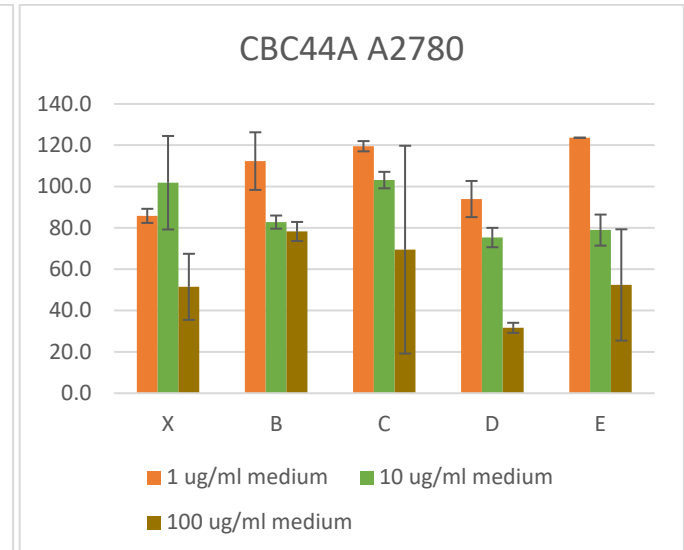

## CBC 45 A: (Ochrophyta)

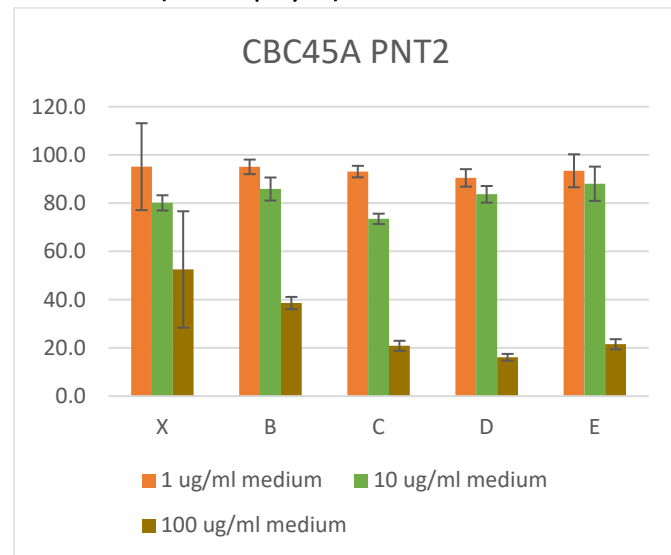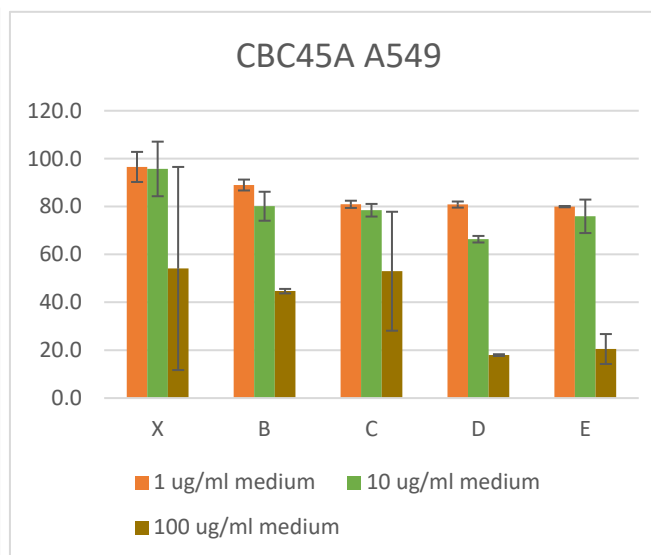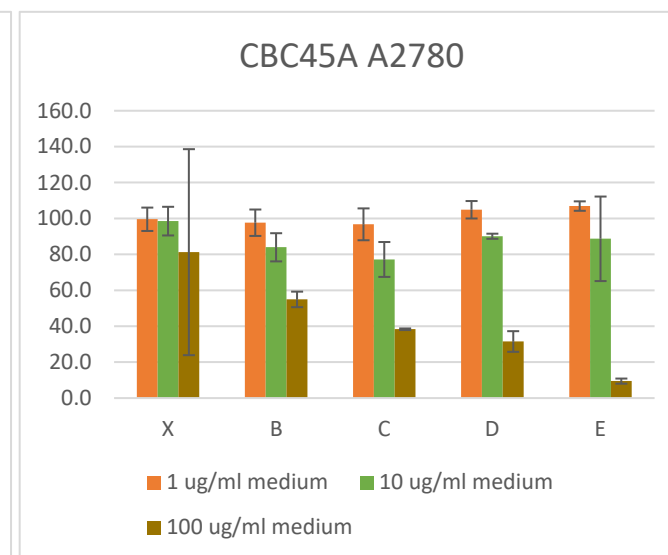

## CBC 46 A: (Mollusca)

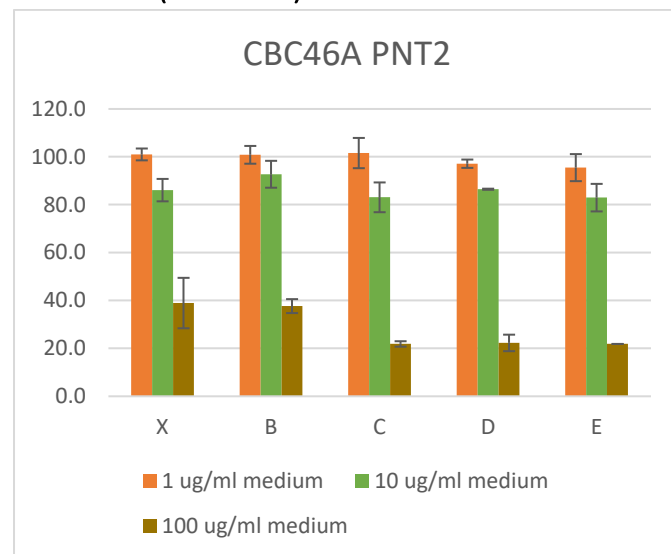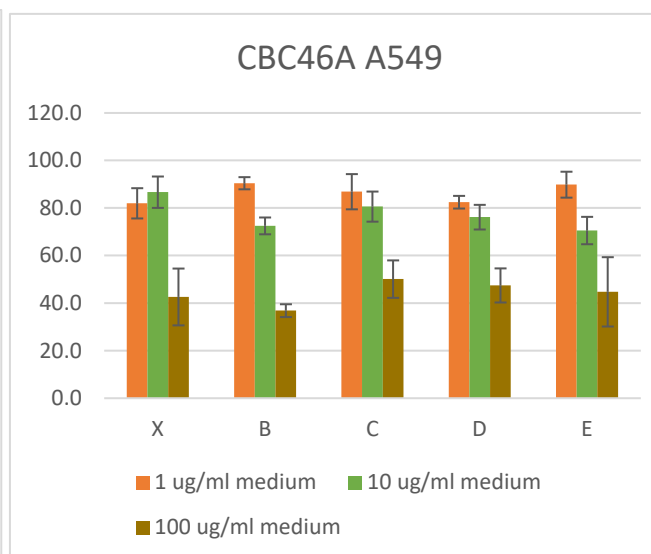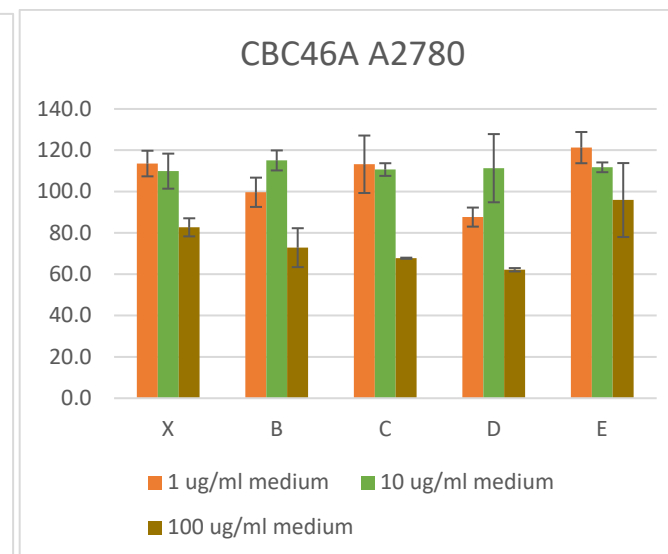

CBC 46 C: (Mollusca)

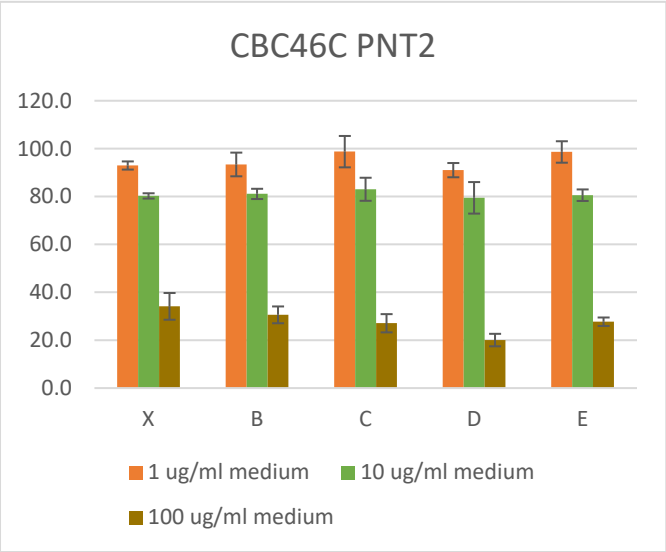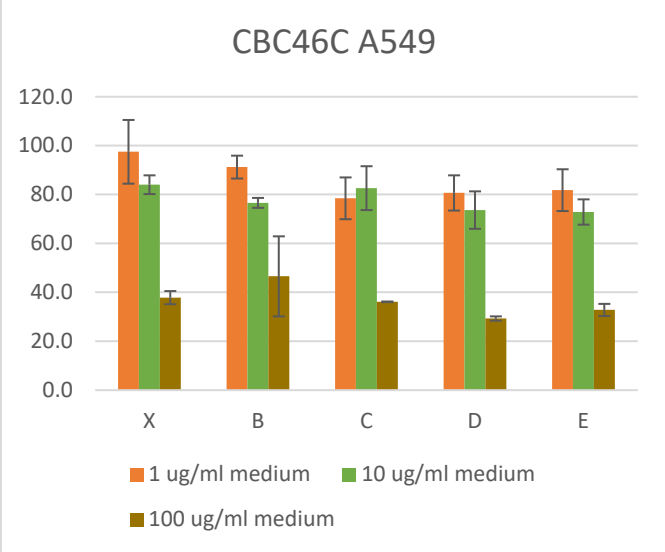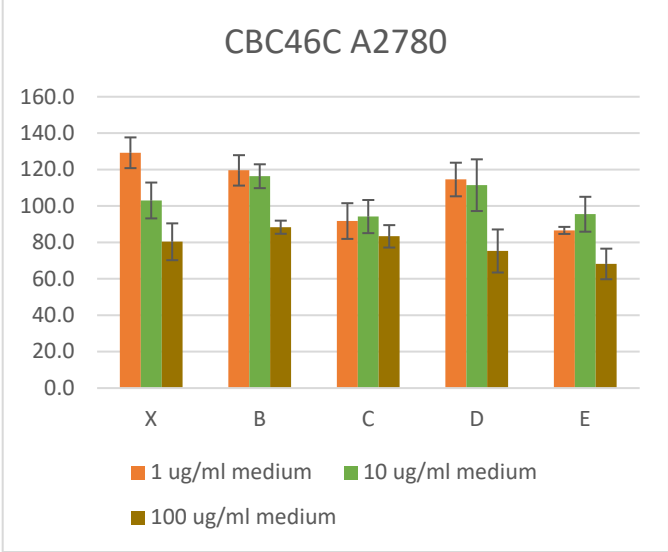

CBC 47 A: (Mollusca)

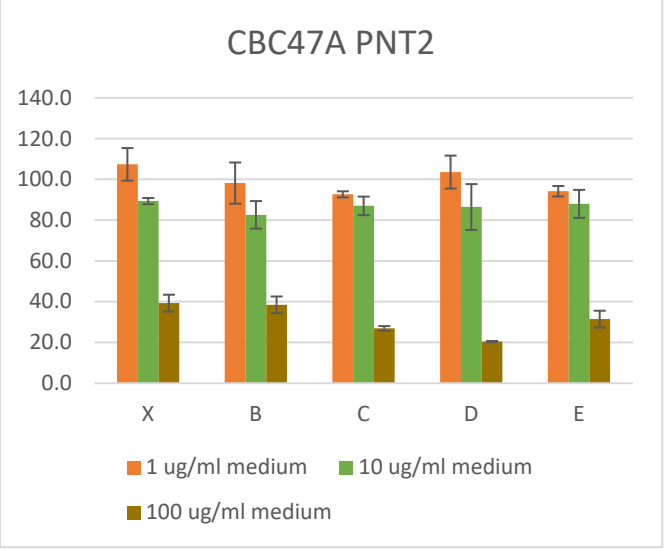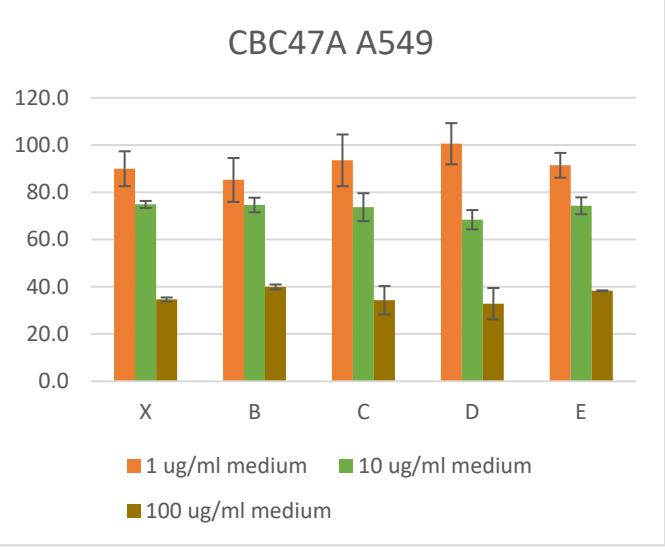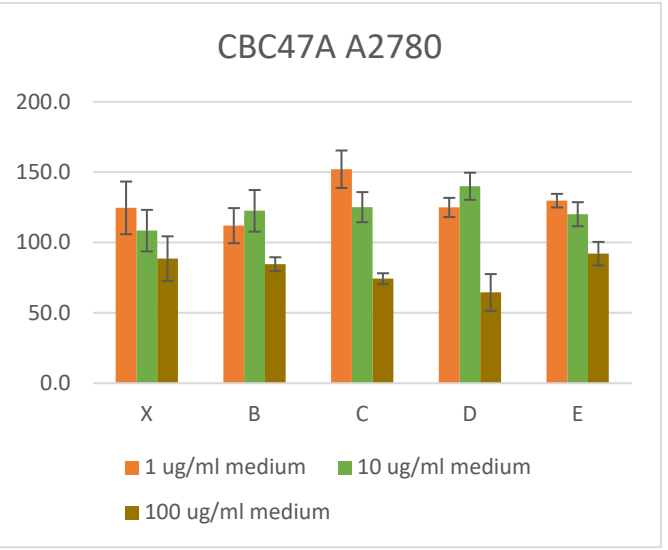

CBC 48 A: (Briozoa)

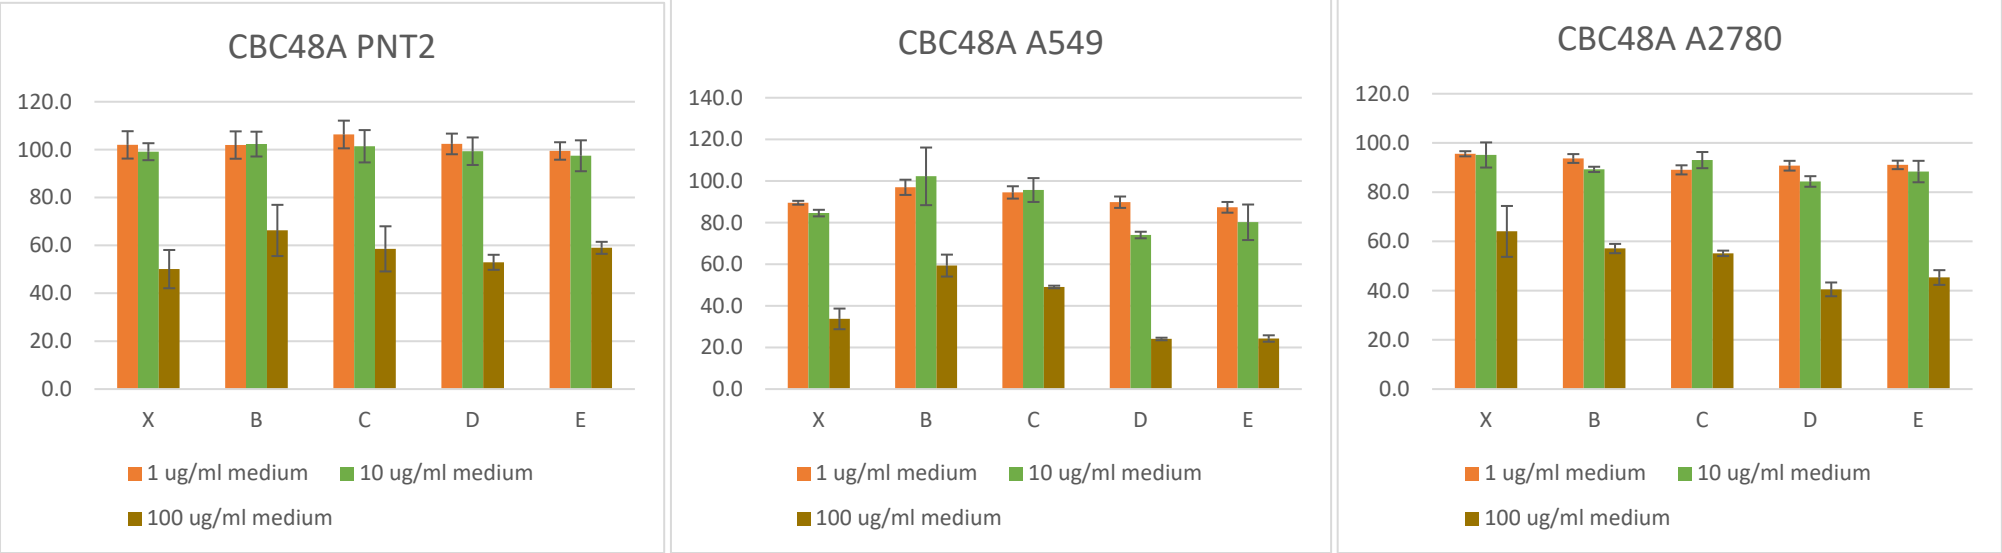

CBC 49 A: (Ochrophyta)

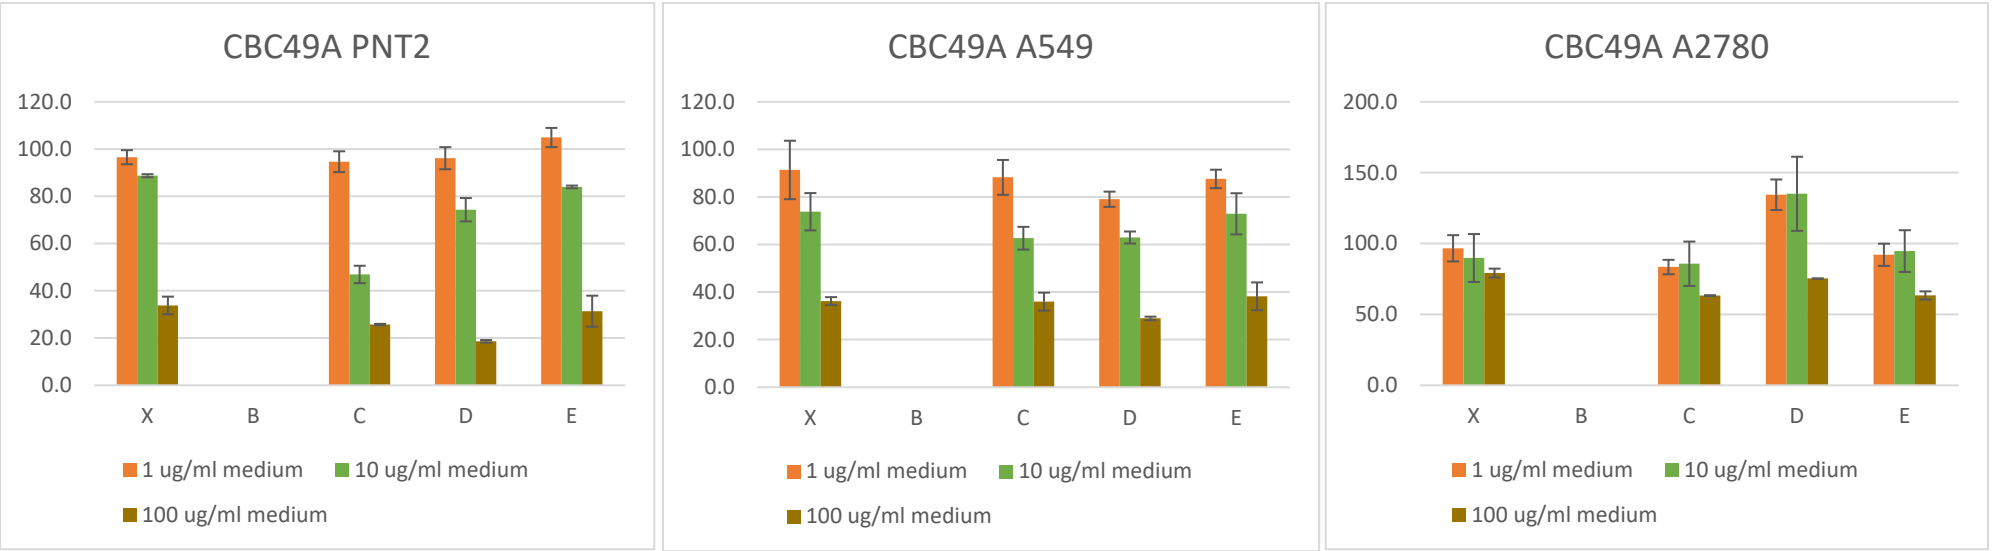

CBC 50 A: (Chordata)

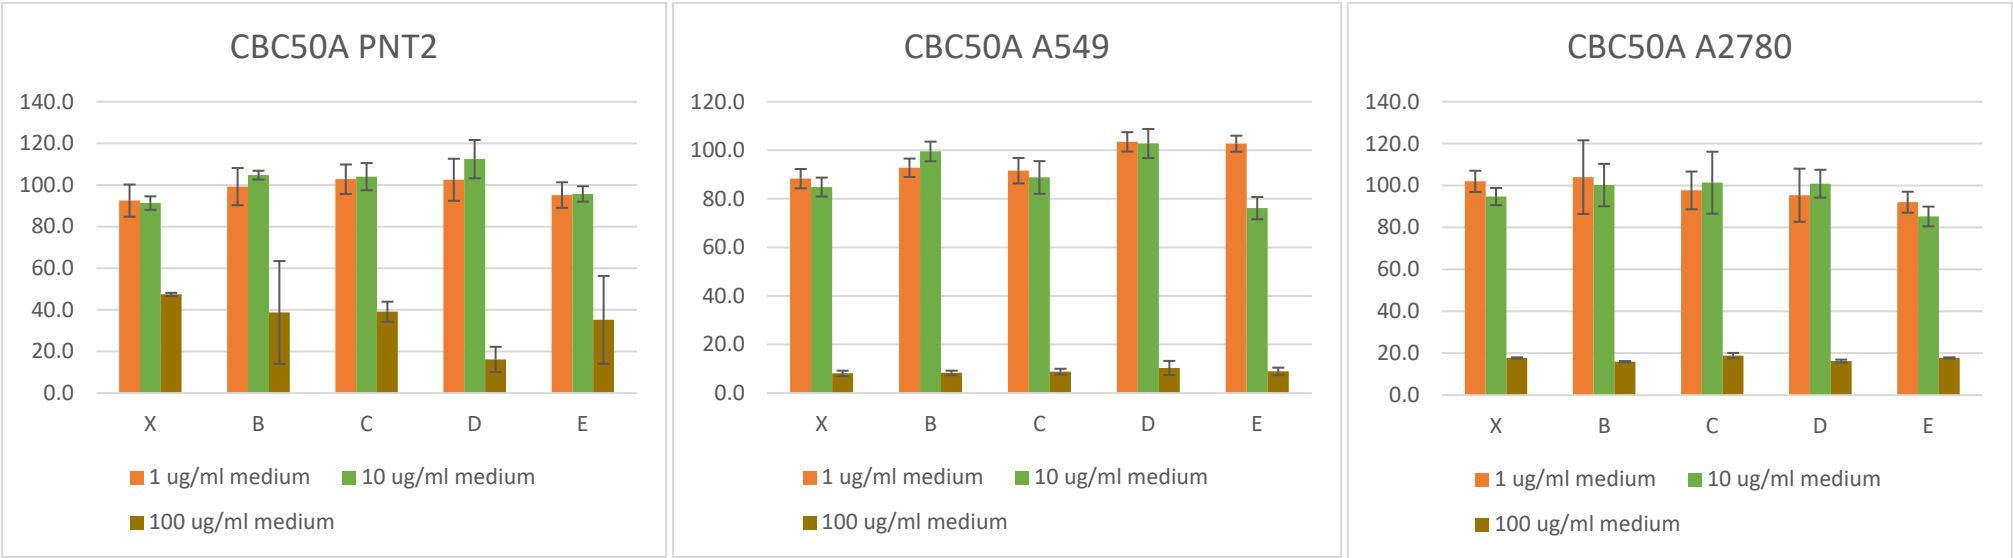

CBC 51 A: (Cnidaria)

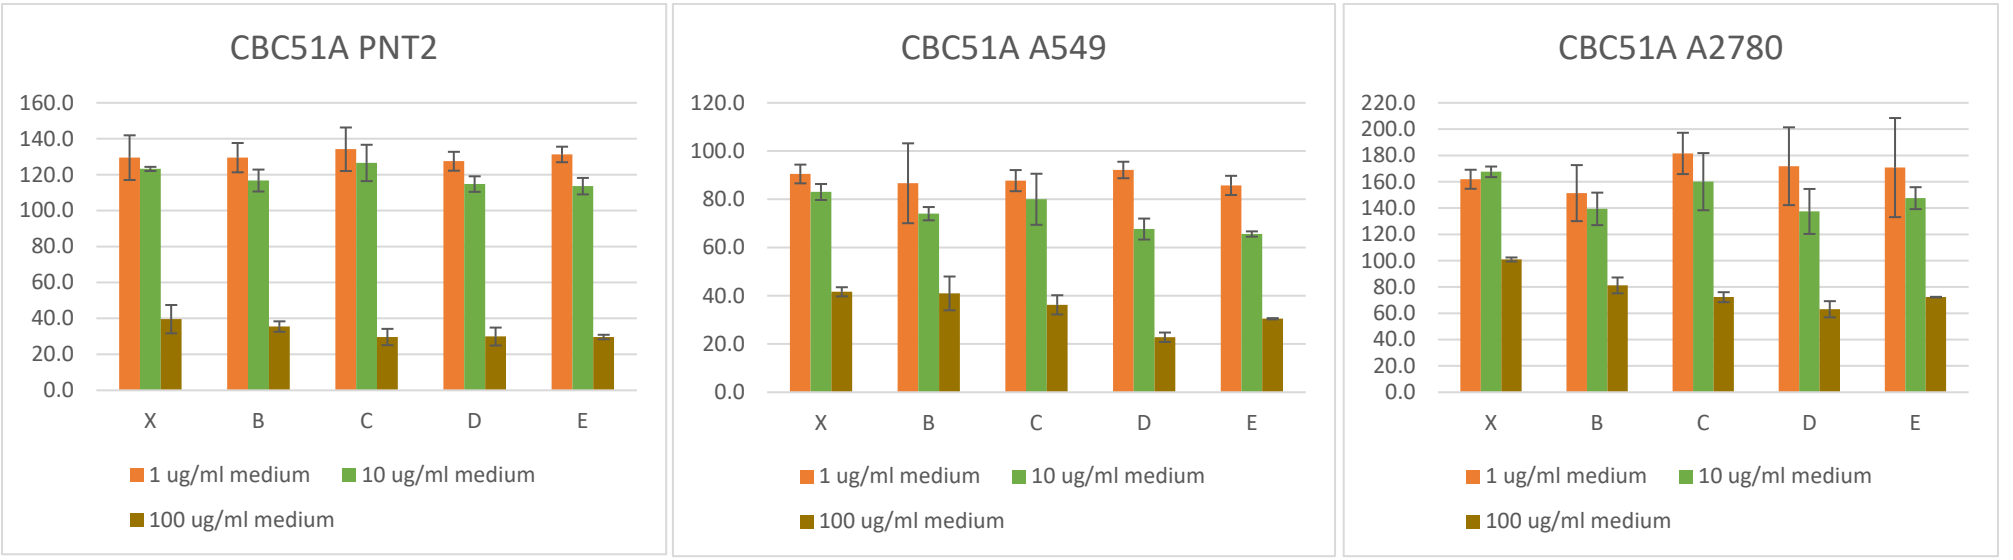



CBC 53 A: (Miozoa)

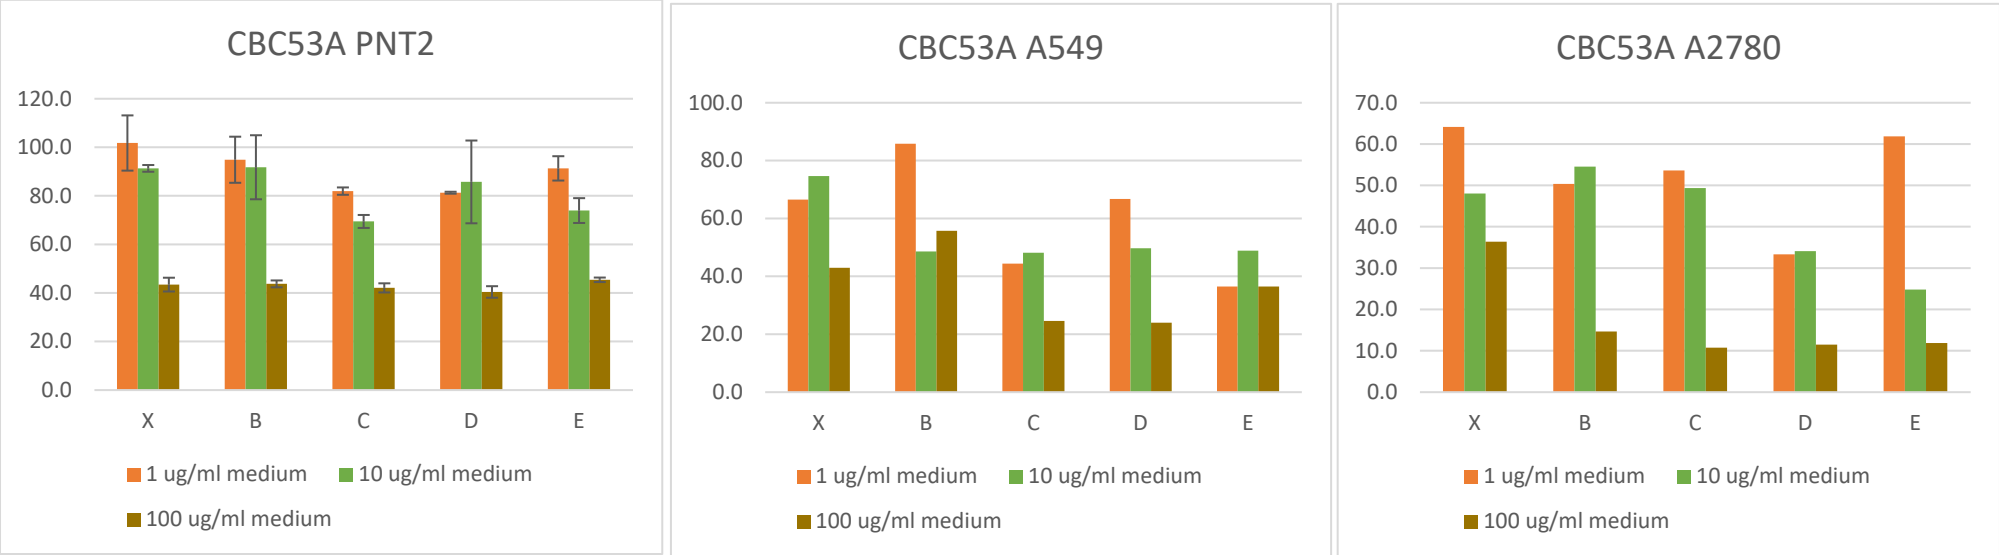

CBC 55 A: (Miozoa)

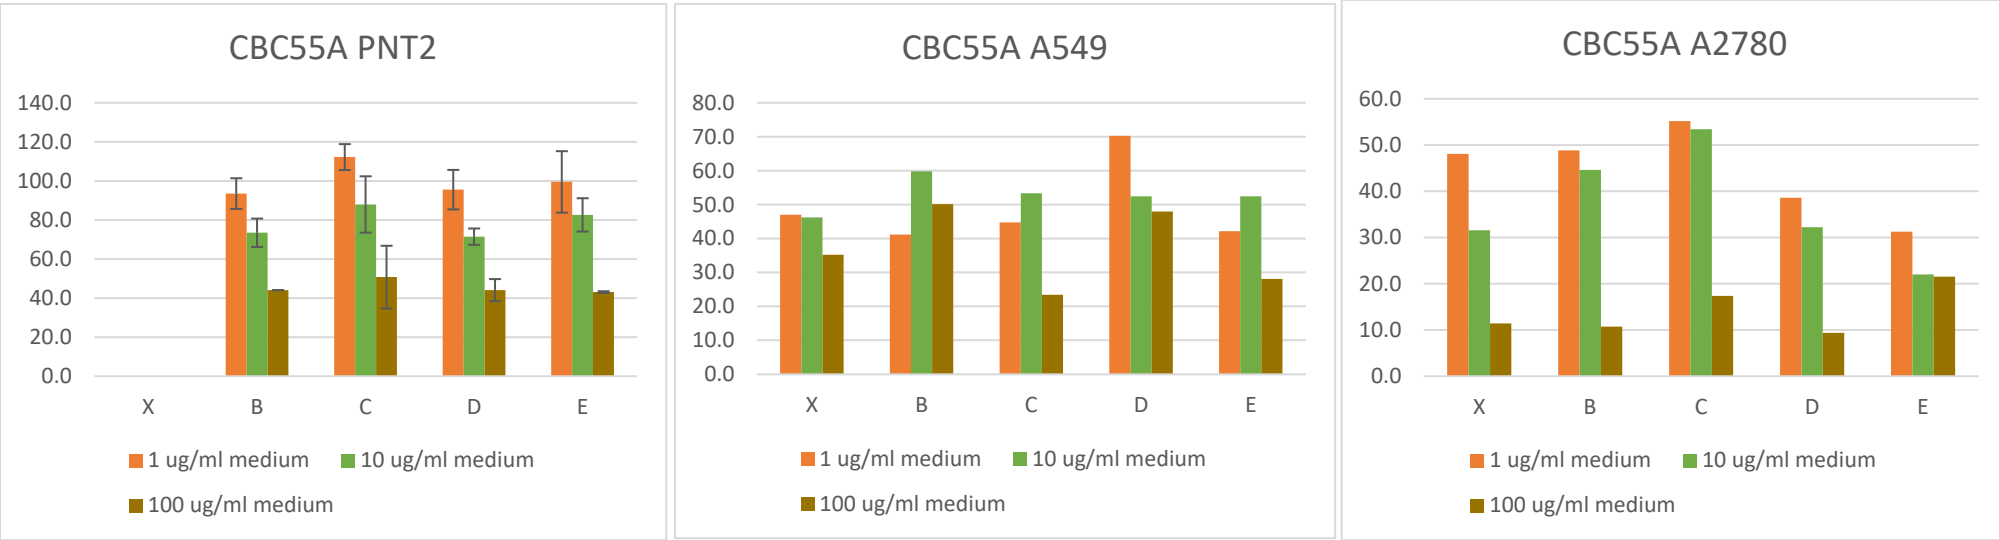

## CBC 56 A: (Porifera)

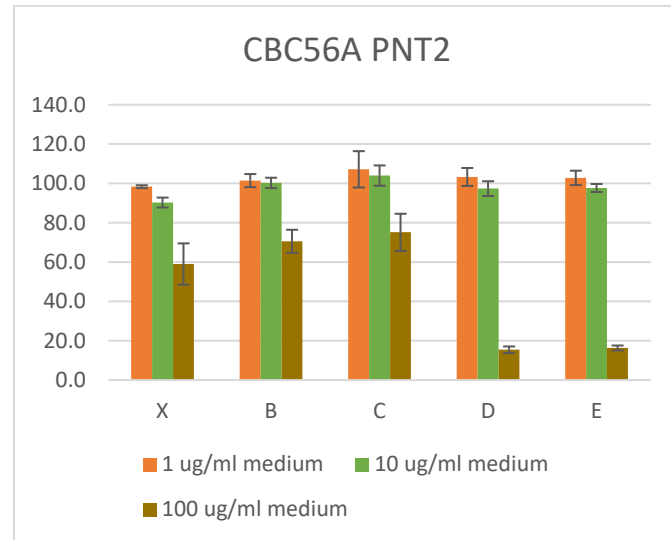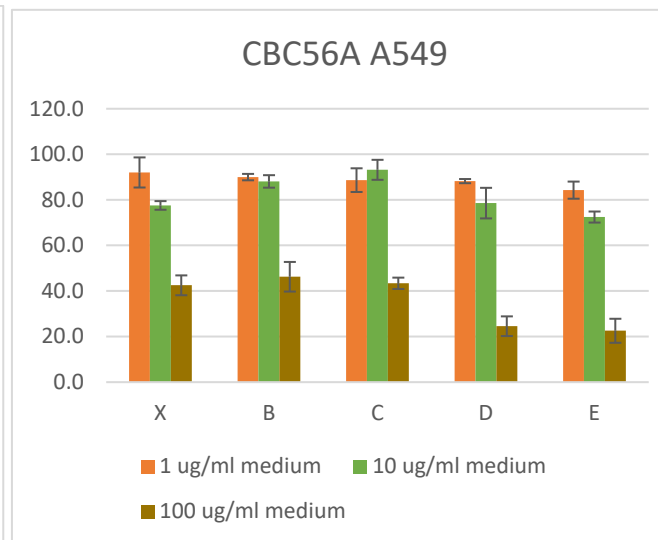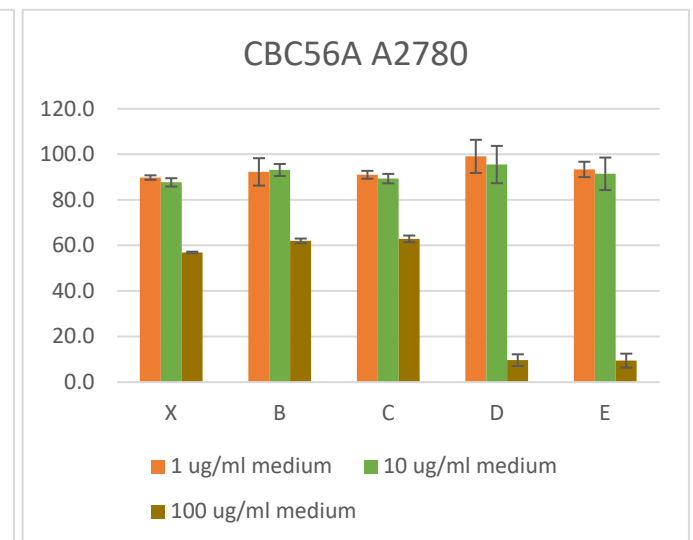

## CBC 57 A: (Porifera)

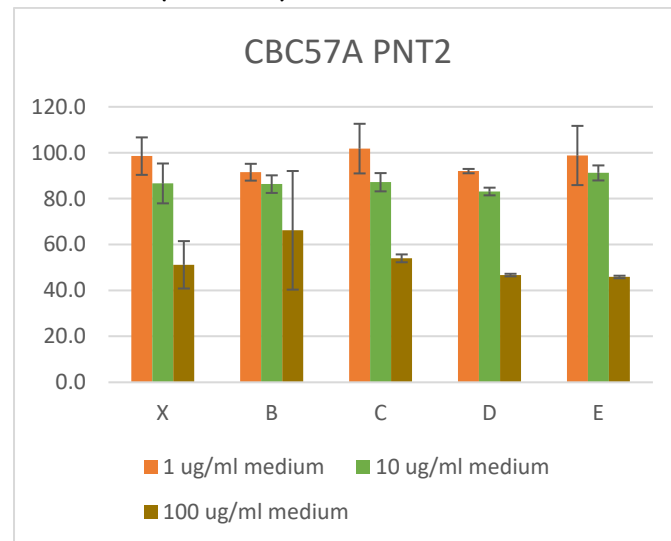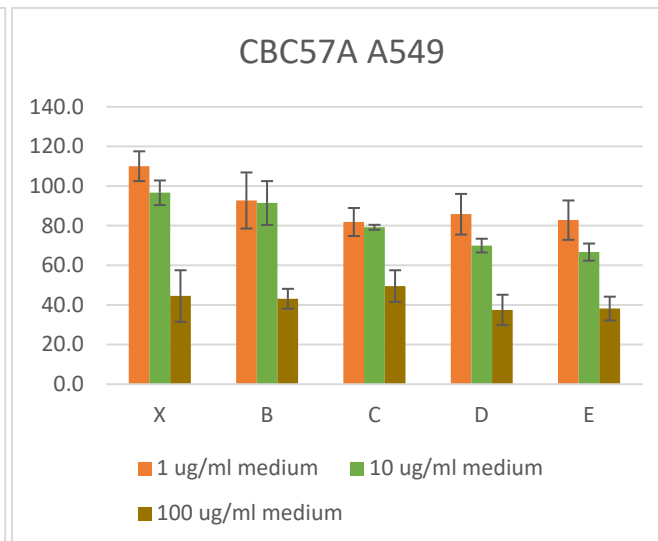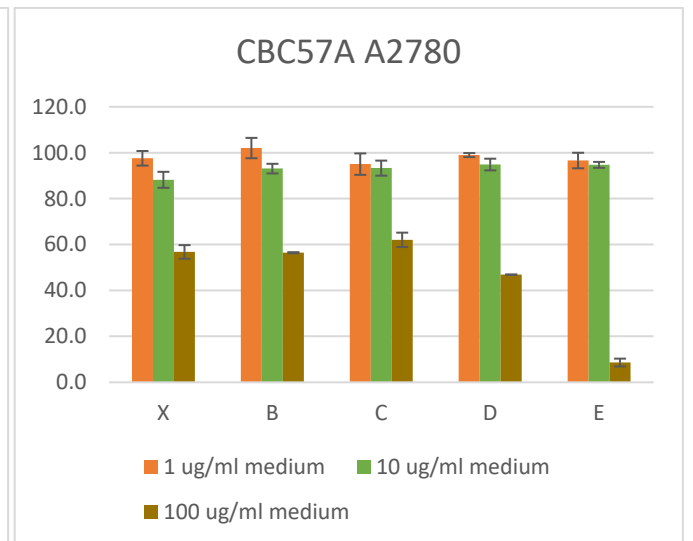

CBC 62 A: (Cnidaria)

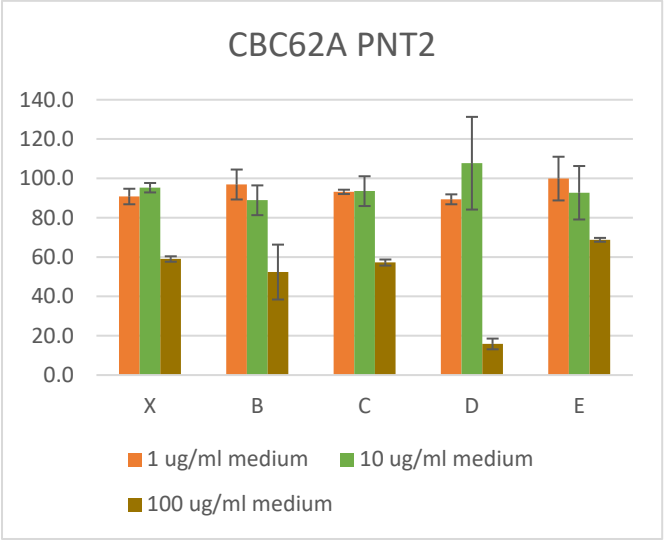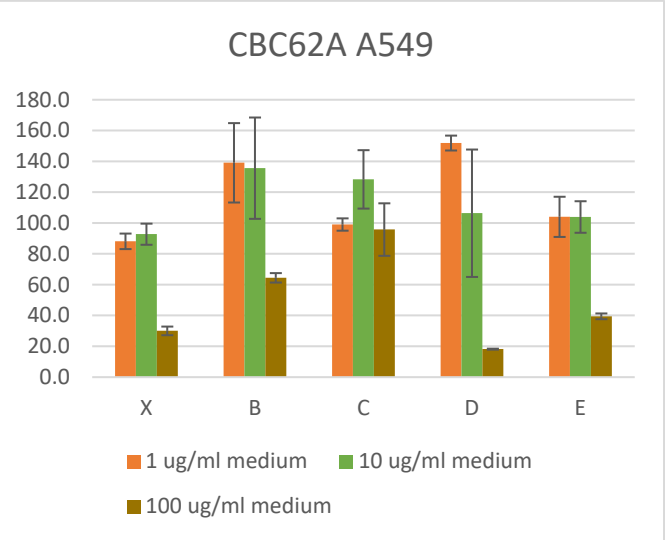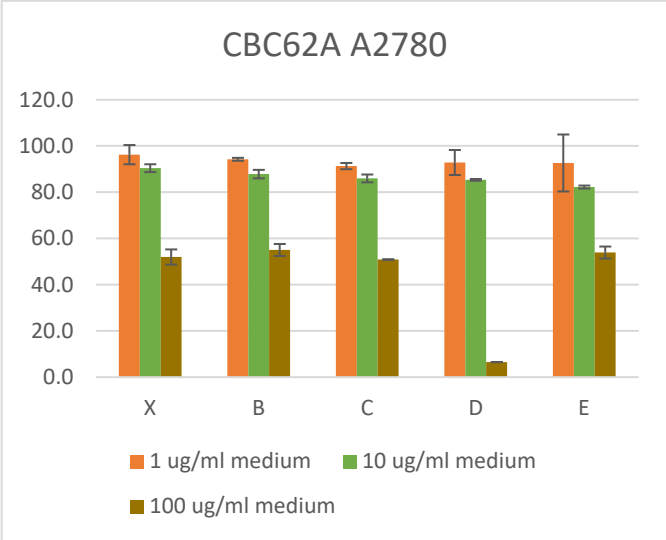

CBC 74 A (Num 1): (Porifera)

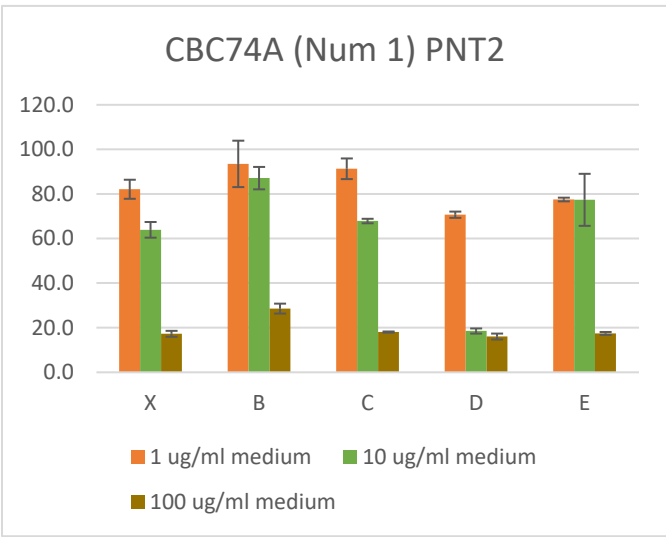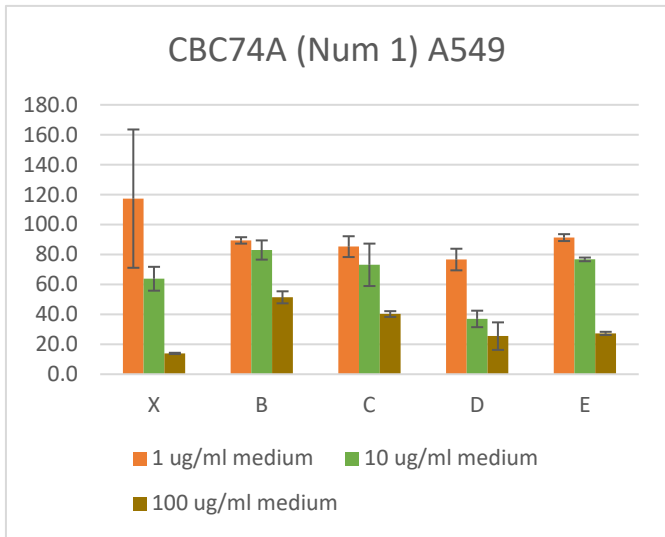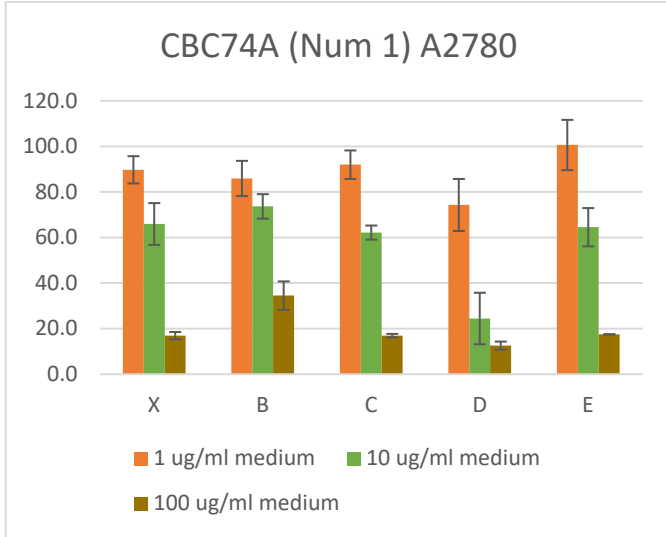

## CBC 74 A (Num 3): (Porifera)

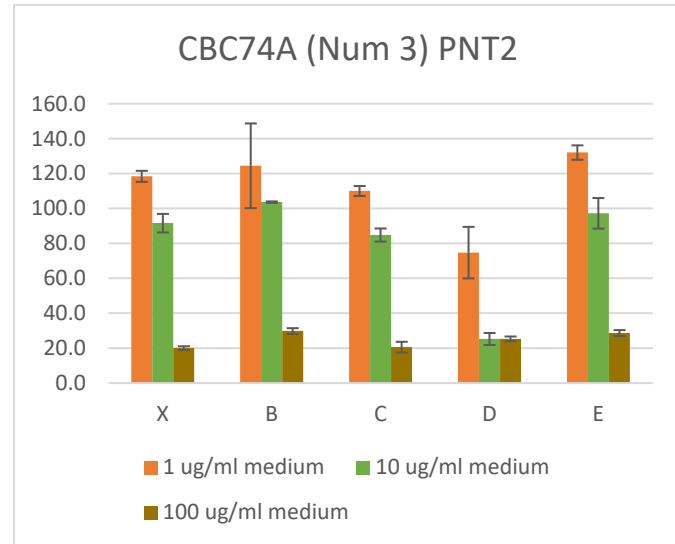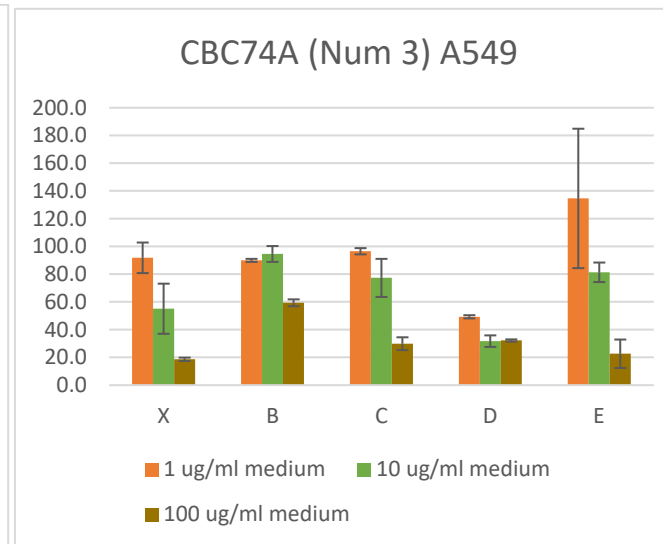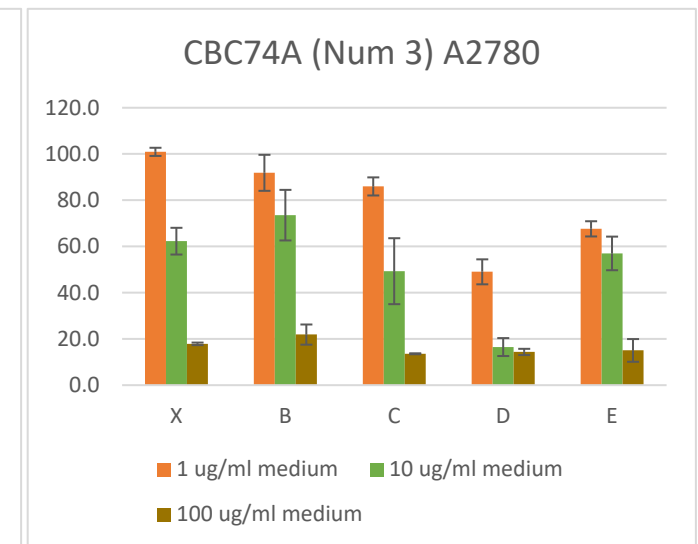

## CBC 74 B: (Porifera)

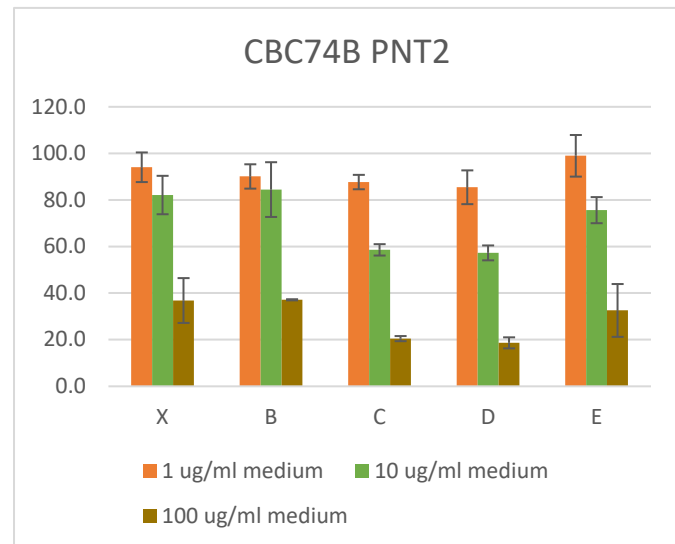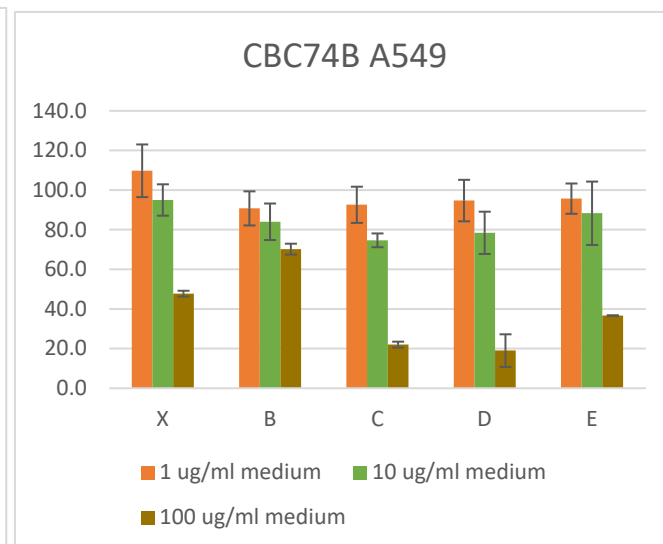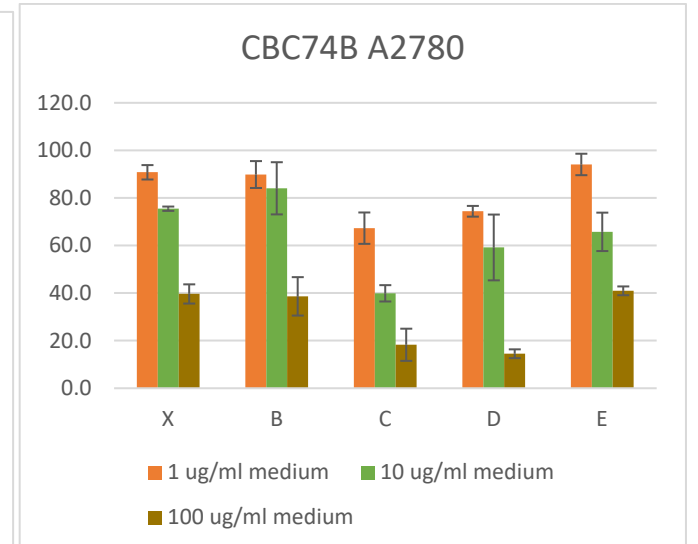

## CBC 75 A: (Porifera)

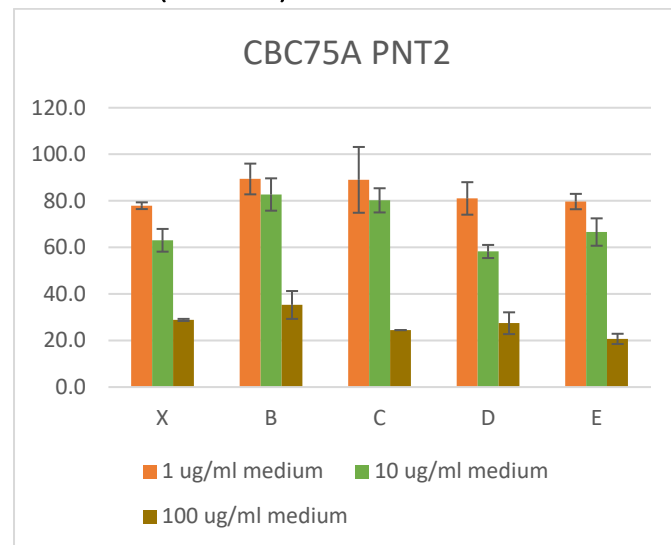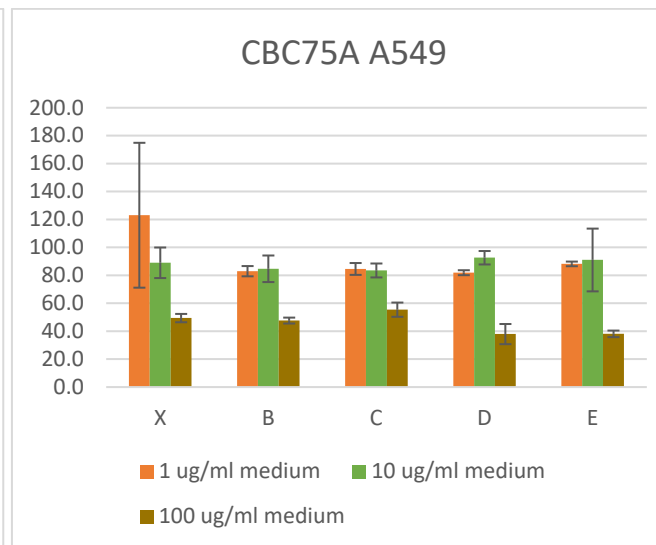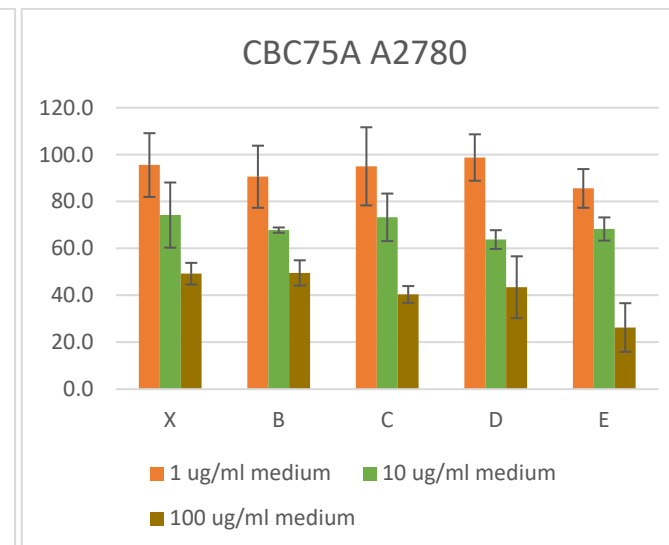

## CBC 77 A: (Porifera)

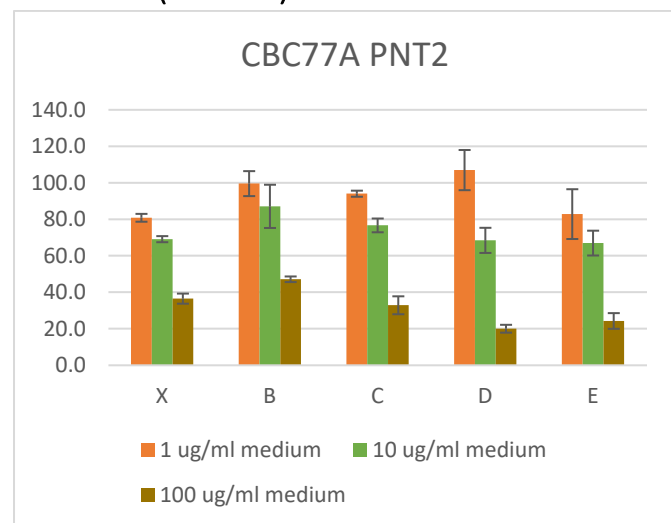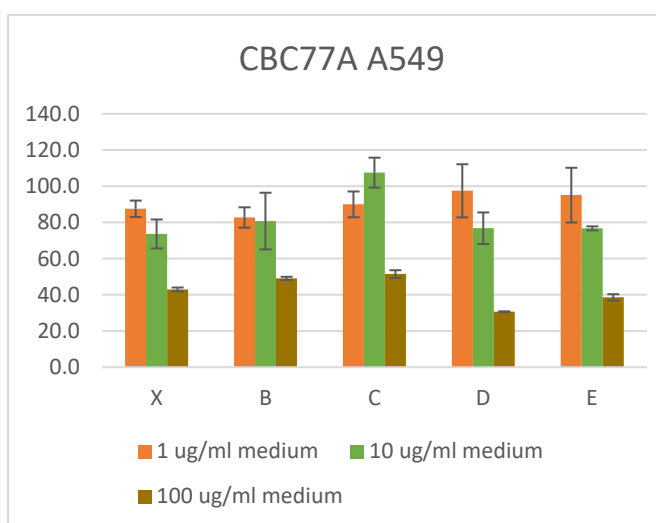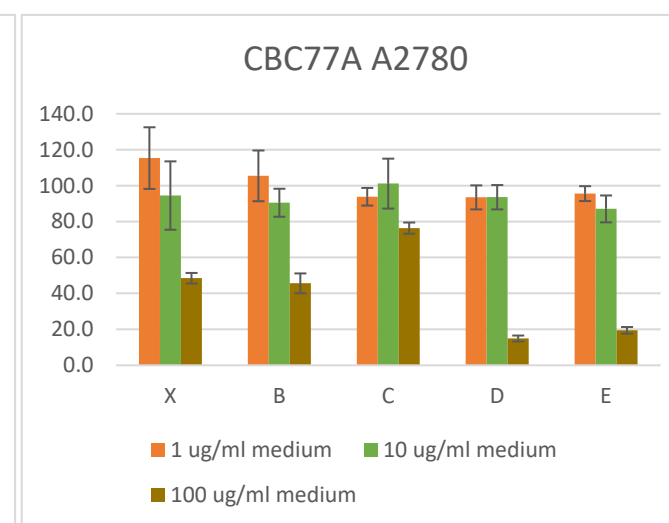

Supplement: s1 [file s1]
