# Supplementary material for: Probing the Therapeutic Potential of Marine Phyla by SPE Extraction
Source: MDPI journal article supplement (doi:10.3390/md19110640), 2021-11-16

**Figure S1.** Non-parametric test and Post-hoc analysis: for each cell line (A2780, A549, PNT2) and dose (100, 10, 1  $\mu\text{g/mL}$ ) we compute Kruskal-Wallis test (non parametric test). • As the p-value is less than the significance level 0.05, we can conclude that there are significant differences between the Phylum. • A multiple pairwise-comparison between Phylum is then performed to calculate pairwise comparisons between Phylum levels with corrections for multiple testing (Dunnett's Test). • We show only the comparisons vs CTRL

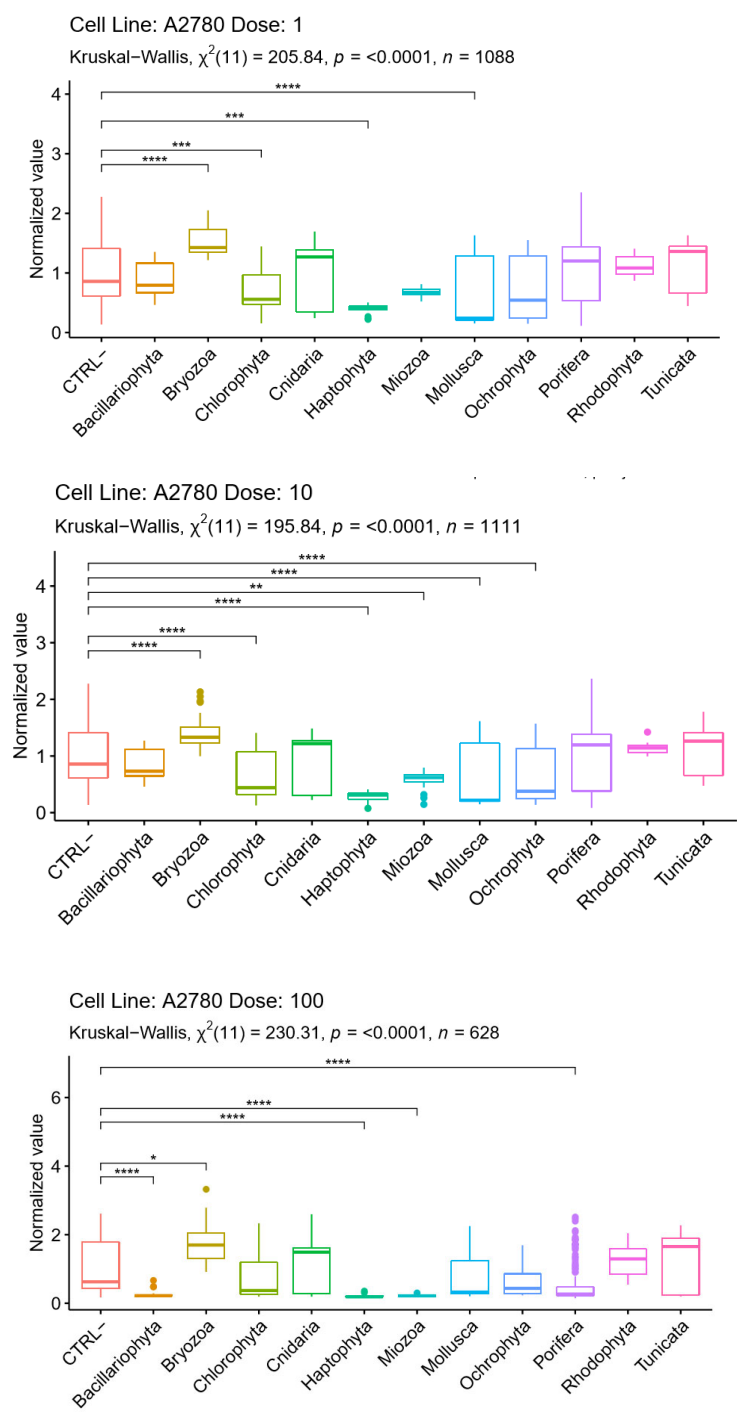

Cell Line: A549 Dose: 1

Kruskal-Wallis,  $\chi^2(11) = 271.6$ ,  $p = <0.0001$ ,  $n = 1034$

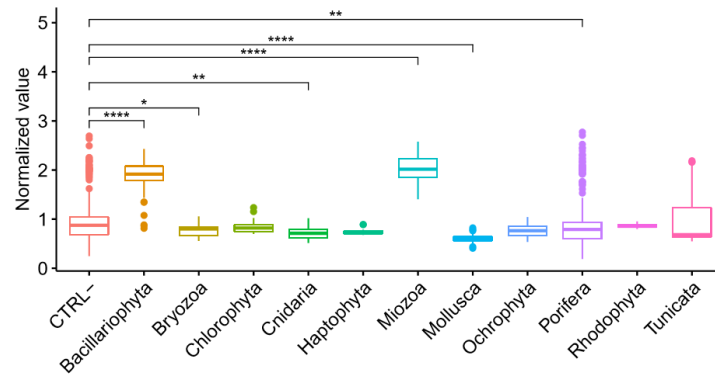

Cell Line: A549 Dose: 10

Kruskal-Wallis,  $\chi^2(11) = 396.01$ ,  $p = <0.0001$ ,  $n = 1099$

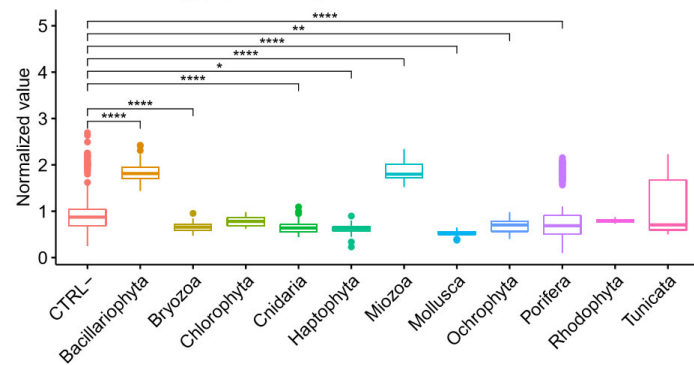

Cell Line: A549 Dose: 100

Kruskal-Wallis,  $\chi^2(11) = 206.92$ ,  $p = <0.0001$ ,  $n = 659$

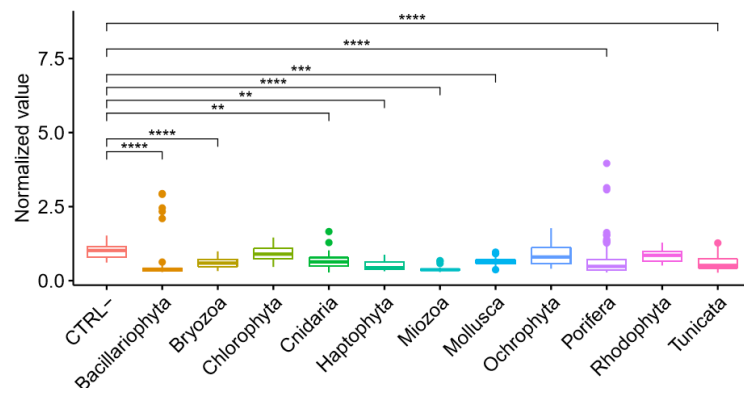

Cell Line: PNT2 Dose: 1

Kruskal-Wallis,  $\chi^2(11) = 454.11$ ,  $p = <0.0001$ ,  $n = 1229$

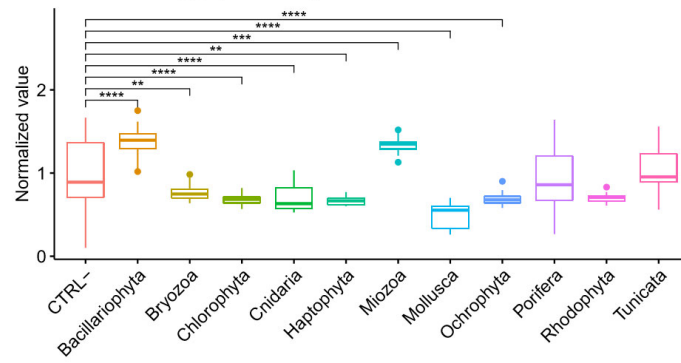

Cell Line: PNT2 Dose: 10

Kruskal-Wallis,  $\chi^2(11) = 486.03$ ,  $p = <0.0001$ ,  $n = 1229$

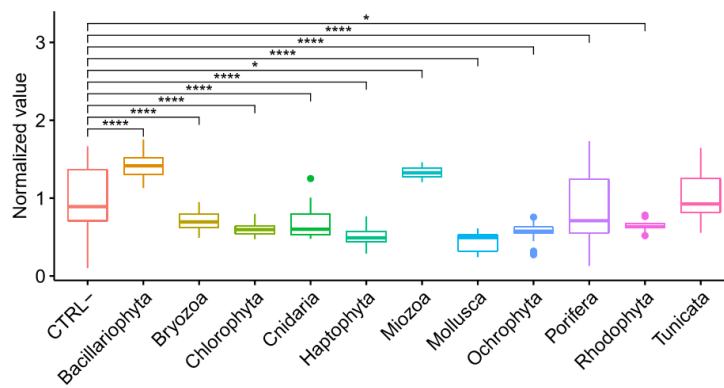

Cell Line: PNT2 Dose: 100

Kruskal-Wallis,  $\chi^2(11) = 160.87$ ,  $p = <0.0001$ ,  $n = 606$

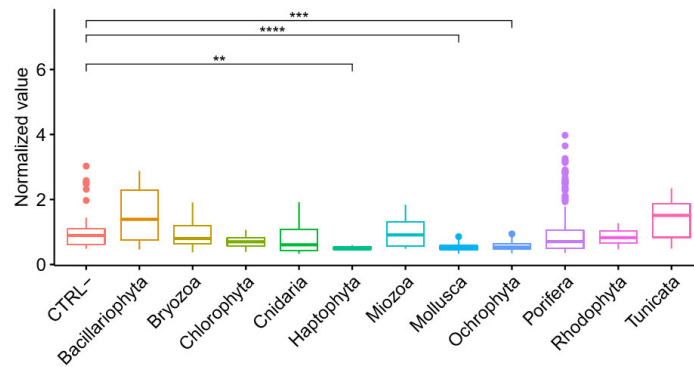

**Figure S2.** Barplot: Log Fold-Change for significant comparisons (vs CTRL-)

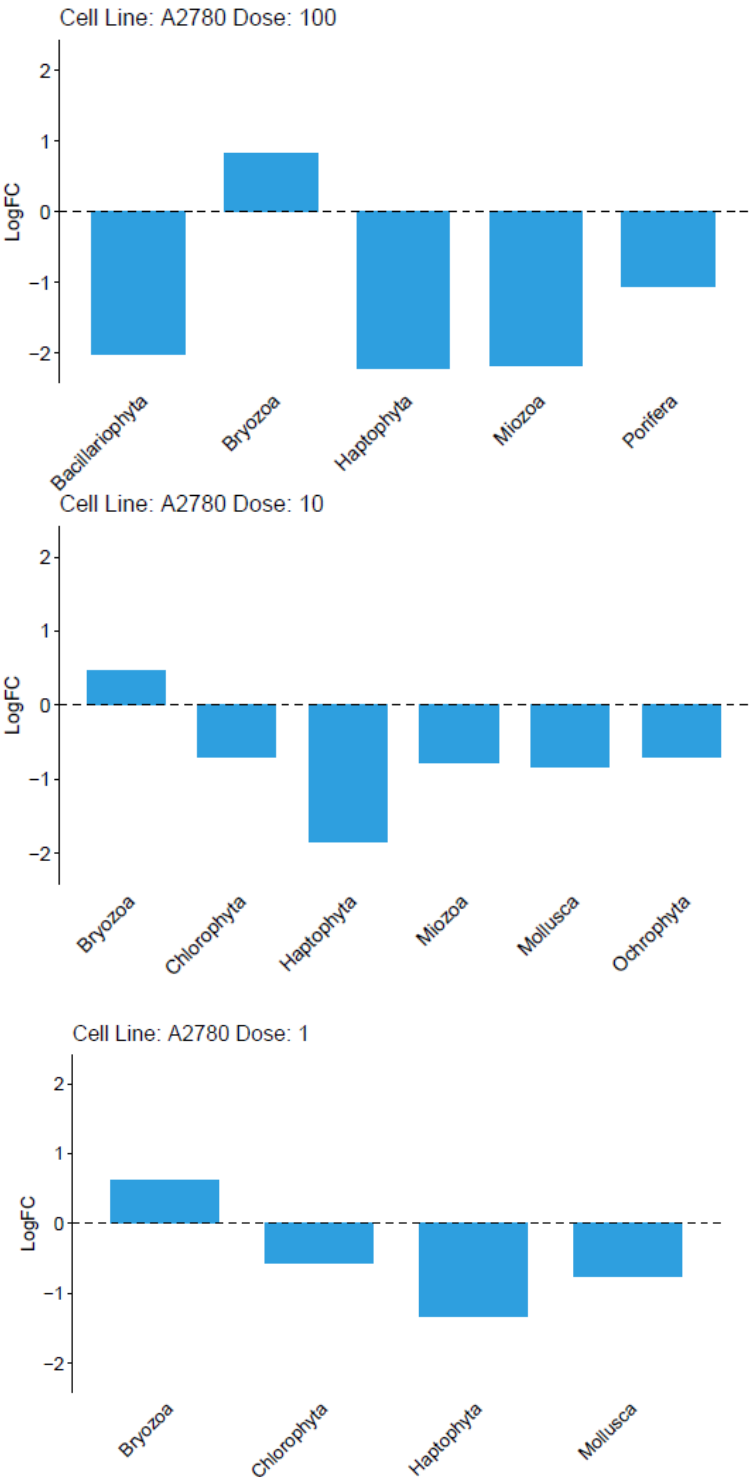

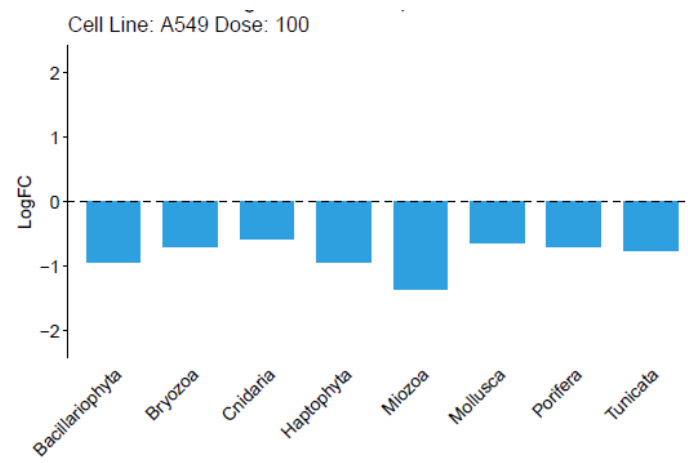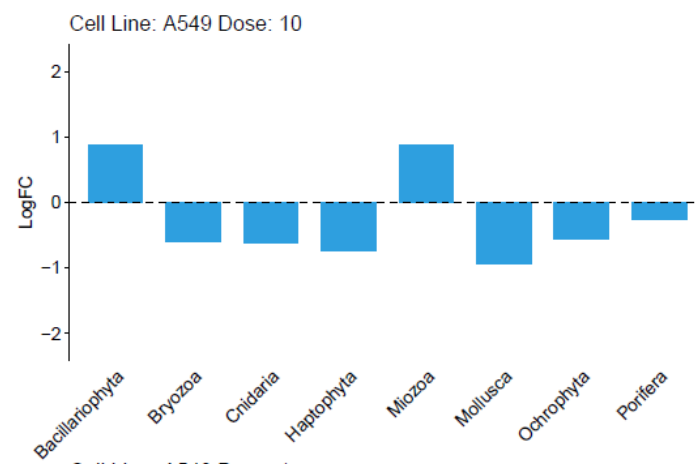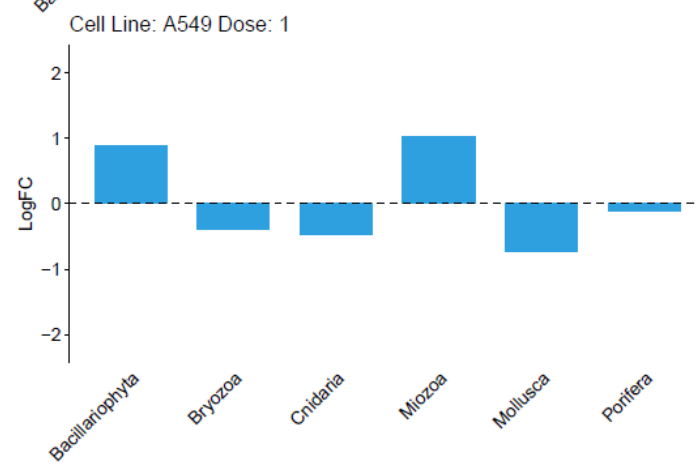

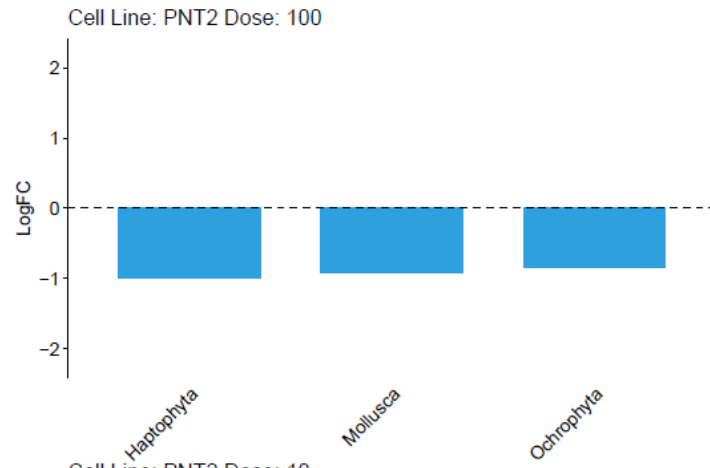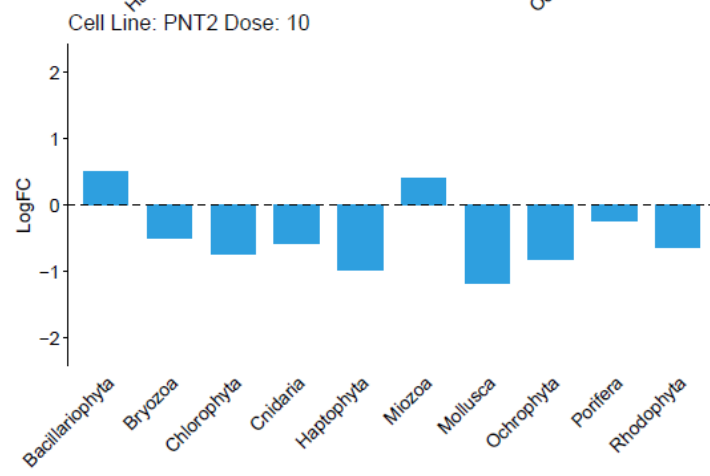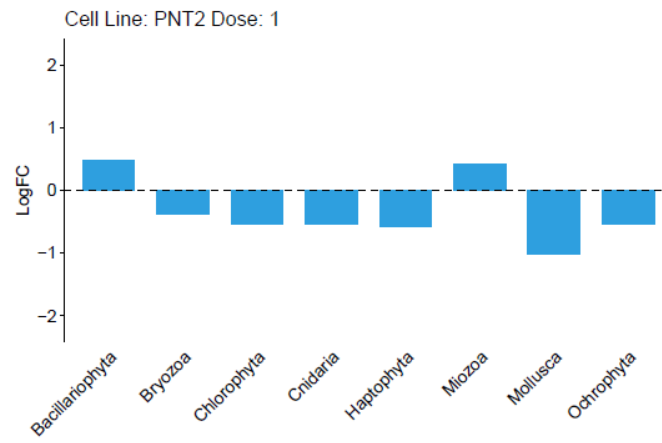

**Figure S3.** Heatmap showing the percentage of vitality on the three cell lines (A549, A2780; PTN2) after treatment with the raw extracts (X) and the corresponding four SPE-fractions (B, C, D, E) at 1 and 10 µg/ml.

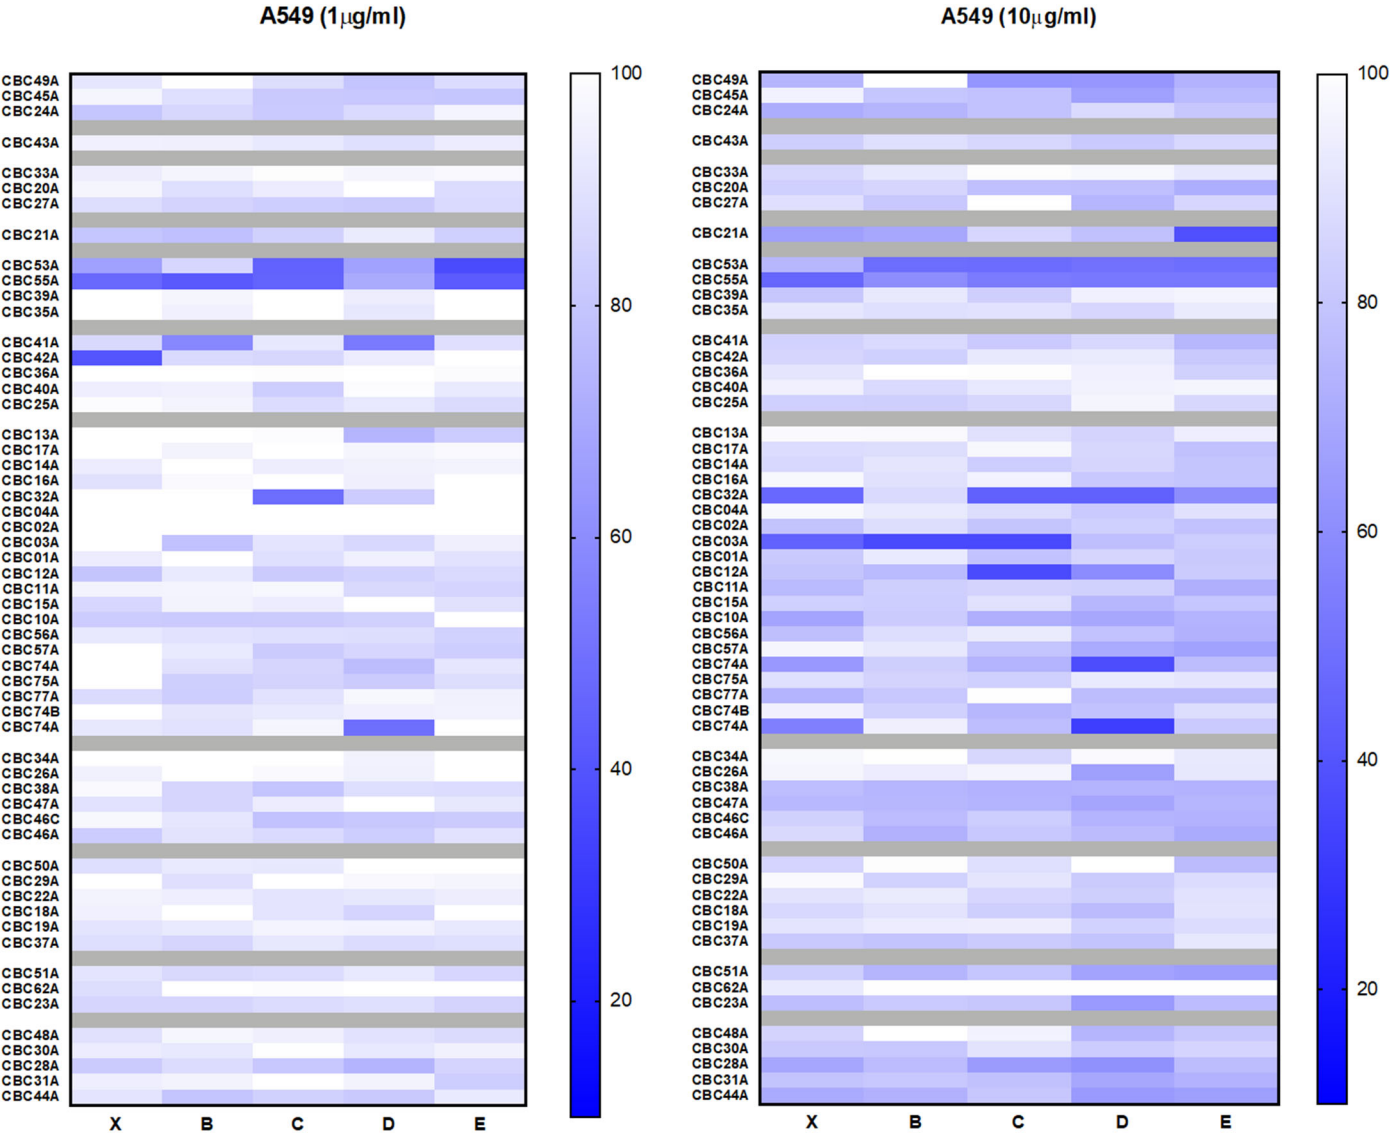

A2780 (1 $\mu$ g/ml)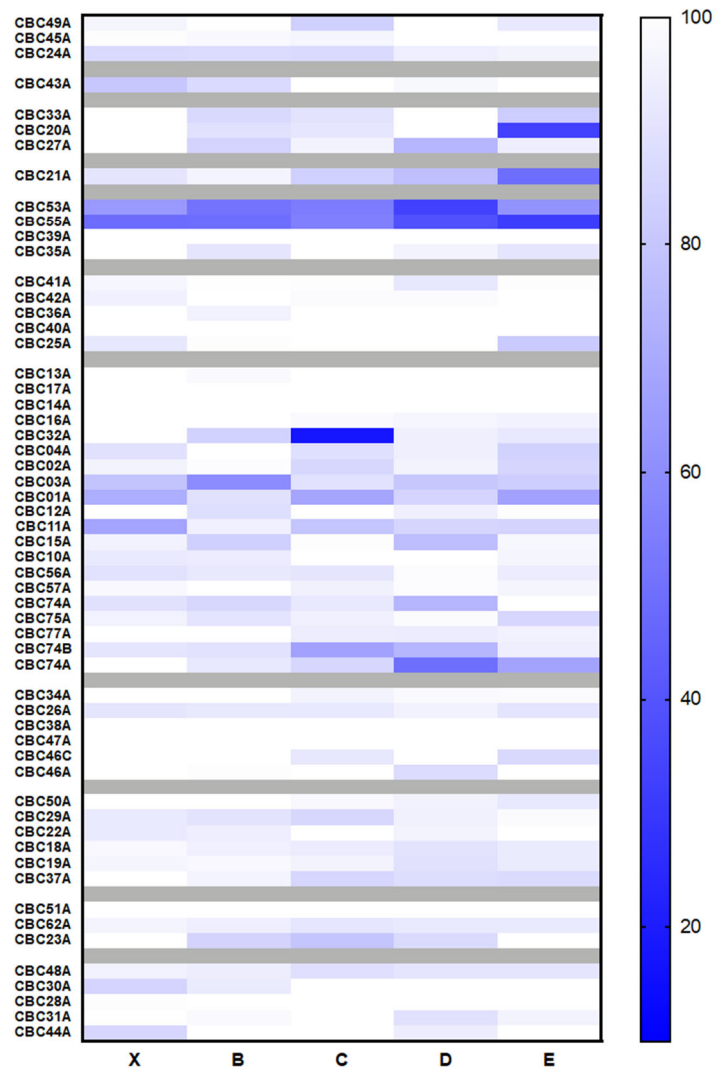A2780 (10 $\mu$ g/ml)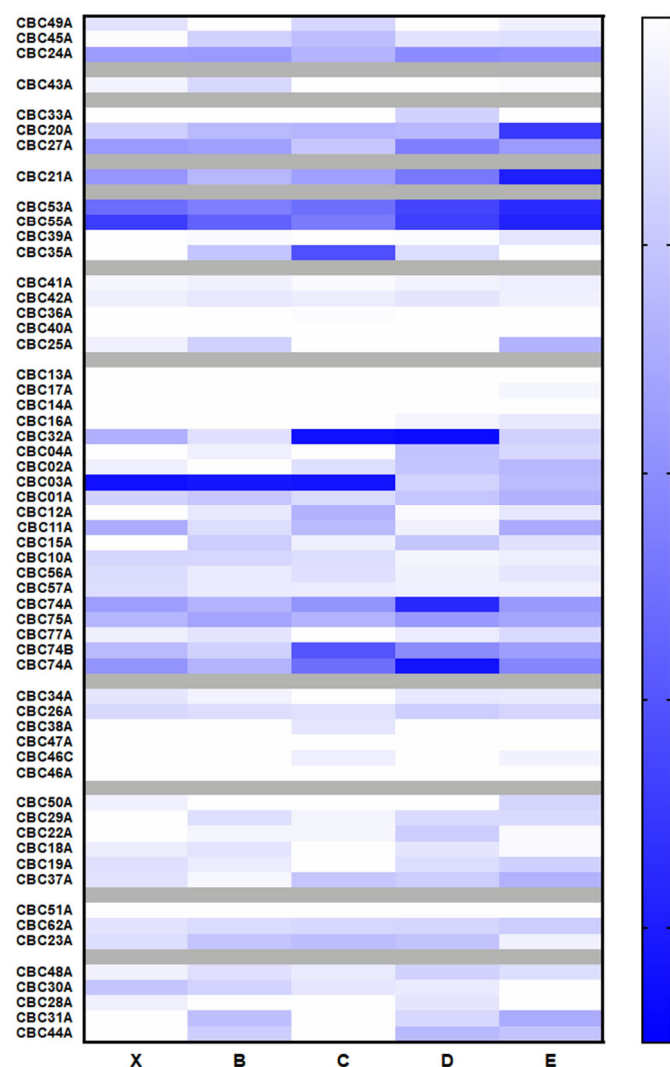



PNT2 (1µg/ml)

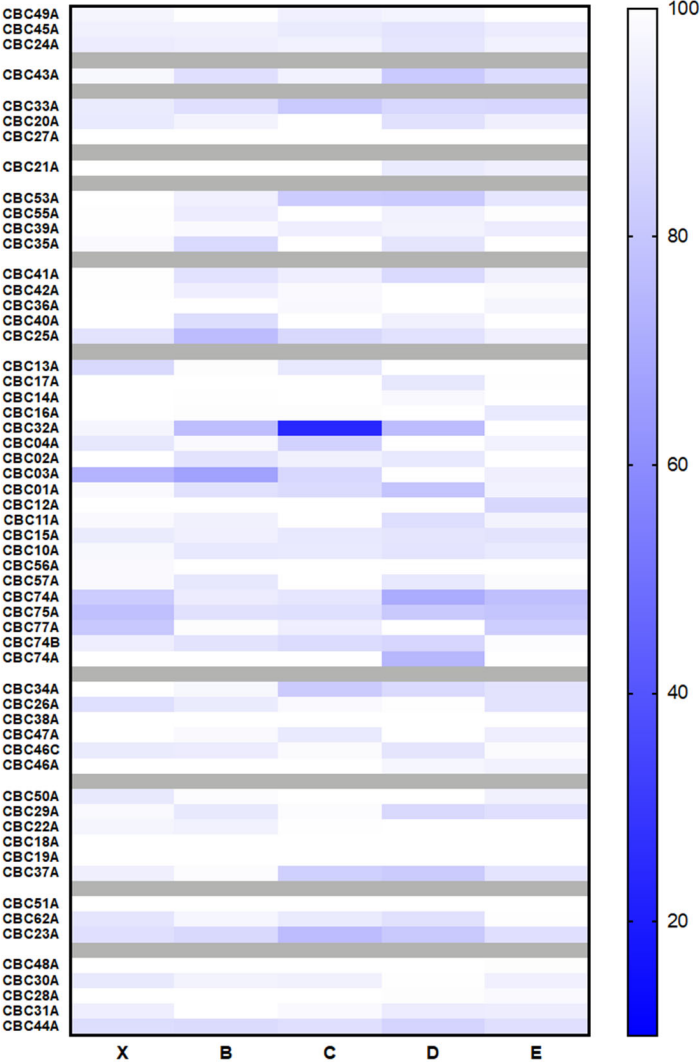

PNT2 (10µg/ml)

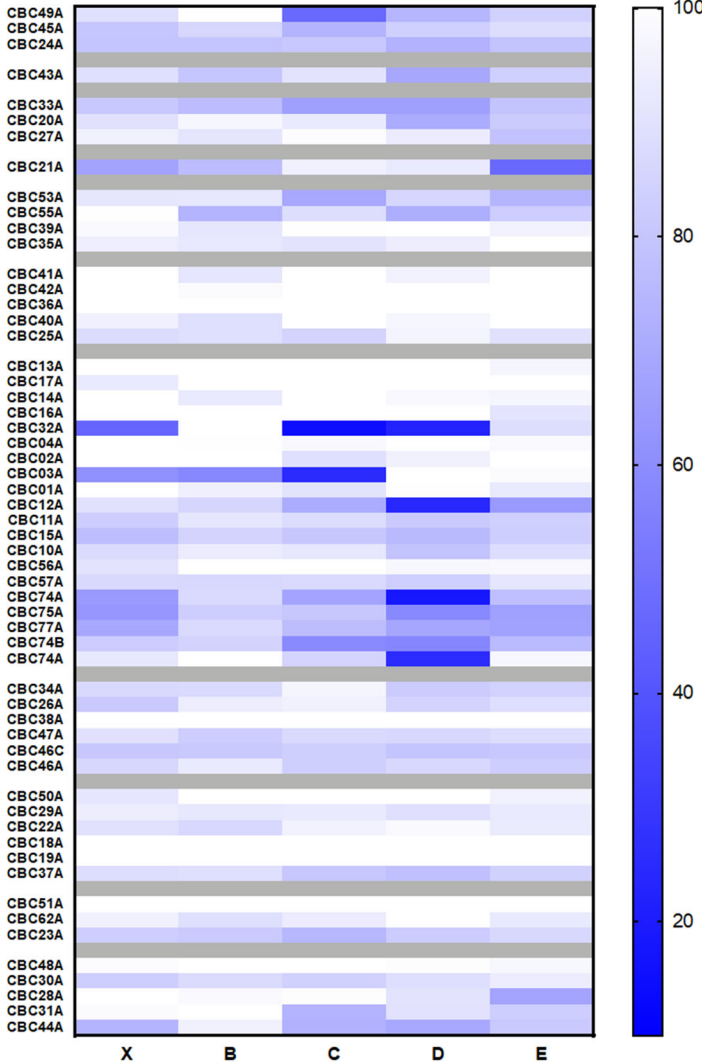

Supplement: s1 [file s1]
