# Supplementary material for: Probing the Therapeutic Potential of Marine Phyla by SPE Extraction
Source: MDPI journal article supplement (doi:10.3390/md19110640), 2021-11-16
Supplement: s1 [file s1]

**Antibacteric assay of the in-house library of Marine Natural Products on five strains on three Gram + (*Staphylococcus aureus*; *Enterococcus faecalis* and *Streptococcus agalactiae* group B) and two Gram – (*Escherichia coli* and *Pseudomonas aeruginosa*). The bacterial inocula were treated with 50 µg/mL of either extracts (X) or its related SPE fractions (B-E). Results were measured as OD at 600 nm after 24 h of incubation. When the OD average was under 0.05, a value comparable to those obtained in the negative controls (not inoculated), the sample was considered active (A); when the OD average was between 0.05 and under 0,09, the sample was considered weakly active (WA); over these values, was considered non active (-).**

| Identification code | Gram +           |                    |                      | Gram -         |                      |
|---------------------|------------------|--------------------|----------------------|----------------|----------------------|
|                     | <i>S. aureus</i> | <i>E. faecalis</i> | <i>S. agalactiae</i> | <i>E. coli</i> | <i>P. aeruginosa</i> |
|                     |                  |                    |                      |                |                      |
| CBC 1 A - X         | -                | -                  | -                    | -              | -                    |
| CBC 1 A – B         | -                | -                  | -                    | -              | -                    |
| CBC 1 A – C         | -                | -                  | -                    | -              | -                    |
| CBC 1 A – D         | -                | -                  | A                    | -              | -                    |
| CBC 1 A - E         | -                | -                  | -                    | -              | -                    |
|                     |                  |                    |                      |                |                      |
| CBC 2 A - X         | -                | -                  | -                    | -              | -                    |
| CBC 2 A – B         | -                | -                  | -                    | -              | -                    |
| CBC 2 A – C         | -                | -                  | -                    | -              | -                    |
| CBC 2 A – D         | -                | -                  | A                    | -              | -                    |
| CBC 2 A - E         | -                | -                  | -                    | -              | -                    |
|                     |                  |                    |                      |                |                      |
| CBC 3 A - X         | A                | A                  | A                    | A              | A                    |
| CBC 3 A – B         | A                | WA                 | WA                   | A              | A                    |
| CBC 3 A – C         | A                | WA                 | WA                   | A              | A                    |
| CBC 3 A – D         | -                | -                  | -                    | -              | -                    |
| CBC 3 A - E         | -                | -                  | -                    | -              | -                    |
|                     |                  |                    |                      |                |                      |
| CBC 4 A - X         | -                | -                  | -                    | -              | -                    |

|              |   |   |   |   |   |
|--------------|---|---|---|---|---|
| CBC 4 A – B  | - | - | - | - | - |
| CBC 4 A – C  | - | - | - | - | - |
| CBC 4 A – D  | - | - | - | - | - |
| CBC 4 A - E  | - | - | - | - | - |
|              |   |   |   |   |   |
| CBC 10 A - X | - | - | - | - | - |
| CBC 10 A – B | - | - | - | - | - |
| CBC 10 A – C | - | - | - | - | - |
| CBC 10 A – D | - | - | - | - | - |
| CBC 10 A - E | - | - | - | - | - |
|              |   |   |   |   |   |
| CBC 11 A - X | - | - | - | - | - |
| CBC 11 A – B | - | - | - | - | - |
| CBC 11 A – C | - | - | - | - | - |
| CBC 11 A – D | - | - | A | - | - |
| CBC 11 A - E | - | - | - | - | - |
|              |   |   |   |   |   |
| CBC 12 A - X | A | A | A | - | - |
| CBC 12 A – B | - | - | - | - | - |
| CBC 12 A – C | - | - | - | - | - |
| CBC 12 A – D | - | A | A | - | - |
| CBC 12 A - E | A | A | A | - | - |
|              |   |   |   |   |   |
| CBC 13 A - X | - | - | - | - | - |
| CBC 13 A – B | - | - | - | - | - |
| CBC 13 A – C | - | - | - | - | - |
| CBC 13 A – D | - | - | - | - | - |
| CBC 13 A - E | - | - | A | - | - |
|              |   |   |   |   |   |
| CBC 14 A - X | - | - | - | - | - |
| CBC 14 A – B | - | - | - | - | - |
| CBC 14 A – C | - | - | - | - | - |

|              |   |   |   |   |   |
|--------------|---|---|---|---|---|
| CBC 14 A – D | - | - | - | - | - |
| CBC 14 A - E | A | - | A | - | - |
|              |   |   |   |   |   |
| CBC 15 A - X | - | - | - | - | - |
| CBC 15 A – B | - | - | - | - | - |
| CBC 15 A – C | - | - | - | - | - |
| CBC 15 A – D | - | - | - | - | - |
| CBC 15 A - E | - | - | - | - | - |
|              |   |   |   |   |   |
| CBC 16 A - X | - | - | - | - | - |
| CBC 16 A – B | - | - | - | - | - |
| CBC 16 A – C | - | - | - | - | - |
| CBC 16 A – D | - | - | - | - | - |
| CBC 16 A - E | - | - | - | - | - |
|              |   |   |   |   |   |
| CBC 17 A - X | - | - | - | - | - |
| CBC 17 A – B | - | - | - | - | - |
| CBC 17 A – C | - | - | - | - | - |
| CBC 17 A – D | - | - | - | - | - |
| CBC 17 A - E | - | - | - | - | - |
|              |   |   |   |   |   |
| CBC 18 A - X | - | - | - | - | - |
| CBC 18 A – B | - | - | - | - | - |
| CBC 18 A – C | - | - | - | - | - |
| CBC 18 A – D | - | - | - | - | - |
| CBC 18 A - E | - | - | - | - | - |
|              |   |   |   |   |   |
| CBC 19 A - X | - | - | - | - | - |
| CBC 19 A – B | - | - | - | - | - |
| CBC 19 A – C | - | - | - | - | - |
| CBC 19 A – D | - | - | - | - | - |
| CBC 19 A - E | - | - | - | - | - |

|              |   |   |   |   |   |
|--------------|---|---|---|---|---|
|              |   |   |   |   |   |
| CBC 20 A - X | - | - | - | - | - |
| CBC 20 A – B | - | - | - | - | - |
| CBC 20 A – C | - | - | - | - | - |
| CBC 20 A – D | - | - | - | - | - |
| CBC 20 A - E | - | - | - | - | - |
|              |   |   |   |   |   |
| CBC 21 A - X | - | - | - | - | - |
| CBC 21 A – B | - | - | - | - | - |
| CBC 21 A – C | - | - | A | - | - |
| CBC 21 A – D | - | - | A | - | - |
| CBC 21 A - E | - | - | - | - | - |
|              |   |   |   |   |   |
| CBC 22 A - X | - | - | - | - | - |
| CBC 22 A – B | - | - | - | - | - |
| CBC 22 A – C | - | - | - | - | - |
| CBC 22 A – D | - | - | - | - | - |
| CBC 22 A - E | - | - | - | - | - |
|              |   |   |   |   |   |
| CBC 23 A - X | - | - | - | - | - |
| CBC 23 A – B | - | - | - | - | - |
| CBC 23 A – C | - | - | - | - | - |
| CBC 23 A – D | - | - | - | - | - |
| CBC 23 A - E | - | - | - | - | - |
|              |   |   |   |   |   |
| CBC 24 A - X | - | - | - | - | - |
| CBC 24 A – B | - | - | - | - | - |
| CBC 24 A – C | - | - | - | - | - |
| CBC 24 A – D | - | - | - | - | - |
| CBC 24 A - E | - | - | - | - | - |
|              |   |   |   |   |   |
| CBC 25 A - X | - | - | - | - | - |

|              |   |   |   |   |   |
|--------------|---|---|---|---|---|
| CBC 25 A – B | - | - | - | - | - |
| CBC 25 A – C | - | - | - | - | - |
| CBC 25 A – D | - | - | - | - | - |
| CBC 25 A - E | - | - | - | - | - |
|              |   |   |   |   |   |
| CBC 26 A - X | - | - | - | - | - |
| CBC 26 A – B | - | - | - | - | - |
| CBC 26 A – C | - | - | A | - | - |
| CBC 26 A – D | - | - | - | - | - |
| CBC 26 A - E | - | - | - | - | - |
|              |   |   |   |   |   |
| CBC 27 A - X | - | - | - | - | - |
| CBC 27 A – B | - | - | - | - | - |
| CBC 27 A – C | - | - | - | - | - |
| CBC 27 A – D | - | - | - | - | - |
| CBC 27 A - E | - | - | - | - | - |
|              |   |   |   |   |   |
| CBC 28 A - X | - | - | - | - | - |
| CBC 28 A – B | - | - | - | - | - |
| CBC 28 A – C | - | - | - | - | - |
| CBC 28 A – D | - | - | - | - | - |
| CBC 28 A - E | - | - | - | - | - |
|              |   |   |   |   |   |
| CBC 29 A - X | - | - | - | - | - |
| CBC 29 A – B | - | - | - | - | - |
| CBC 29 A – C | - | - | - | - | - |
| CBC 29 A – D | - | - | - | - | - |
| CBC 29 A - E | - | - | - | - | - |
|              |   |   |   |   |   |
| CBC 30 A - X | - | - | - | - | - |
| CBC 30 A – B | - | - | - | - | - |
| CBC 30 A – C | - | - | - | - | - |

|              |   |   |    |   |   |
|--------------|---|---|----|---|---|
| CBC 30 A – D | - | - | -  | - | - |
| CBC 30 A - E | - | - | -  | - | - |
|              |   |   |    |   |   |
| CBC 31 A - X | - | - | -  | - | - |
| CBC 31 A – B | - | - | -  | - | - |
| CBC 31 A – C | - | - | -  | - | - |
| CBC 31 A – D | - | - | -  | - | - |
| CBC 31 A - E | - | - | -  | - | - |
|              |   |   |    |   |   |
| CBC 32 A - X | - | - | -  | - | - |
| CBC 32 A – B | - | - | -  | - | - |
| CBC 32 A – C | - | - | -  | - | - |
| CBC 32 A – D | - | - | WA | - | - |
| CBC 32 A - E | - | - | -  | - | - |
|              |   |   |    |   |   |
| CBC 33 A - X | - | - | -  | - | - |
| CBC 33 A – B | - | - | -  | - | - |
| CBC 33 A – C | - | - | -  | - | - |
| CBC 33 A – D | - | - | -  | - | - |
| CBC 33 A - E | - | - | -  | - | - |
|              |   |   |    |   |   |
| CBC 34 A - X | - | - | -  | - | - |
| CBC 34 A – B | - | - | -  | - | - |
| CBC 34 A – C | - | - | -  | - | - |
| CBC 34 A – D | - | - | -  | - | - |
| CBC 34 A - E | - | - | -  | - | - |
|              |   |   |    |   |   |
| CBC 35 A - X | - | - | -  | - | - |
| CBC 35 A – B | - | - | -  | - | - |
| CBC 35 A – C | - | - | -  | - | - |
| CBC 35 A – D | - | - | -  | - | - |
| CBC 35 A - E | - | - | -  | - | - |

|              |   |    |    |   |   |
|--------------|---|----|----|---|---|
|              |   |    |    |   |   |
| CBC 36 A - X | - | -  | -  | - | - |
| CBC 36 A – B | - | -  | -  | - | - |
| CBC 36 A – C | - | -  | -  | - | - |
| CBC 36 A – D | - | -  | -  | - | - |
| CBC 36 A - E | - | -  | -  | - | - |
|              |   |    |    |   |   |
| CBC 37 A - X | - | -  | -  | - | - |
| CBC 37 A – B | - | -  | -  | - | - |
| CBC 37 A – C | - | -  | -  | - | - |
| CBC 37 A – D | - | -  | -  | - | - |
| CBC 37 A - E | - | -  | -  | - | - |
|              |   |    |    |   |   |
| CBC 38 A - X | - | -  | -  | - | - |
| CBC 38 A – B | - | -  | -  | - | - |
| CBC 38 A – C | - | -  | WA | - | - |
| CBC 38 A – D | - | -  | A  | - | - |
| CBC 38 A - E | - | -  | -  | - | - |
|              |   |    |    |   |   |
| CBC 39 A - X | - | -  | -  | - | - |
| CBC 39 A – B | - | -  | -  | - | - |
| CBC 39 A – C | - | -  | -  | - | - |
| CBC 39 A – D | - | -  | -  | - | - |
| CBC 39 A - E | - | -  | -  | - | - |
|              |   |    |    |   |   |
| CBC 40 A - X | - | -  | -  | - | - |
| CBC 40 A – B | - | -  | -  | - | - |
| CBC 40 A – C | - | -  | -  | - | - |
| CBC 40 A – D | - | -  | -  | - | - |
| CBC 40 A - E | - | WA | A  | - | - |
|              |   |    |    |   |   |
| CBC 41 A - X | - | -  | -  | - | - |

|              |   |    |    |   |   |
|--------------|---|----|----|---|---|
| CBC 41 A – B | - | -  | -  | - | - |
| CBC 41 A – C | - | -  | WA | - | - |
| CBC 41 A – D | - | -  | -  | - | - |
| CBC 41 A - E | - | -  | -  | - | - |
|              |   |    |    |   |   |
| CBC 42 A - X | - | -  | -  | - | - |
| CBC 42 A – B | - | -  | -  | - | - |
| CBC 42 A – C | - | -  | WA | - | - |
| CBC 42 A – D | - | -  | -  | - | - |
| CBC 42 A - E | - | -  | -  | - | - |
|              |   |    |    |   |   |
| CBC 43 A - X | - | -  | -  | - | - |
| CBC 43 A – B | - | -  | -  | - | - |
| CBC 43 A – C | - | -  | -  | - | - |
| CBC 43 A – D | - | -  | -  | - | - |
| CBC 43 A - E | - | -  | -  | - | - |
|              |   |    |    |   |   |
| CBC 44 A - X | - | -  | -  | - | - |
| CBC 44 A – B | - | -  | -  | - | - |
| CBC 44 A – C | - | -  | -  | - | - |
| CBC 44 A – D | - | -  | A  | - | - |
| CBC 44 A - E | - | -  | -  | - | - |
|              |   |    |    |   |   |
| CBC 45 A - X | A | WA | A  | - | - |
| CBC 45 A – B | A | -  | -  | - | - |
| CBC 45 A – C | A | A  | A  | - | - |
| CBC 45 A – D | A | A  | A  | - | - |
| CBC 45 A - E | A | WA | A  | - | - |
|              |   |    |    |   |   |
| CBC 46 A - X | - | -  | -  | - | - |
| CBC 46 A – B | - | -  | -  | - | - |
| CBC 46 A – C | - | -  | -  | - | - |



|              |             |             |             |             |             |
|--------------|-------------|-------------|-------------|-------------|-------------|
| CBC 46 A – D | -           | -           | -           | -           | -           |
| CBC 46 A - E | -           | -           | -           | -           | -           |
|              |             |             |             |             |             |
| CBC 46 C - X | -           | -           | -           | -           | -           |
| CBC 46 C – B | -           | -           | -           | -           | -           |
| CBC 46 C – C | A           | A           | A           | -           | -           |
| CBC 46 C – D | WA          | -           | WA          | -           | -           |
| CBC 46 C - E | -           | -           | -           | -           | -           |
|              |             |             |             |             |             |
| CBC 47 A - X | -           | -           | -           | -           | -           |
| CBC 47 A – B | -           | -           | -           | -           | -           |
| CBC 47 A – C | -           | -           | -           | -           | -           |
| CBC 47 A – D | -           | -           | A           | -           | -           |
| CBC 47 A - E | -           | -           | -           | -           | -           |
|              |             |             |             |             |             |
| CBC 48 A - X | -           | -           | -           | -           | -           |
| CBC 48 A – B | -           | -           | -           | -           | -           |
| CBC 48 A – C | -           | -           | -           | -           | -           |
| CBC 48 A – D | -           | -           | A           | -           | -           |
| CBC 48 A - E | -           | -           | -           | -           | -           |
|              |             |             |             |             |             |
| CBC 49 A - X | -           | -           | -           | -           | -           |
| No sample B  | No sample B | No sample B | No sample B | No sample B | No sample B |
| CBC 49 A – C | -           | -           | -           | -           | -           |
| CBC 49 A – D | -           | -           | -           | -           | -           |
| CBC 49 A - E | -           | -           | -           | -           | -           |
|              |             |             |             |             |             |
| CBC 50 A - X | -           | -           | -           | -           | -           |
| CBC 50 A – B | -           | -           | -           | -           | -           |
| CBC 50 A – C | -           | -           | -           | -           | -           |
| CBC 50 A – D | -           | -           | A           | -           | -           |
| CBC 50 A - E | -           | -           | -           | -           | -           |

|                        |   |   |   |   |   |
|------------------------|---|---|---|---|---|
|                        |   |   |   |   |   |
| CBC 51 A - X           | - | - | - | - | - |
| CBC 51 A – B           | - | - | - | - | - |
| CBC 51 A – C           | - | - | A | - | - |
| CBC 51 A – D           | - | - | A | - | - |
| CBC 51 A - E           | - | - | - | - | - |
|                        |   |   |   |   |   |
| CBC 53 A - X           | - | - | - | - | - |
| CBC 53 A – B           | - | - | - | - | - |
| CBC 53 A – C           | - | - | - | - | - |
| CBC 53 A – D           | - | - | - | - | - |
| CBC 53 A - E           | - | - | - | - | - |
|                        |   |   |   |   |   |
| CBC 55 A - X           | - | - | - | - | - |
| CBC 55 A – B           | - | - | - | - | - |
| CBC 55 A – C           | A | - | - | - | - |
| CBC 55 A – D           | - | - | - | - | - |
| CBC 55 A - E           | - | - | - | - | - |
|                        |   |   |   |   |   |
| CBC 74 A (Numb. 1) - X | - | - | - | - | - |
| CBC 74 A (Numb. 1) – B | - | - | - | - | - |
| CBC 74 A (Numb. 1) – C | - | - | - | - | - |
| CBC 74 A (Numb. 1) – D | - | - | A | - | - |
| CBC 74 A (Numb. 1) - E | - | - | - | - | - |
|                        |   |   |   |   |   |
| CBC 74 A (Numb. 3) - X | - | - | - | - | - |
| CBC 74 A (Numb. 3) – B | - | - | - | - | - |
| CBC 74 A (Numb. 3) – C | - | - | - | - | - |
| CBC 74 A (Numb. 3) – D | - | - | A | - | - |
| CBC 74 A (Numb. 3) - E | - | - | - | - | - |
|                        |   |   |   |   |   |
| CBC 74 B - X           | - | - | - | - | - |

|                     |   |   |          |   |   |
|---------------------|---|---|----------|---|---|
| <b>CBC 74 B – B</b> | - | - | -        | - | - |
| <b>CBC 74 B – C</b> | - | - | -        | - | - |
| <b>CBC 74 B – D</b> | - | - | <b>A</b> | - | - |
| <b>CBC 74 B - E</b> | - | - | -        | - | - |
|                     |   |   |          |   |   |
| <b>CBC 75 A - X</b> | - | - | -        | - | - |
| <b>CBC 75 A – B</b> | - | - | -        | - | - |
| <b>CBC 75 A – C</b> | - | - | -        | - | - |
| <b>CBC 75 A – D</b> | - | - | -        | - | - |
| <b>CBC 75 A - E</b> | - | - | -        | - | - |
|                     |   |   |          |   |   |
| <b>CBC 77 A - X</b> | - | - | -        | - | - |
| <b>CBC 77 A – B</b> | - | - | -        | - | - |
| <b>CBC 77 A – C</b> | - | - | -        | - | - |
| <b>CBC 77 A – D</b> | - | - | -        | - | - |
| <b>CBC 77 A - E</b> | - | - | -        | - | - |
|                     |   |   |          |   |   |

CBC 56 A, CBC 57 A and CBC 62 A aren't available for testing.
